# Supplementary material for: Regulating the exciton binding energy of covalent triazine frameworks for enhancing photocatalysis
Source: Royal Society of Chemistry journal article supplement (doi:10.1039/d2ta06479k), 2022-01-01
Supplement: d2ta06479k1.pdf [file d2ta06479k1.pdf]

# ***Supporting information***

## **Regulating the Exciton Binding Energy of Covalent Triazine Frameworks for Enhancing Photocatalysis**

Weijie Zhang<sup>a\*</sup>, Zhaozhang Deng<sup>b</sup>, Jiyong Deng<sup>a</sup>, Chak-Tong Au<sup>a</sup>,  
Yunfeng Liao<sup>a</sup>, Hai Yang<sup>a\*</sup>, Qingquan Liu<sup>b\*</sup>.

<sup>a</sup>Hunan Provincial Key Laboratory of Environmental Catalysis & Waste Recycling, School of Chemistry and Chemical Engineering, Hunan Institute of Engineering, Xiangtan 411104, China.

<sup>b</sup>Hunan Provincial Key Lab of Advanced Materials for New Energy Storage and Conversion, Hunan University of Science and Technology, Xiangtan 411201, China.

E-mail:                   weijie\_zhang@hnie.edu.cn;                   yanghai1001@163.com;  
qqliu@hnust.edu.cn.

## Table of Contents

|                                                           |    |
|-----------------------------------------------------------|----|
| 1. Preparation procedures.....                            | 3  |
| 2. Measurements.....                                      | 6  |
| 3. Characterization .....                                 | 7  |
| 4. $^1\text{H}$ NMR and $^{13}\text{C}$ NMR spectra ..... | 22 |

# 1. Preparation procedures

## 1.1 Synthesis of intermediates, Ph-CTF, Th-CTF, and DD-CTF

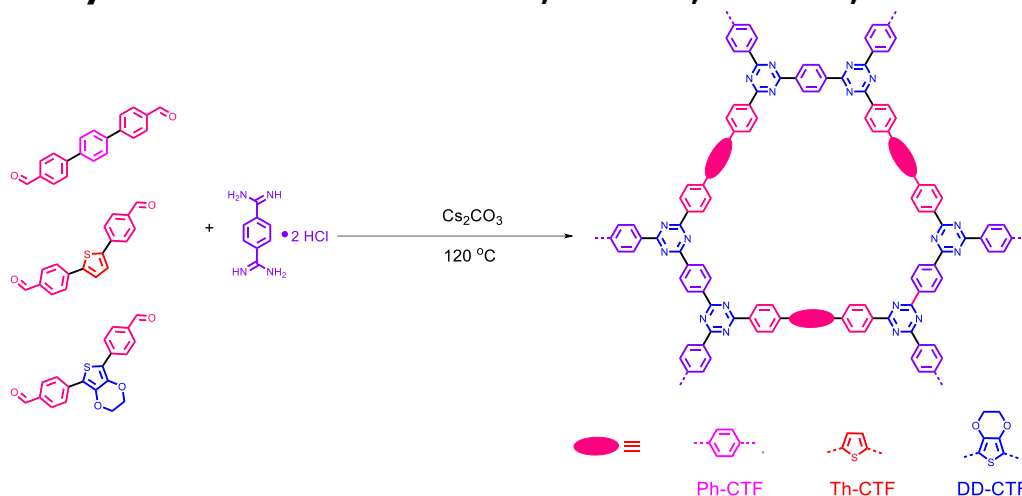

**Scheme S1.** Synthesis routes of Ph-CTF, Th-CTF, and DD-CTF

### 1.1.1 Preparation of 4,4'-(thiophene-2,5-diyl)dibenzaldehyde

A mixture of 2,5-dibromothiophene (1.93 g, 0.01 mol), (4-formylphenyl)boronic acid (3.75g, 0.025 mol), K<sub>2</sub>CO<sub>3</sub> (2.76 g, 0.02 mol), Pd[P(C<sub>6</sub>H<sub>5</sub>)<sub>3</sub>]<sub>4</sub> (115.5 mg, 0.1 mmol) and H<sub>2</sub>O (3.0 mL) in 1,4-dioxane (45.0 mL) was heated to 100 °C under N<sub>2</sub> for 24h. After cooling to room temperature, the reaction mixture was concentrated to remove the solvent and the residue was purified by flash column chromatography to obtain as a white solid in 61 % yield. <sup>1</sup>H NMR (CDCl<sub>3</sub>, 400 MHz): δ 10.0 (s, 2H), 7.92-7.90 (d, *J* = 8.0 Hz, 4H), 7.79-7.78 (d, *J* = 8.0 Hz, 4H), 7.48 (s, 2H) ppm. <sup>13</sup>C NMR (CDCl<sub>3</sub>, 100 MHz): δ 191.5, 143.9, 139.5, 135.5, 130.6, 126.4, 126.0 ppm.

### 1.1.2 Preparation of 4,4'-(2,3-dihydrothieno[3,4-b][1,4]dioxine-5,7-diyl)dibenz-aldehyde

A mixture of 5,7-dibromo-2,3-dihydrothieno[3,4-b][1,4]dioxine (2.98 g, 0.01 mol), (4-formylphenyl)boronic acid (3.75g, 0.025 mol), K<sub>2</sub>CO<sub>3</sub> (2.76 g, 0.02 mol), Pd[P(C<sub>6</sub>H<sub>5</sub>)<sub>3</sub>]<sub>4</sub> (115.5 mg, 0.1 mmol) and H<sub>2</sub>O (3.0 mL) in 1,4-dioxane (45.0 mL) was heated to 100 °C under N<sub>2</sub> for 24h. After cooling to room temperature, the reaction mixture

was concentrated to remove the solvent and the residue was purified by flash column chromatography to obtain as a white solid in 53 % yield.  $^1\text{H}$  NMR ( $\text{CDCl}_3$ , 400 MHz):  $\delta$  9.99 (s, 2H), 7.94-7.92 (d,  $J$  = 8.0 Hz, 4H), 7.89-7.88 (d,  $J$  = 4.0 Hz, 4H), 4.45 (s, 4H) ppm.  $^{13}\text{C}$  NMR ( $\text{CDCl}_3$ , 100 MHz):  $\delta$  191.6, 140.7, 138.6, 134.5, 130.3, 126.3, 116.4, 64.8 ppm.

### 1.1.3 Preparation of Th-CTF

In a typical synthesis, terephthalamidine dihydrochloride (235.2 mg, 1.0 mmol), 4,4'-(thiophene-2,5-diyl)dibenzaldehyde (146.0 mg, 0.5 mmol), and  $\text{Cs}_2\text{CO}_3$  (716.8 mg, 2.2 mmol) were dissolved in dimethyl sulfoxide (DMSO) (20.0 mL) and  $\text{H}_2\text{O}$  (0.2 mL) and then heated to 60 °C, 80 °C, and 100 °C for 12h in a 50 mL round-bottom flask fitted with a condenser under  $\text{N}_2$  atmosphere, separately. The above mixtures were continued to be heated at 120 and 150 °C for 1.5 days respectively before the reaction was complete. The resulting precipitate was filtered and washed with deionized water to remove the inorganic salt, which was further purified by Soxhlet extraction with methanol and THF, respectively. Finally, after being dried at 80 °C under vacuum, a yellow powder was obtained and denoted as Th-CTF in 80% yield. Ph-CTF and DD-CTF were obtained according to the same procedures as Th-CTF by performing [1,1':4',1''-terphenyl]-4,4''-dicarbaldehyde and 4,4'-(2,3-dihydrothieno[3,4-b][1,4]dioxine5,7diyl)dibenzaldehyde as the starting monomers.

## 1.2 General procedures for photocatalysis

### Procedure I for photocatalytic Ugi reaction.

Typically, a mixture of *N,N*,4-trimethylaniline (40.6 mg, 0.30 mmol),  $\text{H}_2\text{O}$  (0.2 mL), DD-CTF (20 mg), and ethyl 2-isocyanoacetate (67.87 mg, 0.60 mmol) in  $\text{CH}_3\text{CN}$  (3.0 mL) were stirred at room temperature under  $\text{O}_2$  atmosphere (1.0 atm) while irradiated with 14 W blue LEDs

(0.2 W/cm<sup>2</sup>). After the reaction completion monitoring by TLC, the solvent was removed to give the residues, which could be further obtained by flash column chromatography with petroleum ether/ethyl acetate as the eluent.

### **Procedure II for photocatalytic synthesis of Thiocarbamates.**

A mixture of 4-methylbenzenethiol (37.3 mg, 0.30 mmol), ethyl 2-isocyanoacetate (67.87 mg, 0.60 mmol), H<sub>2</sub>O (0.2 mL), and DD-CTF (20 mg) in ethyl acetate (3.0 mL) were stirred at room temperature in the presence of O<sub>2</sub> atmosphere while irradiated with 14 W blue LEDs (0.2 W/cm<sup>2</sup>). Upon the completion of reaction as monitored by TLC, the solvent was then removed under vacuum to give the residues, which could be further obtained by flash column chromatography with PE/EA (10:1-1:1) as the eluent.

### **Procedure III for photocatalytic oxidative S-P(O) coupling**

Typically, a mixture of 4-methylbenzenethiol (37.3 mg, 0.30 mmol), diphenylphosphine oxide (121.3 mg, 0.60 mmol), and DD-CTF (20 mg) in DMF (3.0 mL) were stirred at room temperature under O<sub>2</sub> atmosphere (1.0 atm) while irradiated with 14 W blue LEDs (0.2 W/cm<sup>2</sup>). After the reaction completion monitoring by TLC, the solvent was removed to give the residues, which could be further obtained by flash column chromatography with petroleum ether/ethyl acetate as the eluent.

## 2. Measurements

The  $^1\text{H}$  and  $^{13}\text{C}$  NMR spectra were measured with the deuterated solvents (Bruker AM-400 MHz NMR spectrometer). The corresponding Fourier transform infrared (FT-IR) spectra were measured in the  $400\text{-}4000\text{ cm}^{-1}$  region (VARIAN 1000 FT-IR spectrometer). The solid-state  $^{13}\text{C}$  CP/MAS NMR spectra were obtained on a Bruker AVANCE III 400 MHz spectrometer. To calculate the surface area and pore volume of the polymers, the Brunauer-Emmett Teller (BET) approach was employed with the application rate of 77 K and the specimens dried in vacuum at  $100^\circ\text{C}$  during 14 h prior to measurement (Micromeritics ASAP 2020M). The distribution of the pore size of the polymers were acquired by means of sorption branching (non-local density functional theory approach, NLDFT). The surfaces of the polymers were characterized by an acceleration pressure from 8.0 kV (FEI SIRION200). The UV-Vis adsorption spectra of the powders in the solid state were obtained on a Scan UV-Vis spectrophotometer (U-4100 spectrometer). The Mott-Schottky analysis and electrochemical impedance spectrum (EIS) were carried out at a dark galvanic workstation at room temperature (CHI760E). Optical current testing of the obtained CTFs such as photocurrent response was conducted on a VersaSTAT 3 galvanic workstation and a 300W Xe lamp. Analysis of temporally dependent luminescence spectra of physical specimens was conducted using the FLS-980 fluorescence lifetime chromatograph. DFT calculations were carried out in the Gaussian 09W program package. Gaussian View 5.0 was used for visualization. The geometry calculation was optimized with the B3LYP/6-31G(d) theory level.

### 3. Characterization

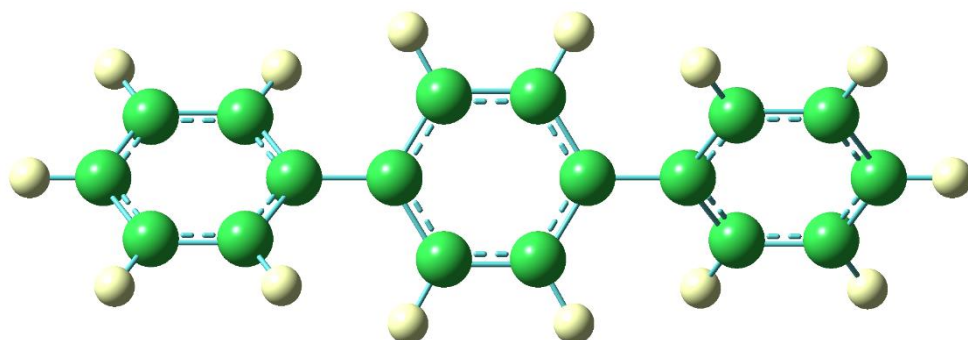

**Figure S1.** Diagram of molecular dipoles for 1,1':4',1''-terphenyl units (0.000 Debye).

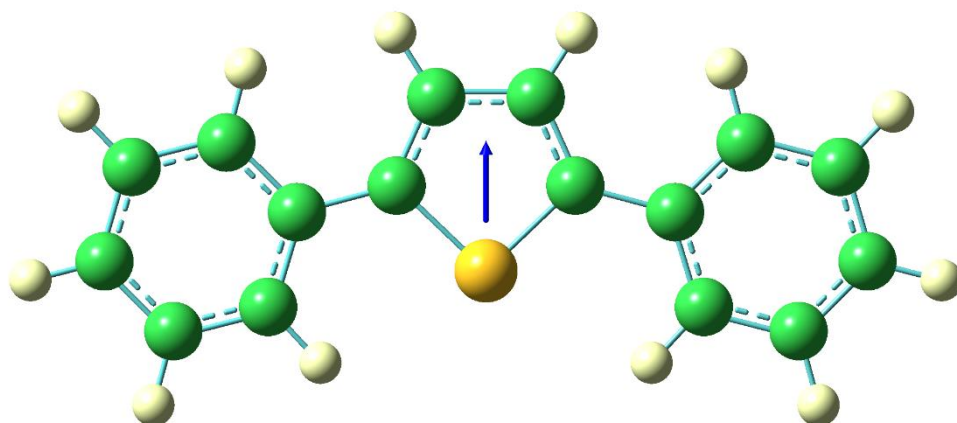

**Figure S2.** Diagram of molecular dipoles for 1,1':4',1''-terphenyl units (0.5586 Debye).

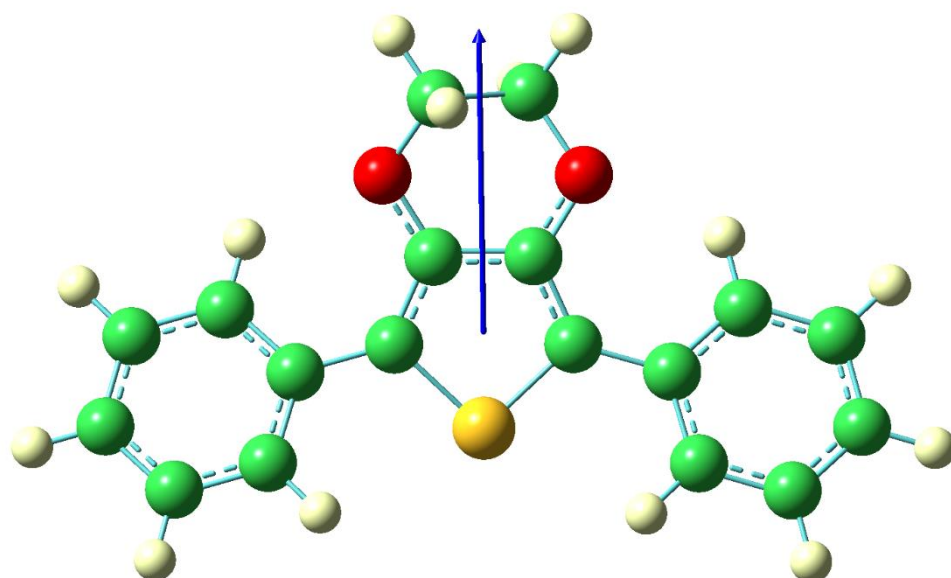

**Figure S3.** Diagram of molecular dipoles for 1,1':4',1''-terphenyl

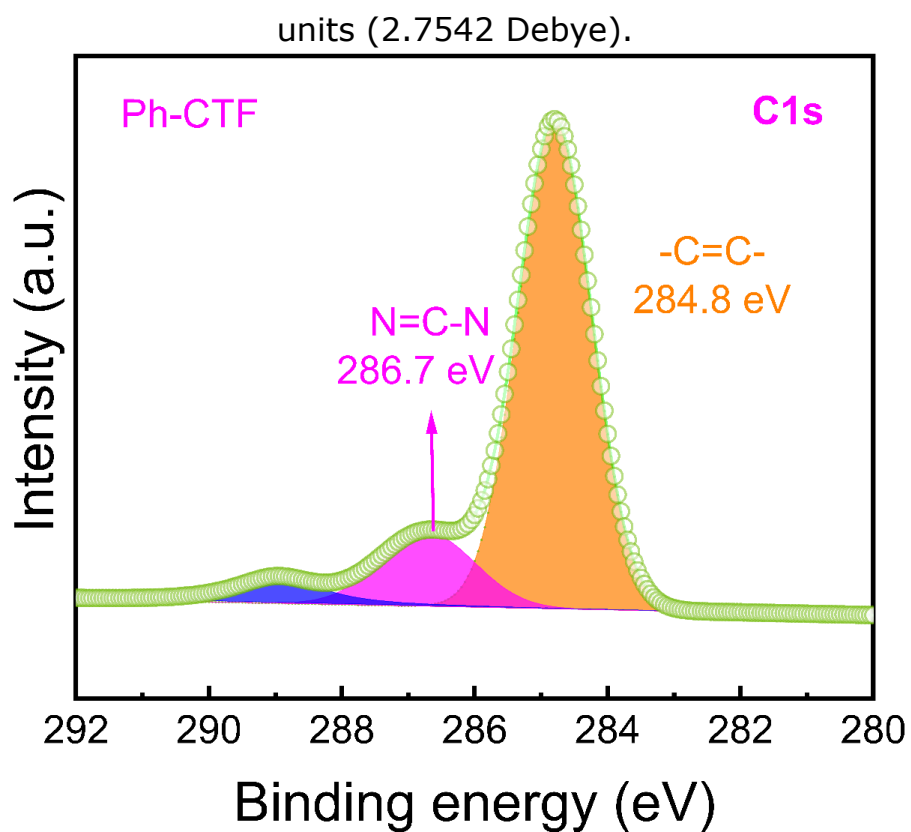

**Figure S4.** High-resolution XPS C1 s spectrum of Ph-CTF

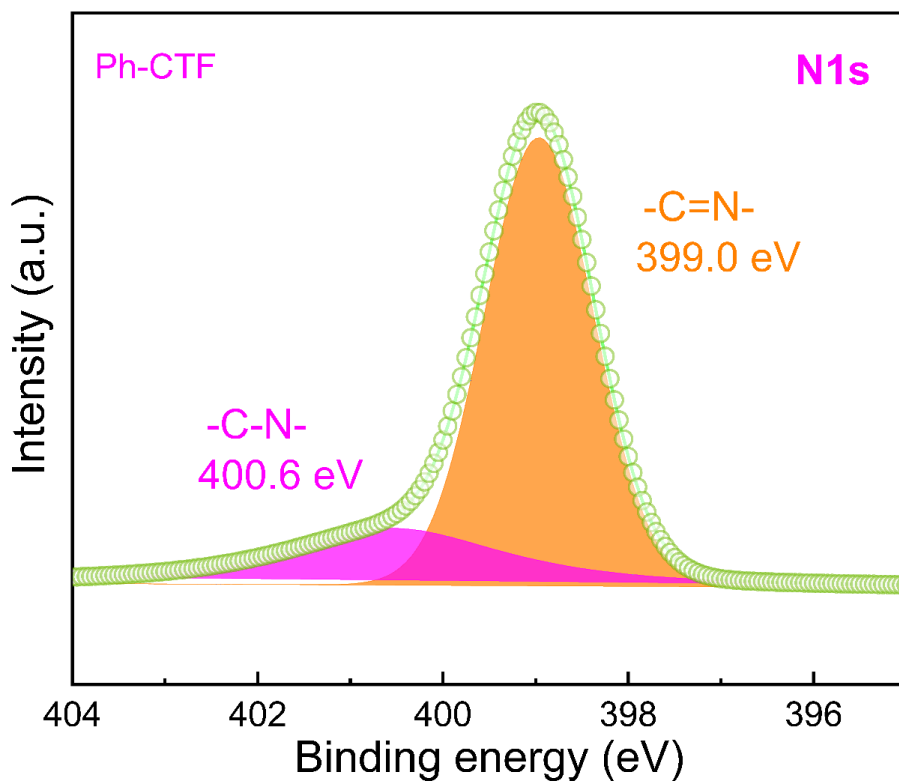

**Figure S5.** High-resolution XPS N1 s spectrum of Ph-CTF



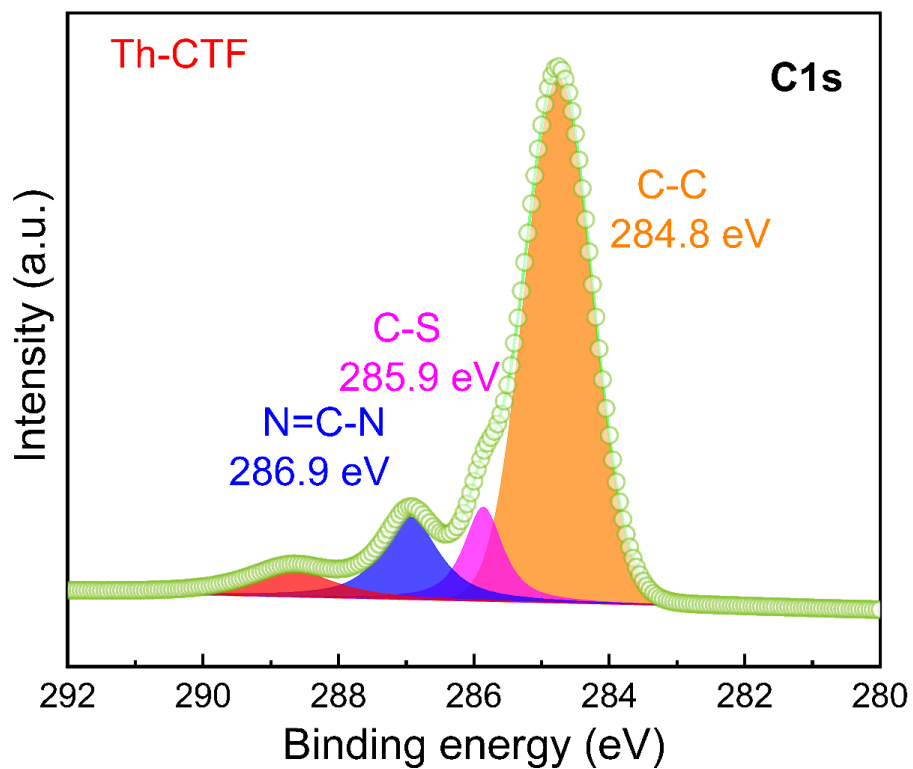

**Figure S6.** High-resolution XPS C1 s spectrum of Th-CTF

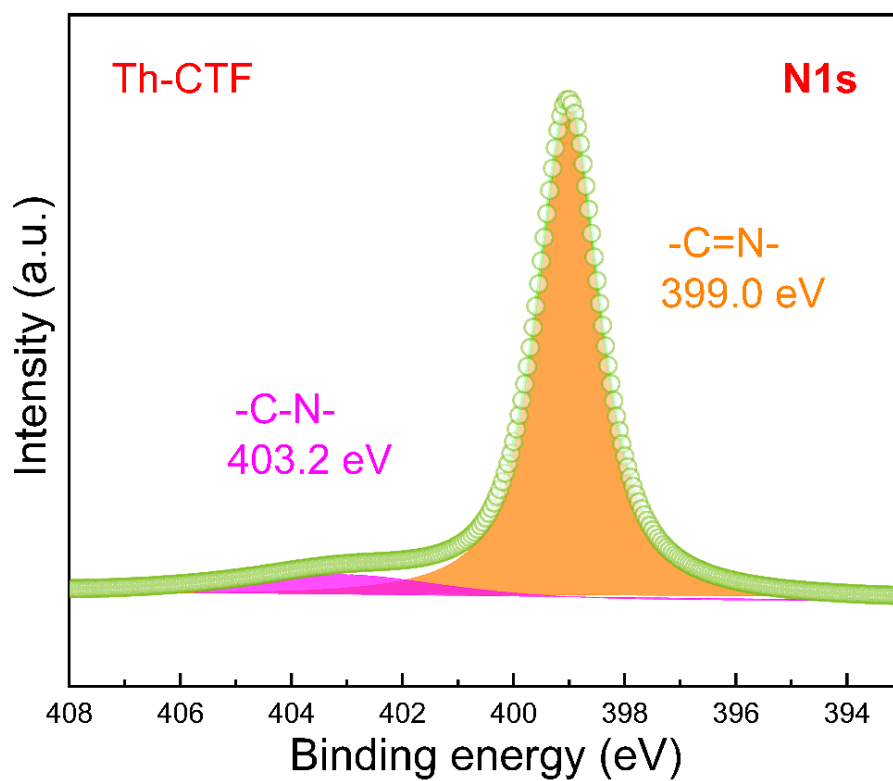

**Figure S7.** High-resolution XPS N1 s spectrum of Th-CTF

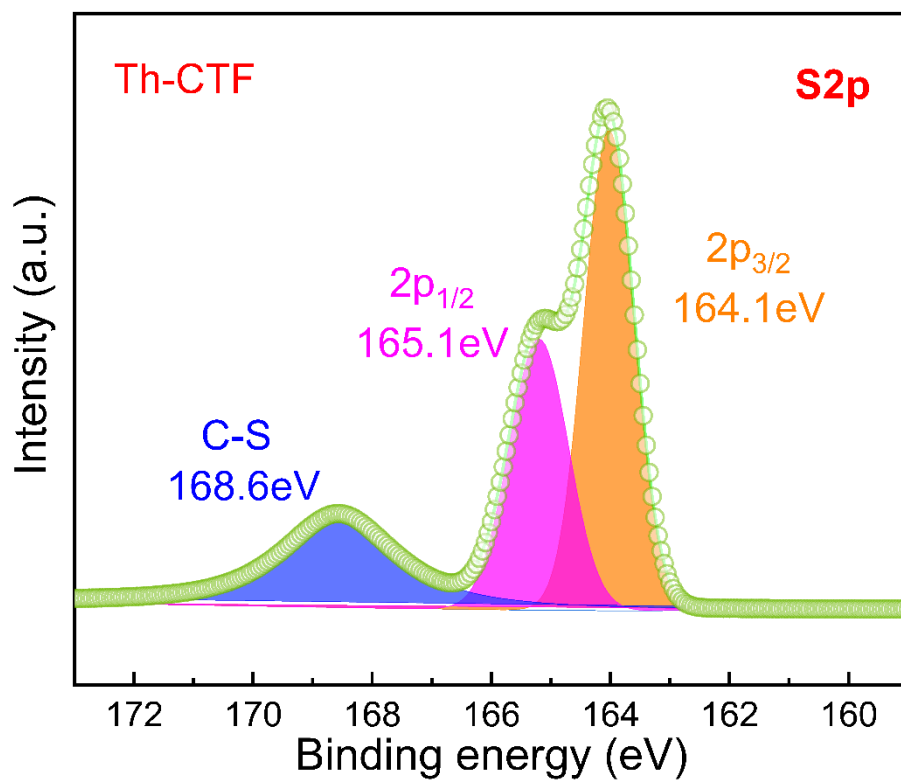

**Figure S8.** High-resolution XPS S 2p spectrum of Th-CTF

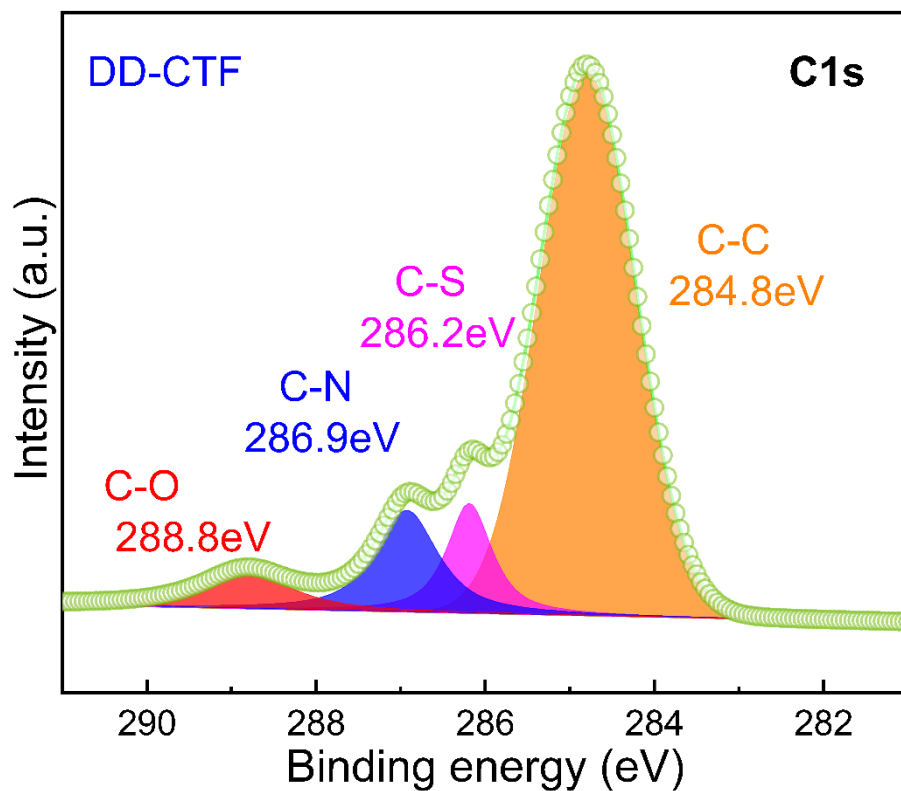

**Figure S9.** High-resolution XPS C1 s spectrum of DD-CTF

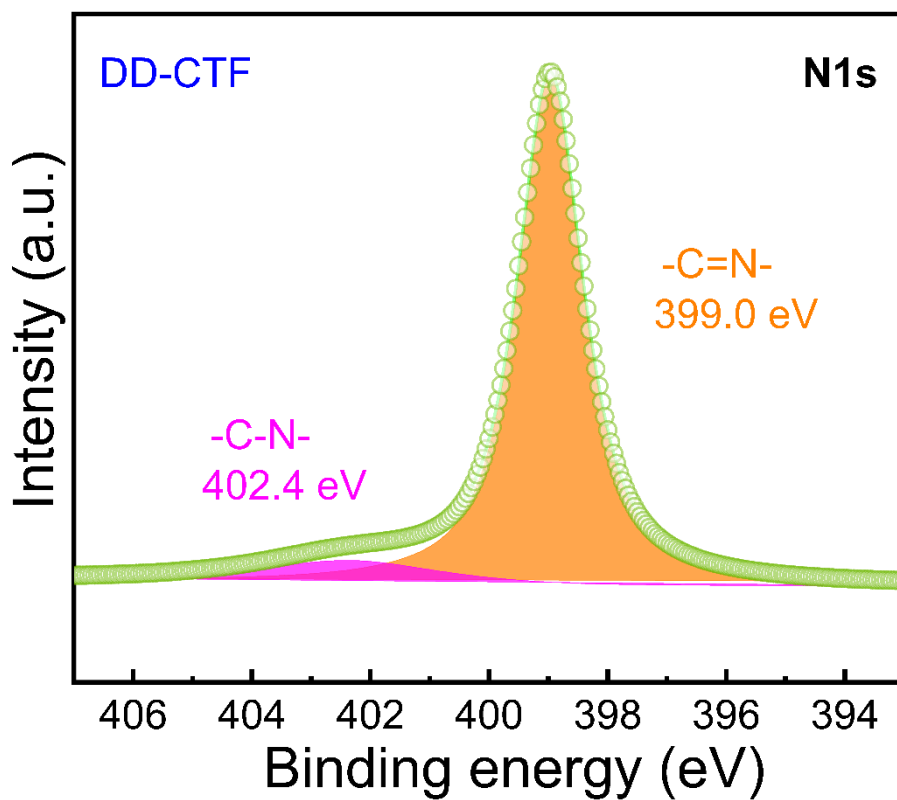

**Figure S10.** High-resolution XPS N1 s spectrum of DD-CTF

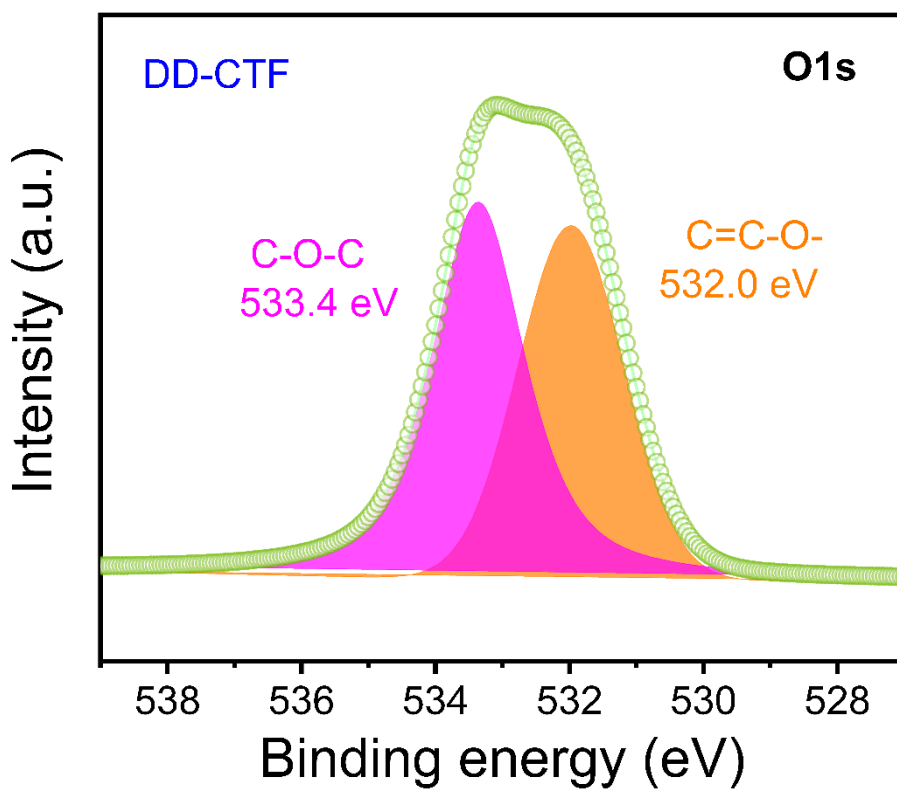

**Figure S11.** High-resolution XPS O1 s spectrum of DD-CTF

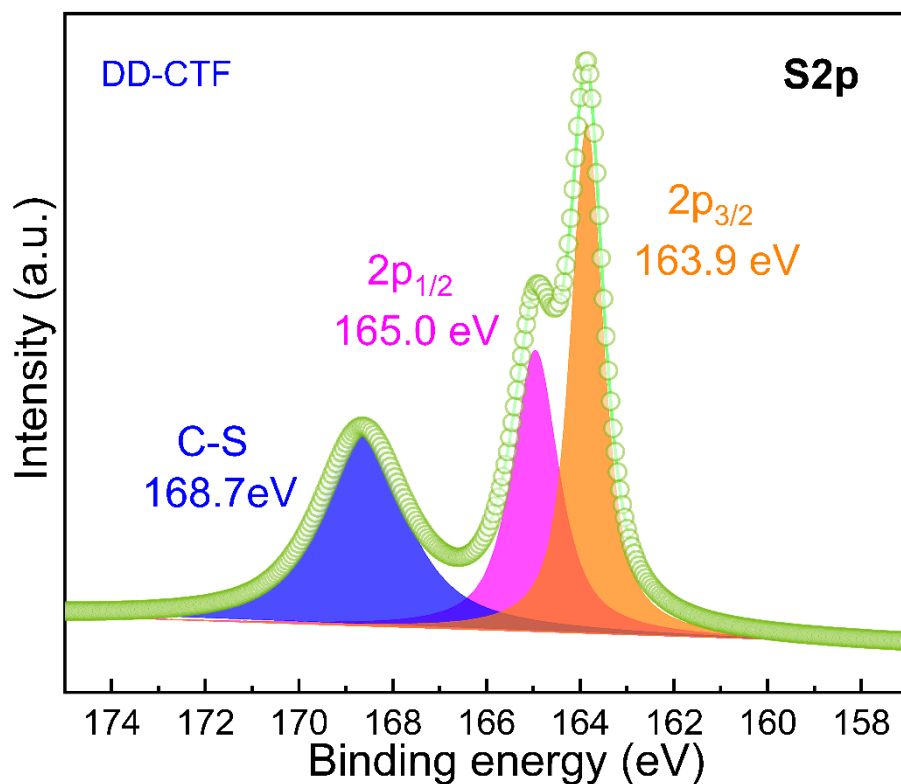

**Figure S12.** High-resolution XPS S 2p spectrum of DD-CTF

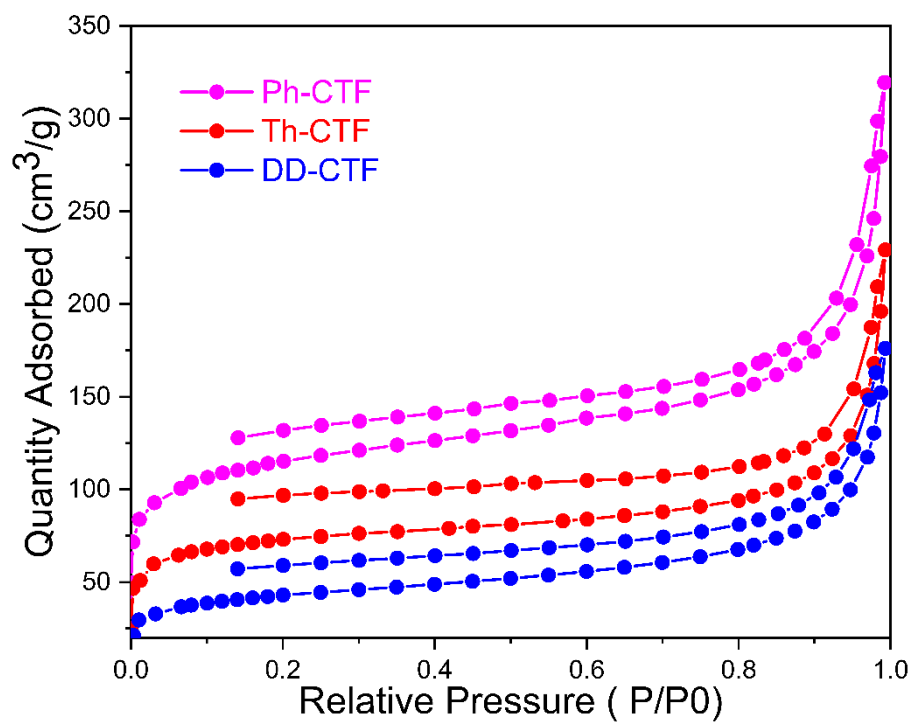

**Figure S13.** Nitrogen sorption isotherms of Ph-CTF, Th-CTF and DD-CTF at 77 K

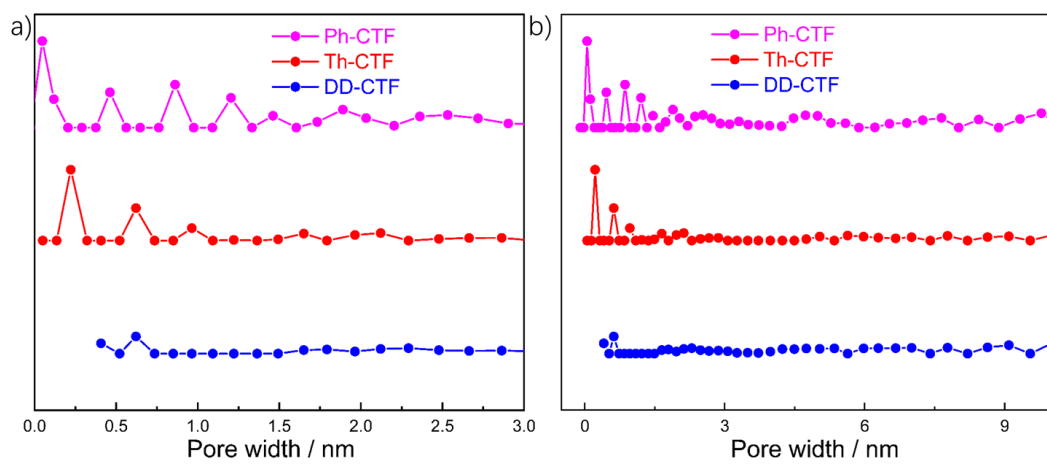

**Figure S14.** Pore size distributions of Ph-CTF, Th-CTF and DD-CTF

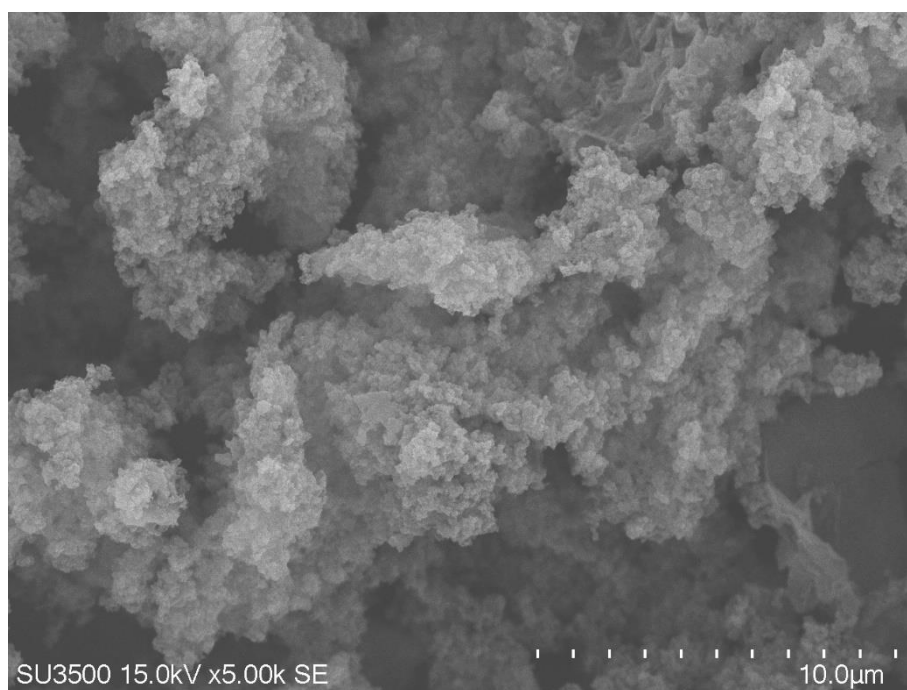

**Figure S15.** SEM of Ph-CTF

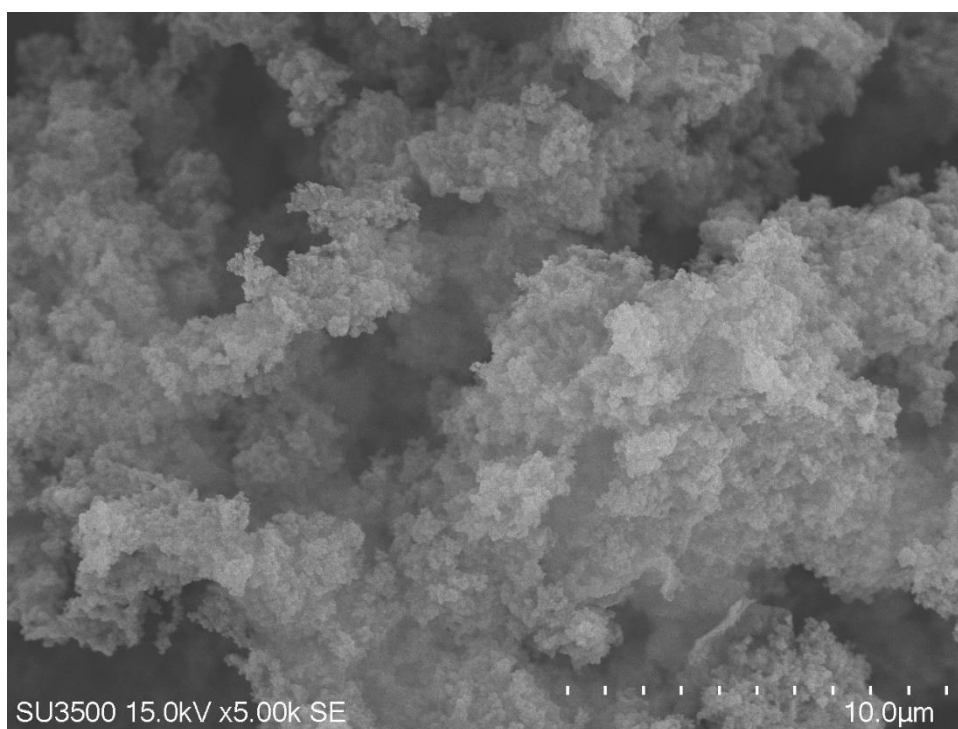

**Figure S16.** SEM of Th-CTF

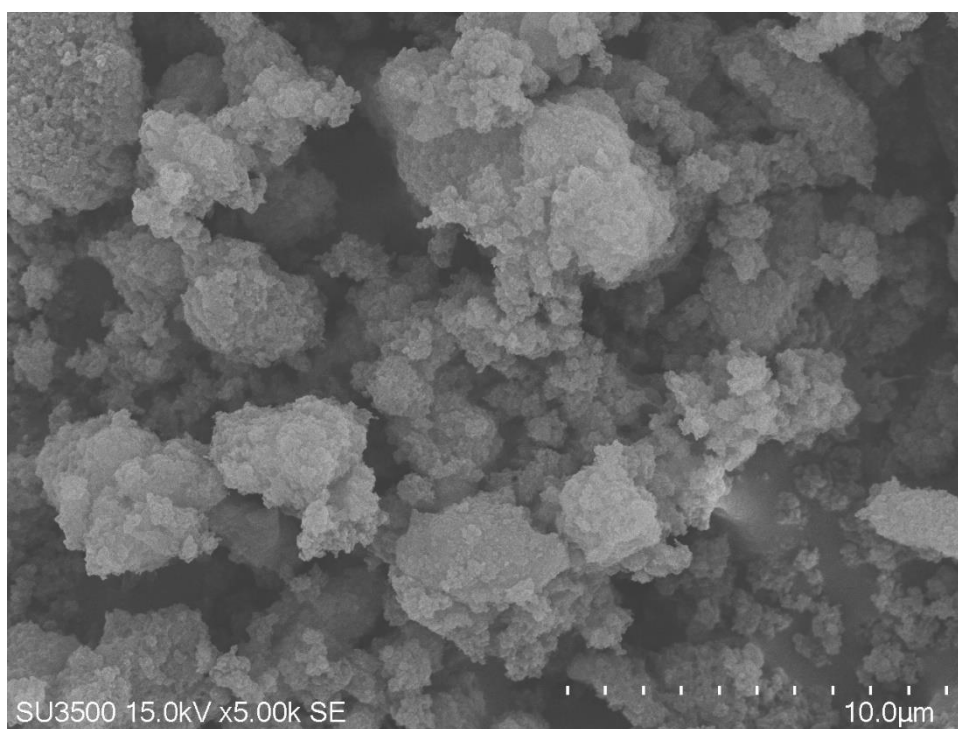

**Figure S17.** SEM of DD-CTF

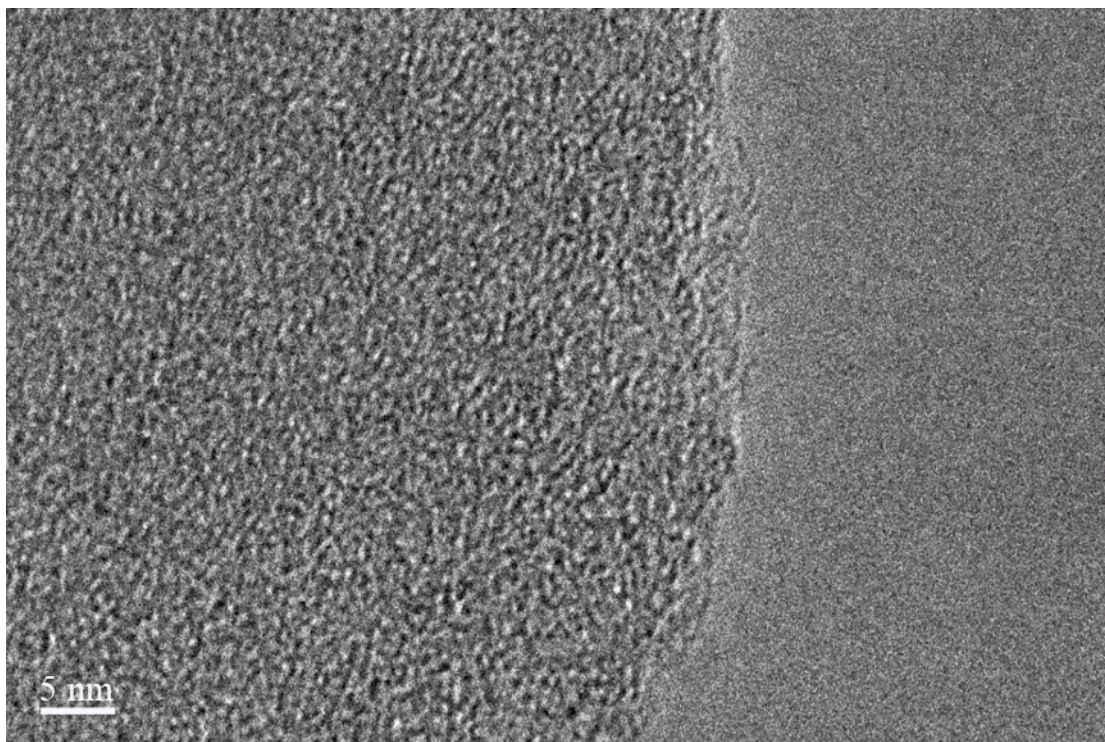

**Figure S18.** TEM of Ph-CTF

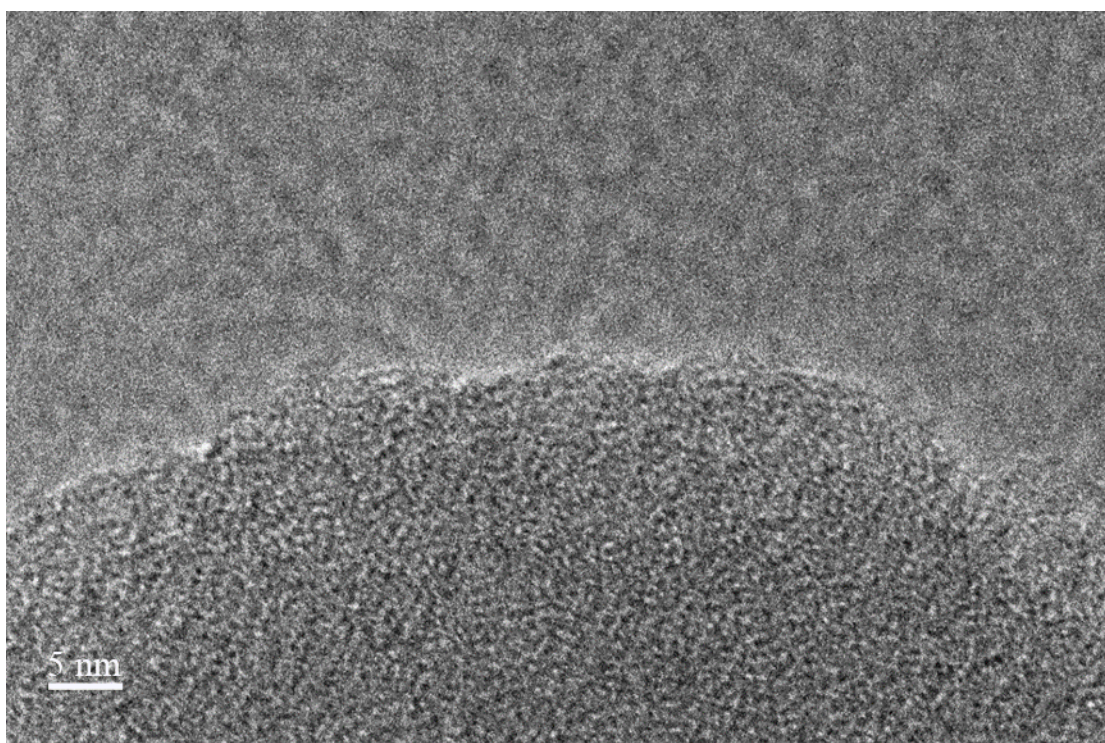

**Figure S19.** TEM of Th-CTF

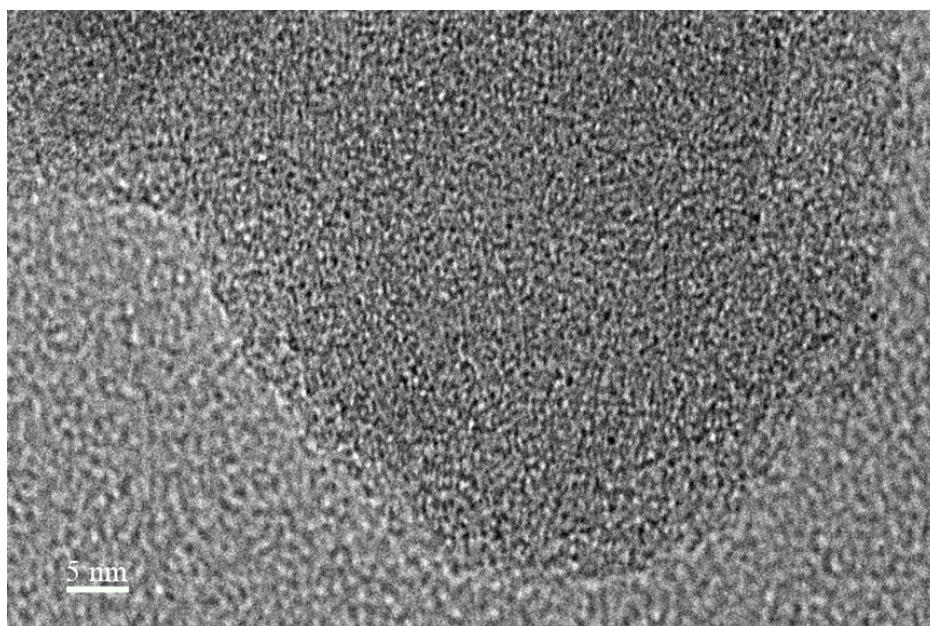

**Figure S20.** TEM of DD-CTF

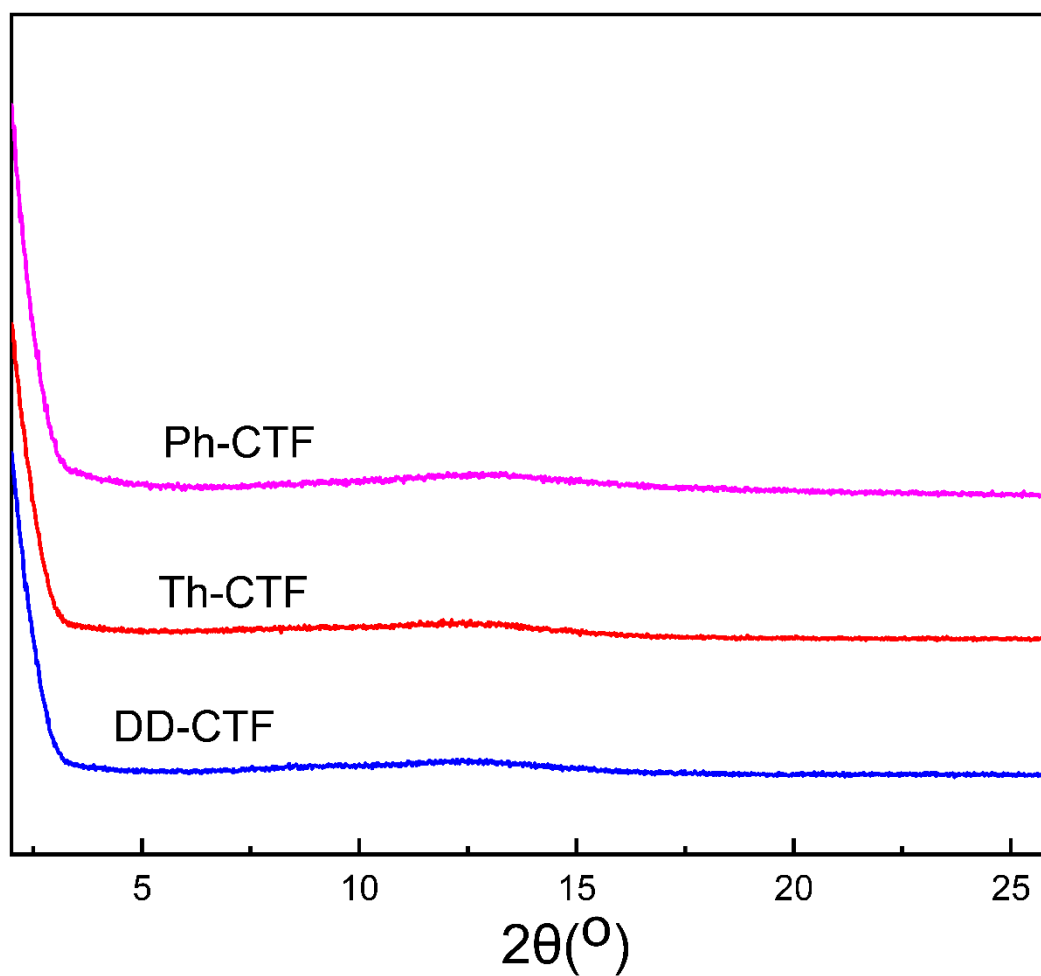

**Figure S21.** XRD of Ph-CTF, Th-CTF, and DD-CTF



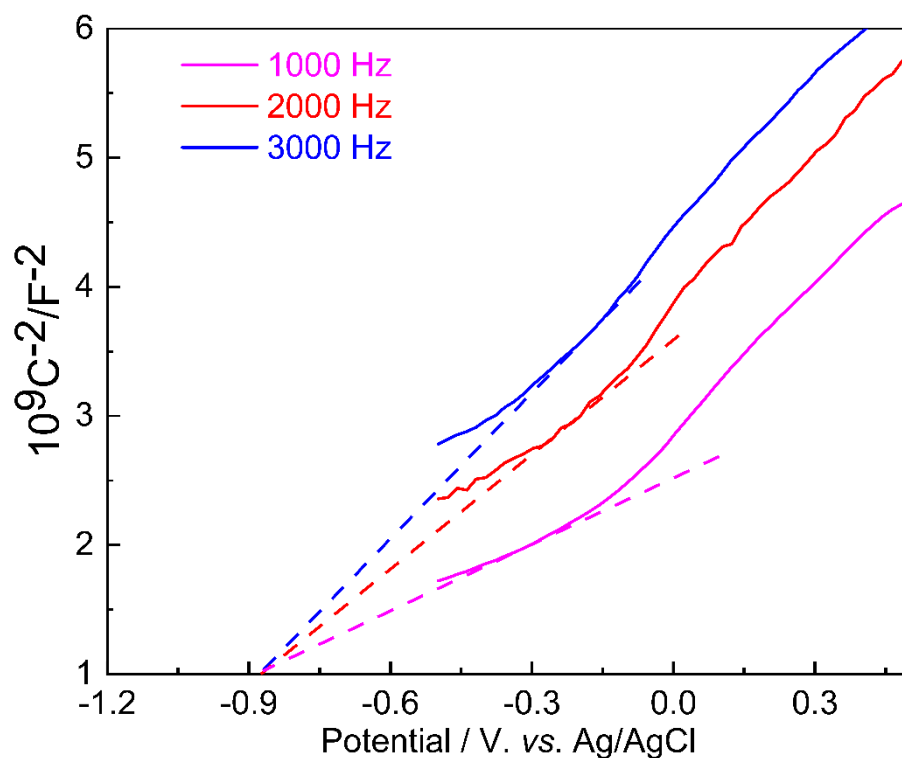

**Figure S22.** Mott-Schottky plots for Ph-CTF in 0.2 M Na<sub>2</sub>SO<sub>4</sub> aqueous solution at 1000, 2000 and 3000 Hz

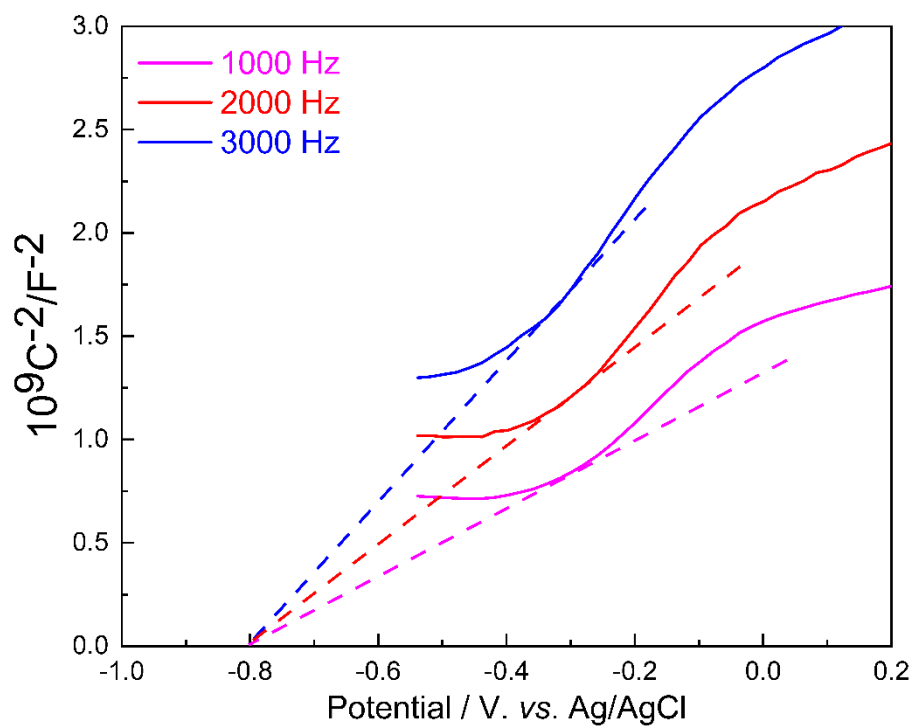

**Figure S23.** Mott-Schottky plots for Th-CTF in 0.2 M Na<sub>2</sub>SO<sub>4</sub> aqueous solution at 1000, 2000 and 3000 Hz

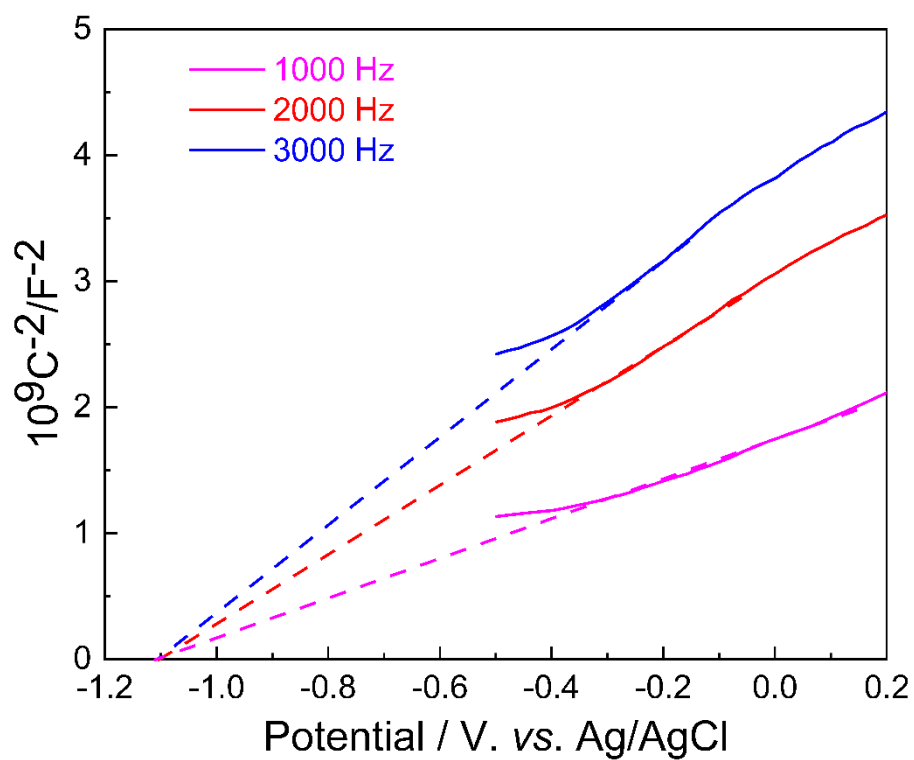

**Figure S24.** Mott-Schottky plots for DD-CTF in 0.2 M Na<sub>2</sub>SO<sub>4</sub> aqueous solution at 1000, 2000 and 3000 Hz

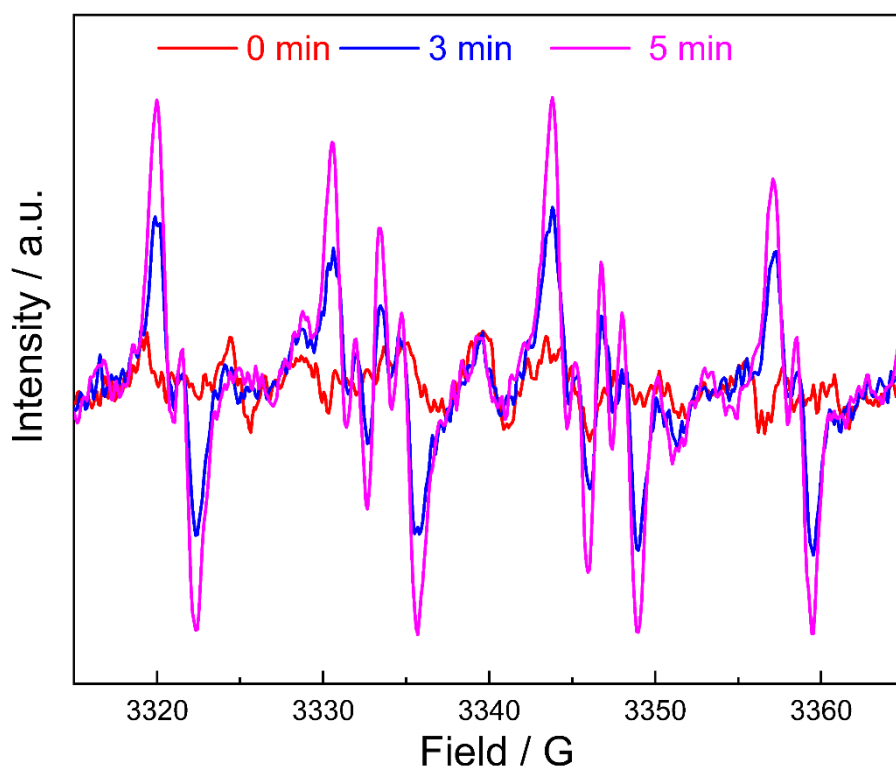

**Figure S25.** EPR spectra of DMPO- O<sub>2</sub><sup>•-</sup> for DD-CTF

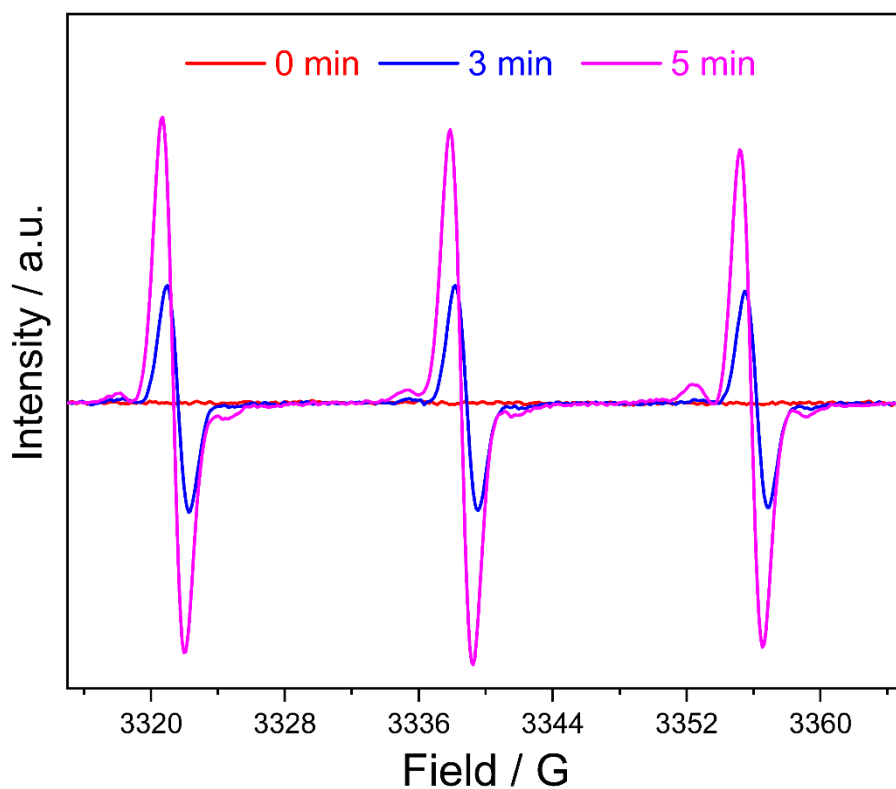

**Figure S26.** EPR spectra of TEMP-<sup>1</sup>O<sub>2</sub> for DD-CTF

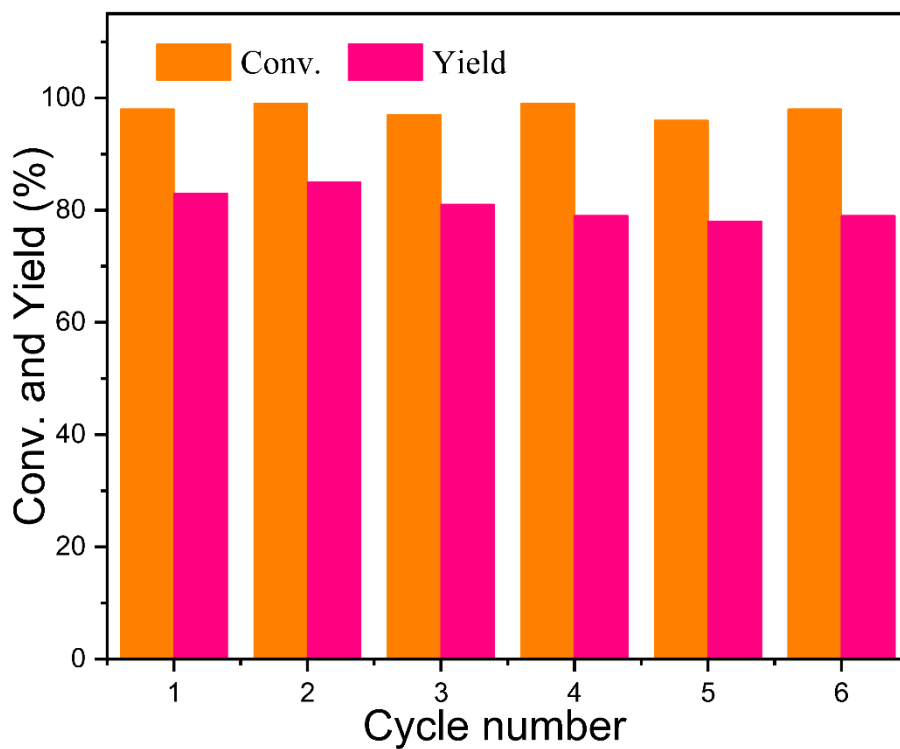

**Figure S27.** Recycle experiments with DD-CTF for Ugi reactions

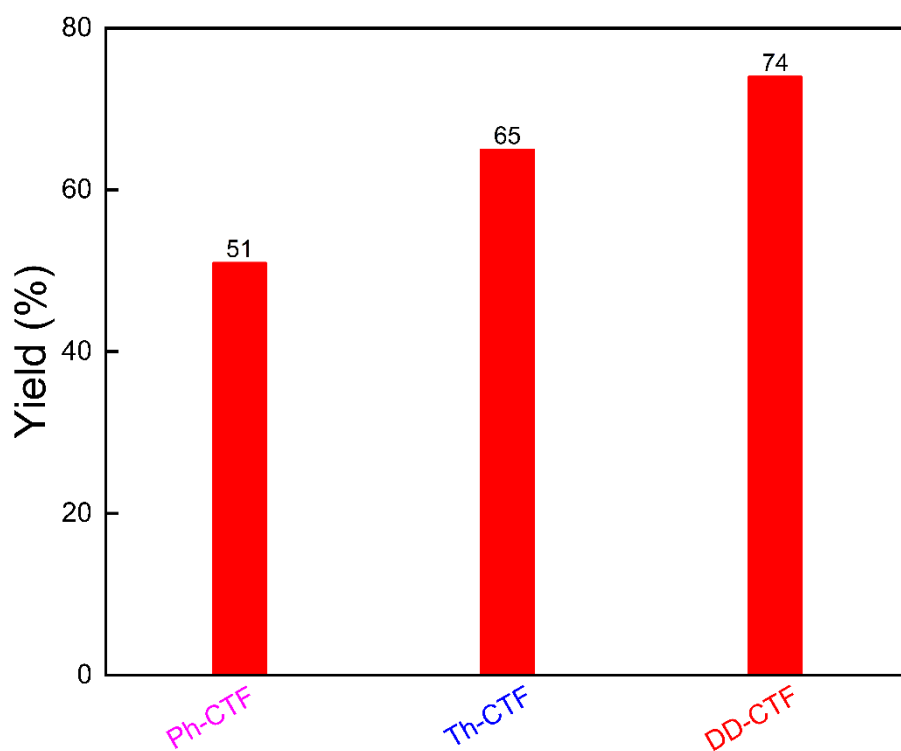

**Figure S28.** Photocatalyst Screening for Thiocarbamates.

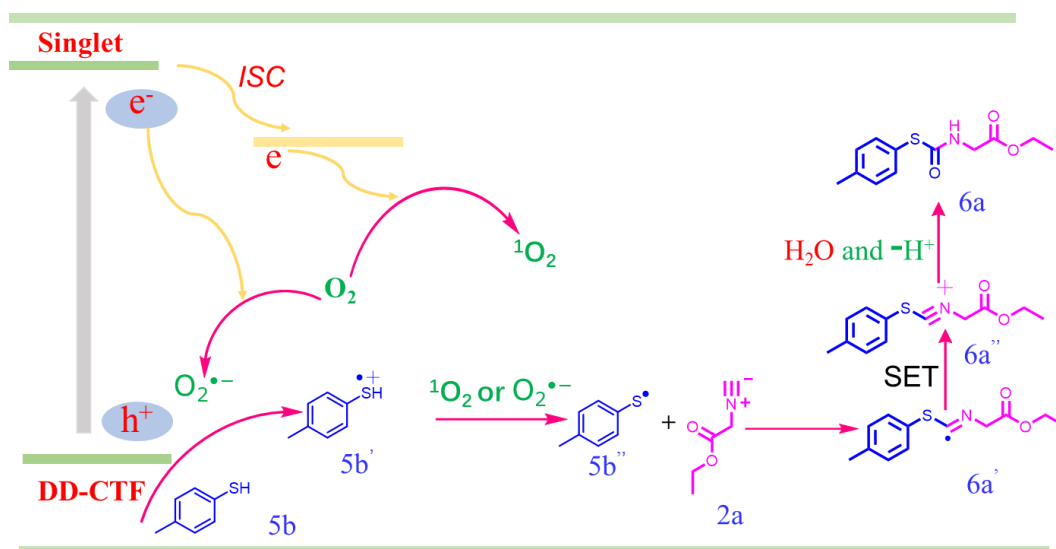

**Figure S29.** Proposed photocatalytic mechanism for thiocarbamates

**Table S1.** Optimization of Reaction Conditions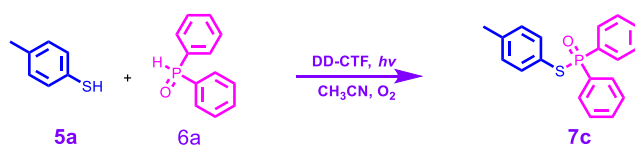

| Entry | Photocatalyst | Reaction condition variations     | Yield (%) |
|-------|---------------|-----------------------------------|-----------|
| 1     | Ph-CTF        | DMF                               | 77        |
| 2     | Th-CTF        | DMF                               | 86        |
| 3     | DD-CTF        | DMF                               | 94        |
| 4     | DD-CTF        | $\text{CH}_3\text{CN}$            | 68        |
| 5     | DD-CTF        | THF                               | 56        |
| 6     | DD-CTF        | $\text{CHCl}_3$                   | 37        |
| 7     | DD-CTF        | $\text{H}_2\text{O}$              | 17        |
| 8     | DD-CTF        | $\text{CH}_3\text{OH}$            | 29        |
| 9     | DD-CTF        | no $\text{O}_2$                   | <10       |
| 10    | -             | DMF                               | Trace     |
| 11    | DD-CTF        | KI                                | 22%       |
| 12    | DD-CTF        | $\text{Na}_2\text{C}_2\text{O}_4$ | Trace     |
| 13    | DD-CTF        | $\text{O}_2^{\bullet-}$ scavenger | 16%       |
| 14    | DD-CTF        | $^1\text{O}_2$ scavenger          | 11%       |
| 15    | DD-CTF        | TEMPO                             | trace     |
| 16    | DD-CTF        | BHT                               | trace     |

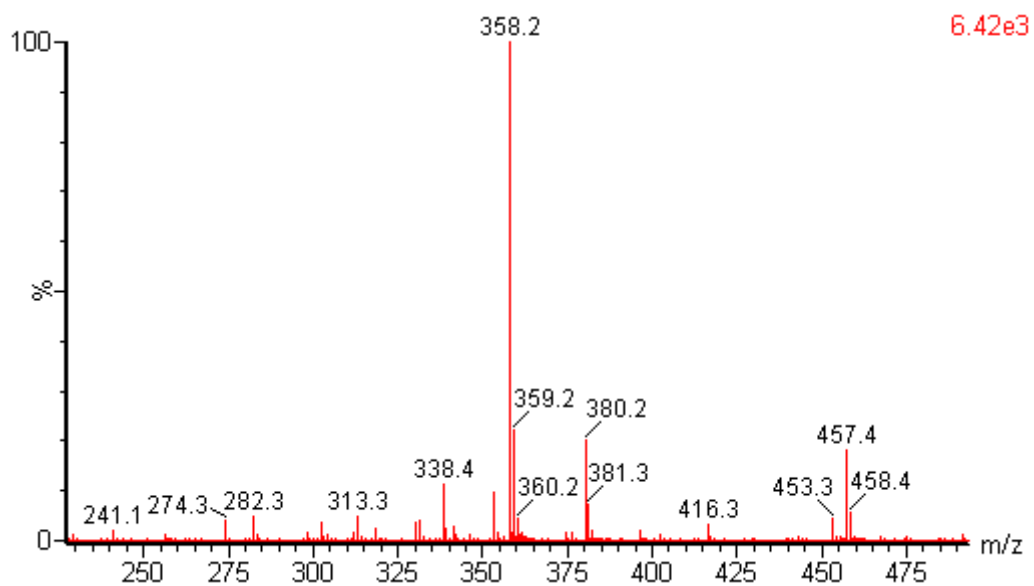

**Figure S30.** a radical capture experiment with TEMPO for diphenylphosphine oxide

## 4. <sup>1</sup>H NMR and <sup>13</sup>C NMR spectra

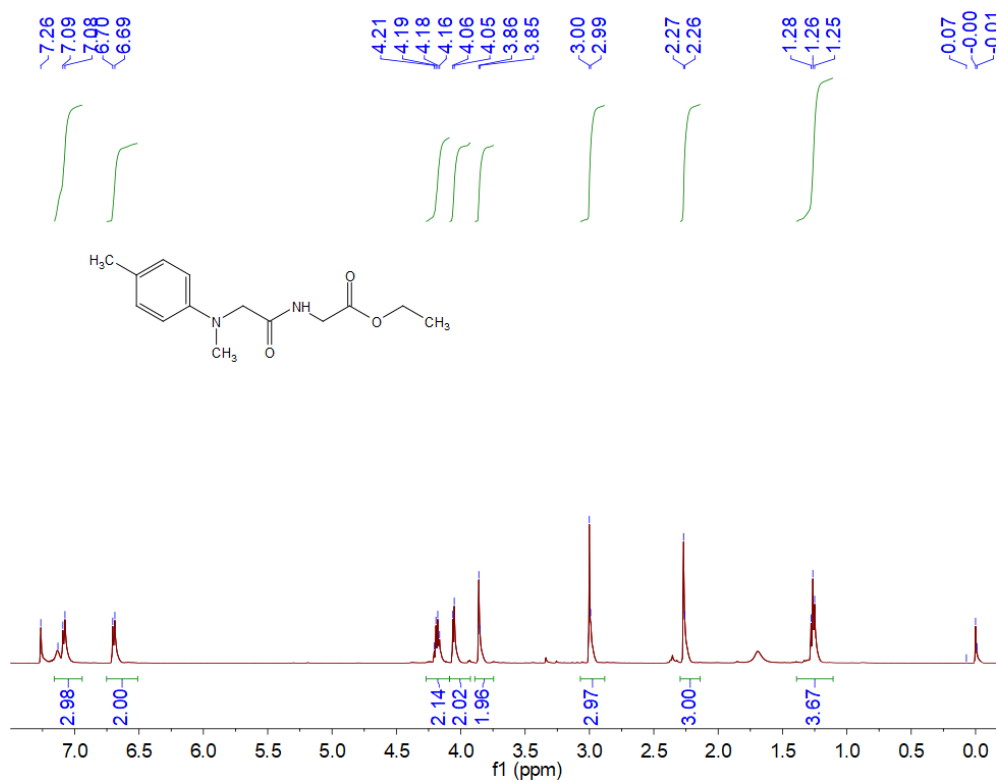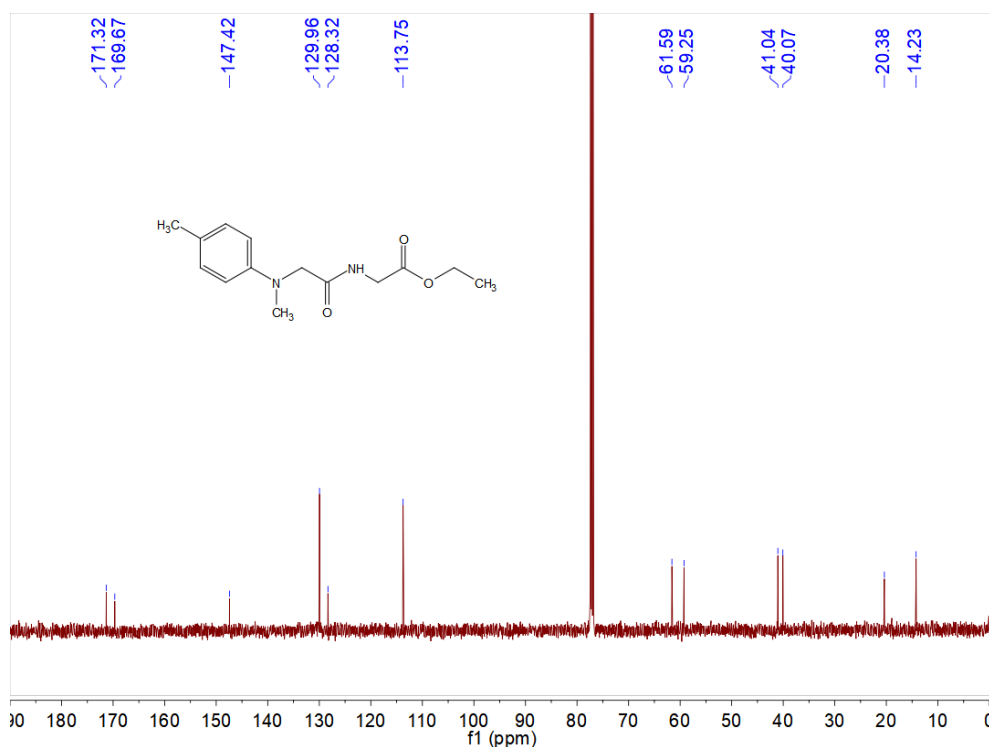

**Ethyl N-methyl-N-(p-tolyl)glycylglycinate:** <sup>1</sup>H NMR (CDCl<sub>3</sub>, 400 MHz): δ 7.13 (s, 1H), 7.09-7.08(d, J = 4.0 Hz, 2H), 7.70-7.08(d, J = 4.0 Hz, 2H), 4.21-4.16 (m, 2H), 4.06-4.05 (d, J = 4.0 Hz, 2H), 3.00 (s, 3H), 2.26 (s, 3H), 1.28-1.25 (m, 3H). <sup>13</sup>C NMR (CDCl<sub>3</sub>, 100 MHz):

$\delta$  171.3, 169.7, 147.4, 130.0, 128.3, 113.8, 61.6, 59.2, 41.0, 41.1, 20.4, 14.2.

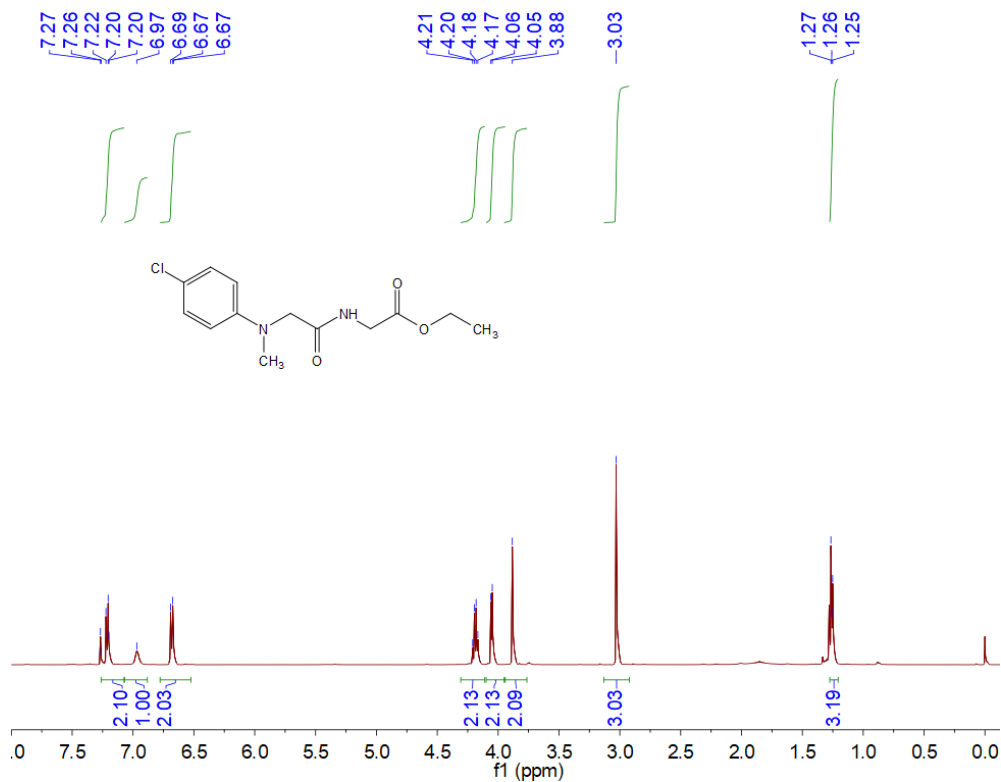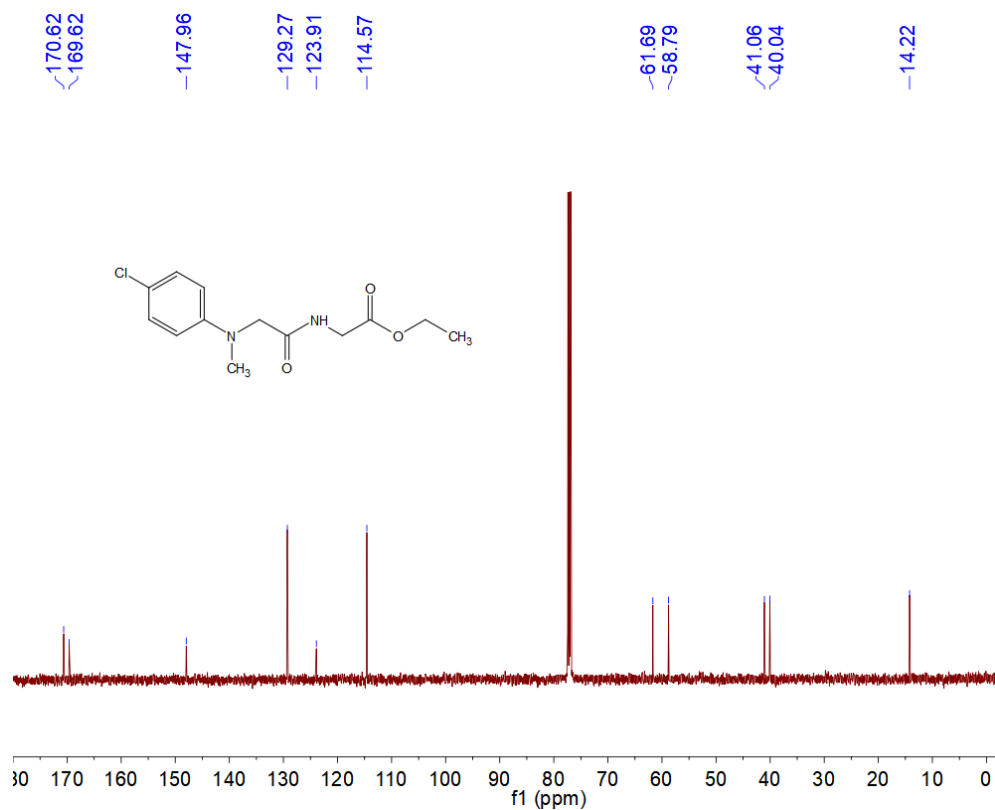



**Ethyl N-(4-chlorophenyl)-N-methylglycylglycinate:**  $^1\text{H}$  NMR ( $\text{CDCl}_3$ , 400 MHz):  $\delta$  7.26-7.22(d,  $J = 8.0$  Hz, 2H), 7.20 (s, 1H), 6.69-6.678(d,  $J = 8.0$  Hz, 2H), 4.21-4.17 (m, 2H), 4.06-4.05 (d,  $J = 4.0$  Hz, 2H), 3.88 (s, 2H), 3.00 (s, 3H), (1.27-1.25 (m, 3H).  $^{13}\text{C}$  NMR ( $\text{CDCl}_3$ , 100 MHz):  $\delta$  170.6, 169.6, 148.0, 129.3, 123.9, 114.6, 61.7, 58.8, 41.1, 40.0, 14.2.

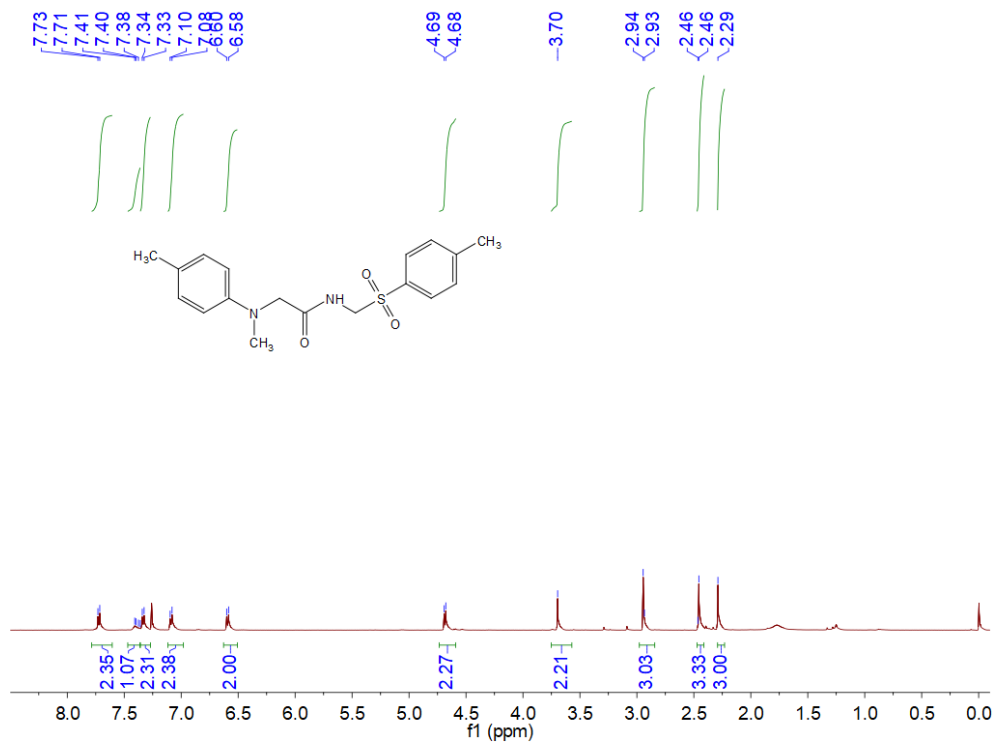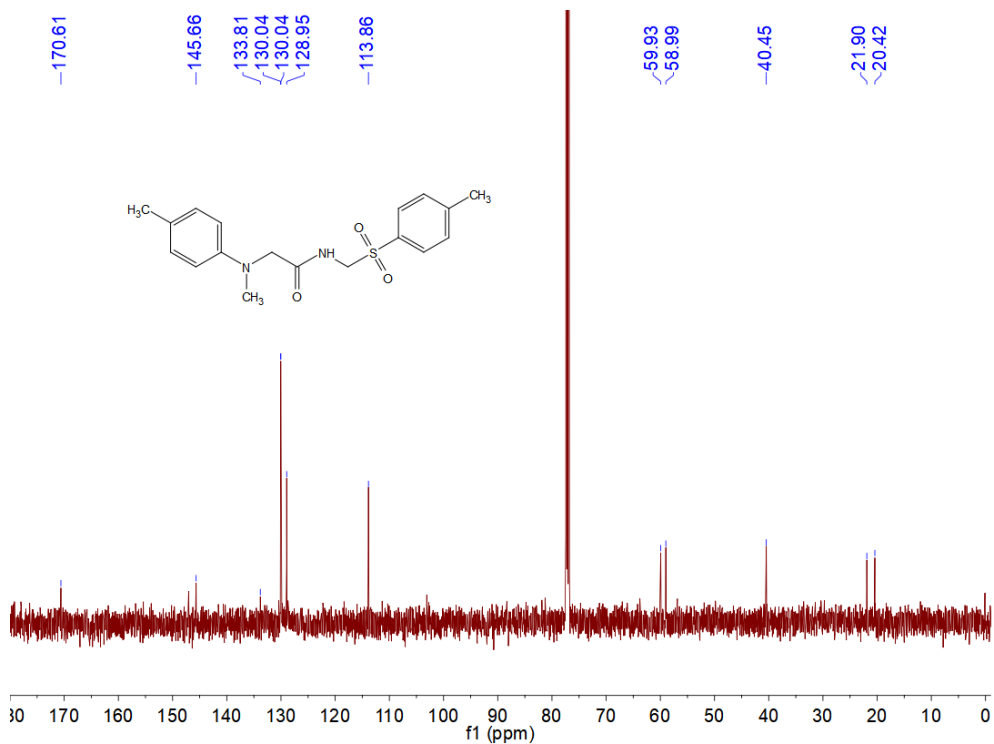

**2-(methyl(*p*-tolyl)amino)-*N*-(tosylmethyl)acetamide:**  $^1\text{H}$  NMR ( $\text{CDCl}_3$ , 400 MHz):  $\delta$  7.73-7.71(d,  $J = 8.0$  Hz, 2H), 7.41 (s, 1H), 7.34-7.33(d,  $J = 8.0$  Hz, 2H), 7.10-7.08(d,  $J = 8.0$  Hz, 2H), 6.60-6.58 (d,  $J = 8.0$  Hz, 2H), 4.69-4.68 (d,  $J = 4.0$  Hz, 2H), 3.70 (s, 2H), 2.94 (s, 3H), 2.46 (s, 3H), 2.29 (s, 3H).  $^{13}\text{C}$  NMR ( $\text{CDCl}_3$ , 100 MHz):  $\delta$  170.6, 145.7, 133.8, 130.0, 128.9, 113.9, 59.9, 59.0, 40.4, 21.9, 20.4.

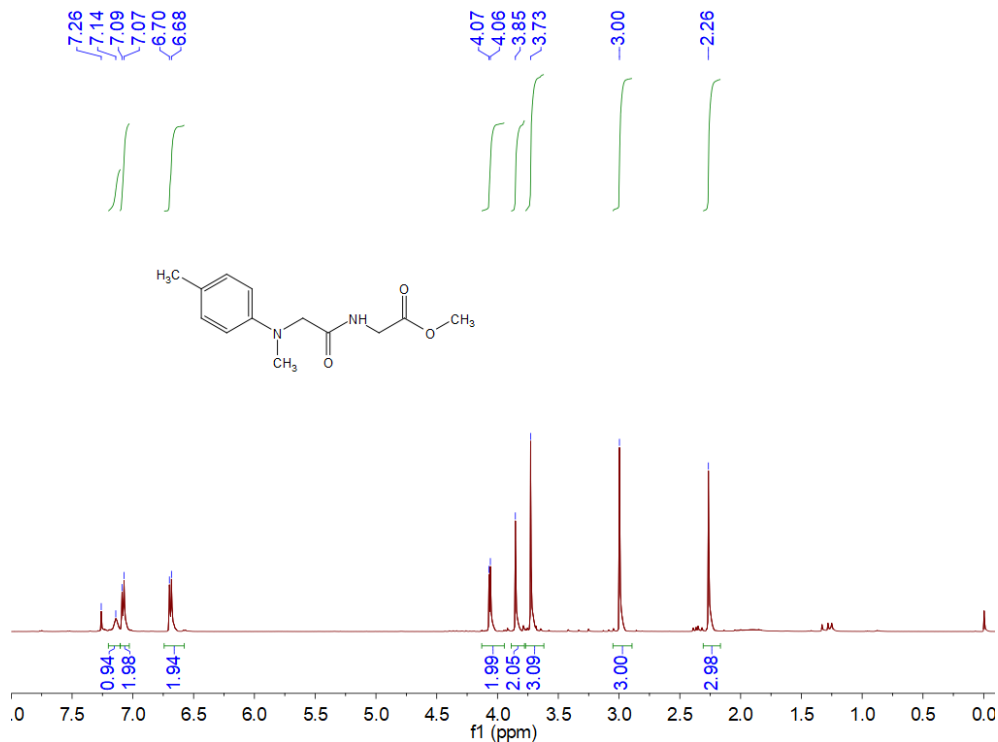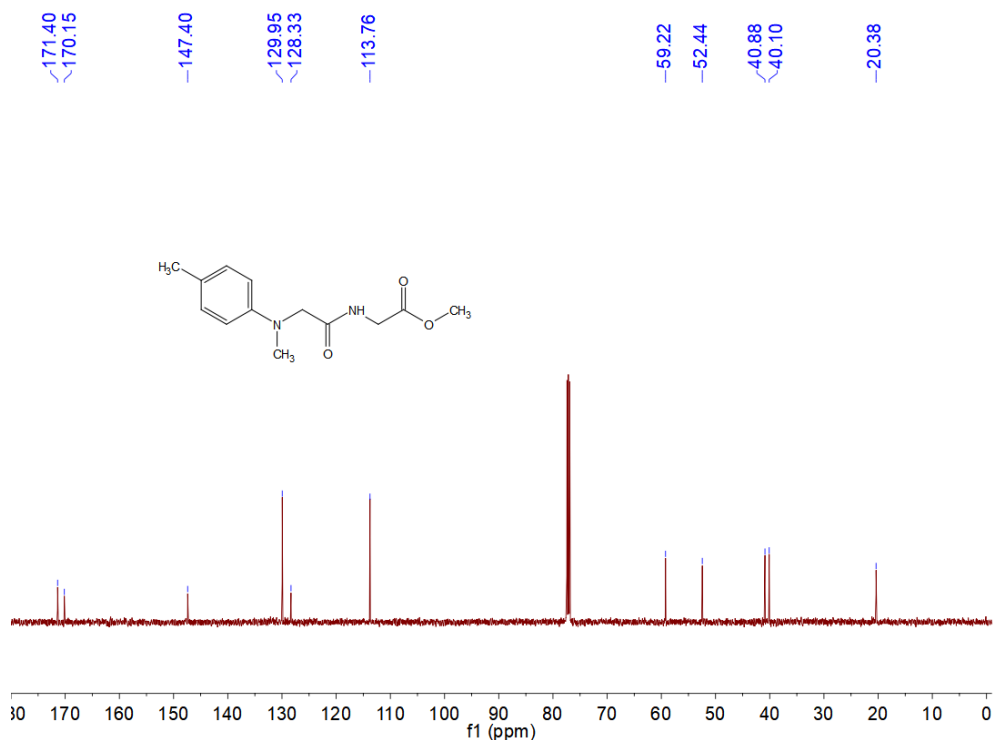

**Methyl N-methyl-N-(p-tolyl)glycylglycinate:**  $^1\text{H}$  NMR ( $\text{CDCl}_3$ , 400 MHz):  $\delta$  7.14 (s, 1H), 7.09-7.07(d,  $J = 8.0$  Hz, 2H), 7.70-6.68(d,  $J = 8.0$  Hz, 2H), 4.07-4.06 (d,  $J = 4.0$  Hz, 2H), 3.85 (s, 2H), 3.73 (s, 3H), 3.00 (s, 3H), 2.26 (s, 3H).  $^{13}\text{C}$  NMR ( $\text{CDCl}_3$ , 100 MHz):  $\delta$  171.4, 170.1, 147.4, 129.9, 128.3, 113.8, 59.2, 52.4, 40.9, 40.1, 20.4.

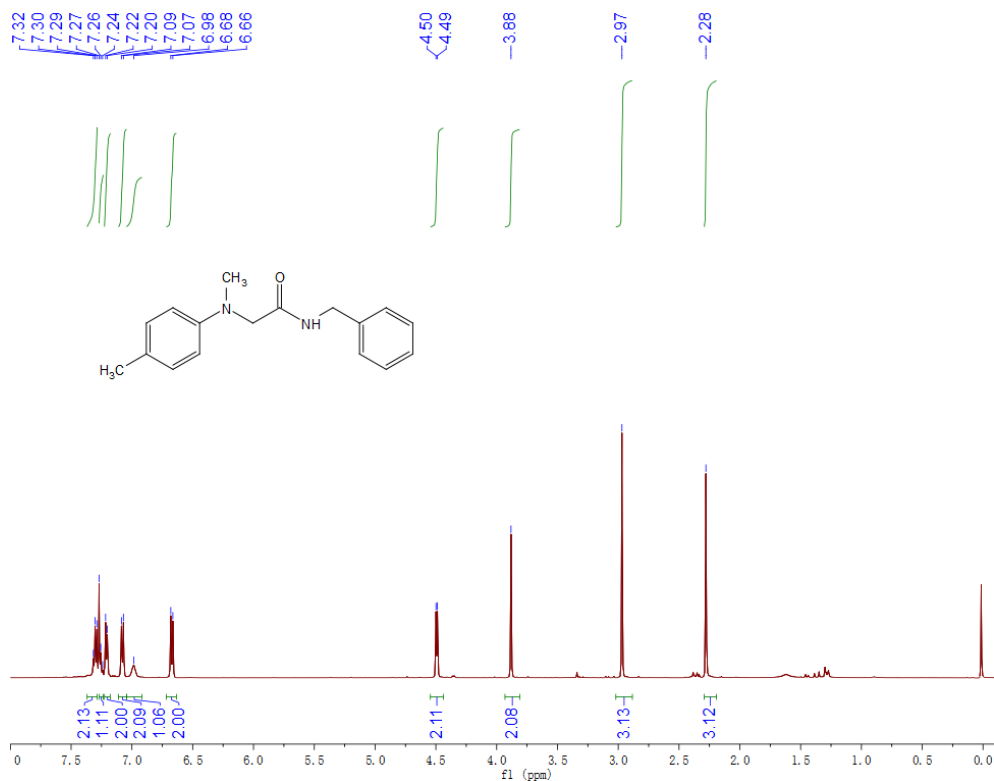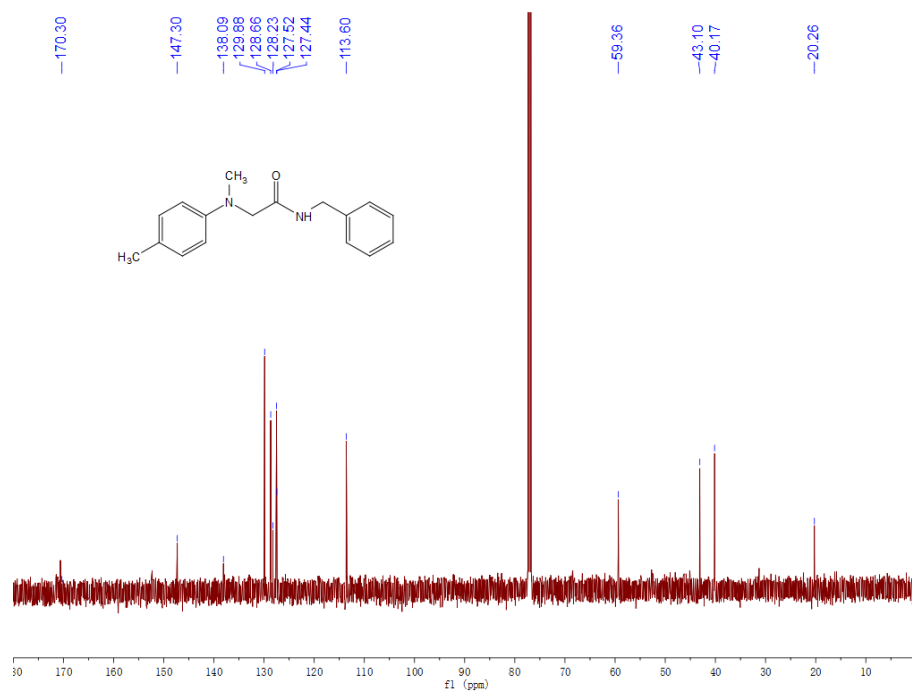

**N-benzyl-2-(methyl(p-tolyl)amino)acetamide:**  $^1\text{H}$  NMR ( $\text{CDCl}_3$ , 400 MHz):  $\delta$  7.32-7.24 (m, 3H), 7.21 (d,  $J = 8.0$  Hz, 2H), 7.08 (m,  $J$

= 8.0 Hz, 2H), 6.98 (s, 1H), 6.67(d,  $J = 8.0$  Hz, 2H), 4.50 (d, 2H), 3.88 (s, 2H), 2.97 (s, 3H), 2.28 (s, 3H)ppm.  $^{13}\text{C}$  NMR ( $\text{CDCl}_3$ , 100 MHz):  $\delta$  169.2, 166.3, 142.9., 137.1, 131.2, 130.8, 127.4, 127.2, 126.9, 99.9, 61.7, 42.6, 21.1, 14.1.

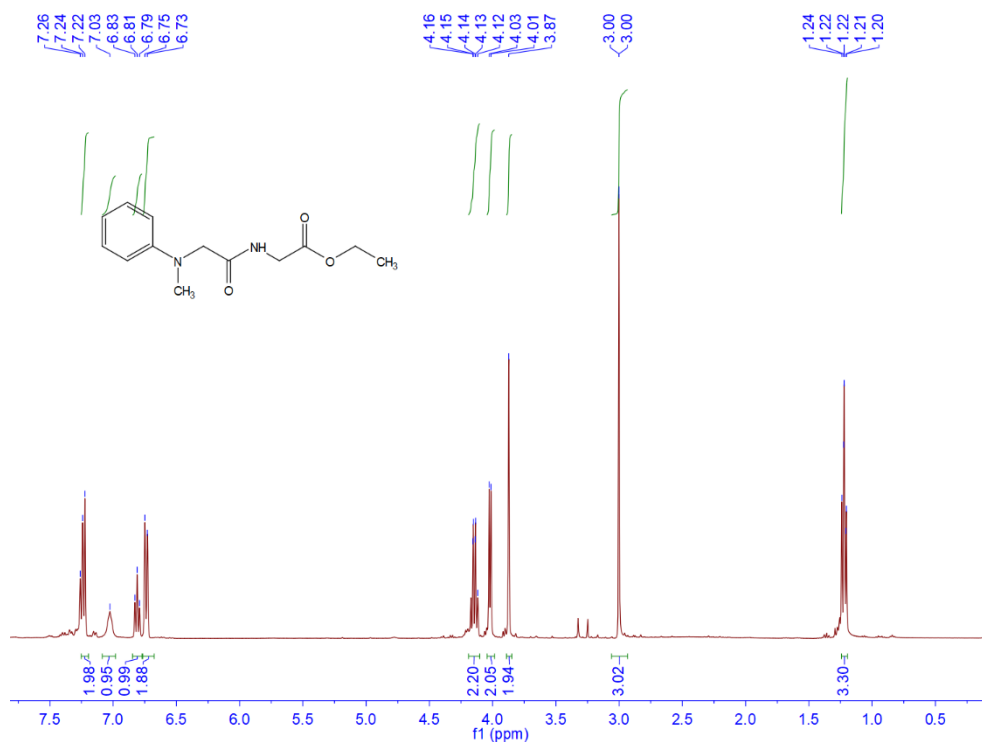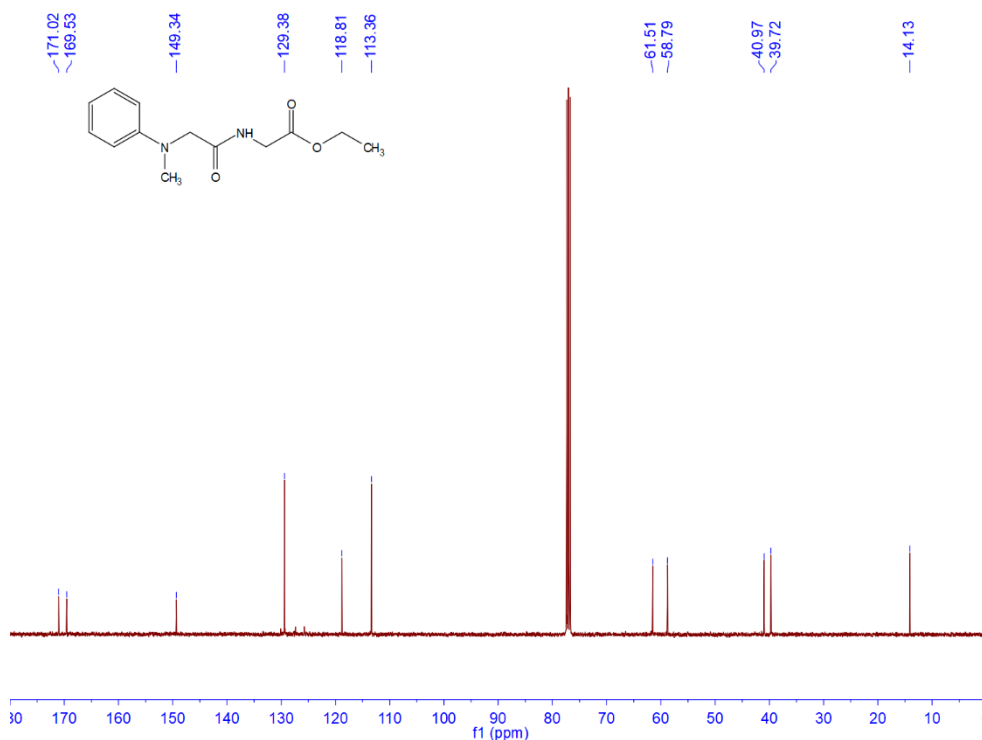

**Ethyl *N*-methyl-*N*-phenylglycylglycinate:**  $^1\text{H}$  NMR ( $\text{CDCl}_3$ , 400 MHz):  $\delta$  7.24-7.22 (d,  $J = 8.0$  Hz, 2H), 7.03 (s, 1H), 6.83-6.79 (t,  $J = 8.0$  Hz, 1H), 6.70-6.73(d,  $J = 8.0$  Hz, 2H), 4.16-4.12 (m, 2H),

4.03-4.01(d,  $J = 8.0$  Hz, 2H), 3.87 (s, 2H), 3.0 (s, 3H), 1.24-1.20 (t,  $J = 8.0$  Hz, 3H).  $^{13}\text{C}$  NMR ( $\text{CDCl}_3$ , 100 MHz):  $\delta$  171.0, 169.5, 149.3, 129.4, 118.8, 113.4, 61.5, 58.8, 41.0, 39.7, 14.1.

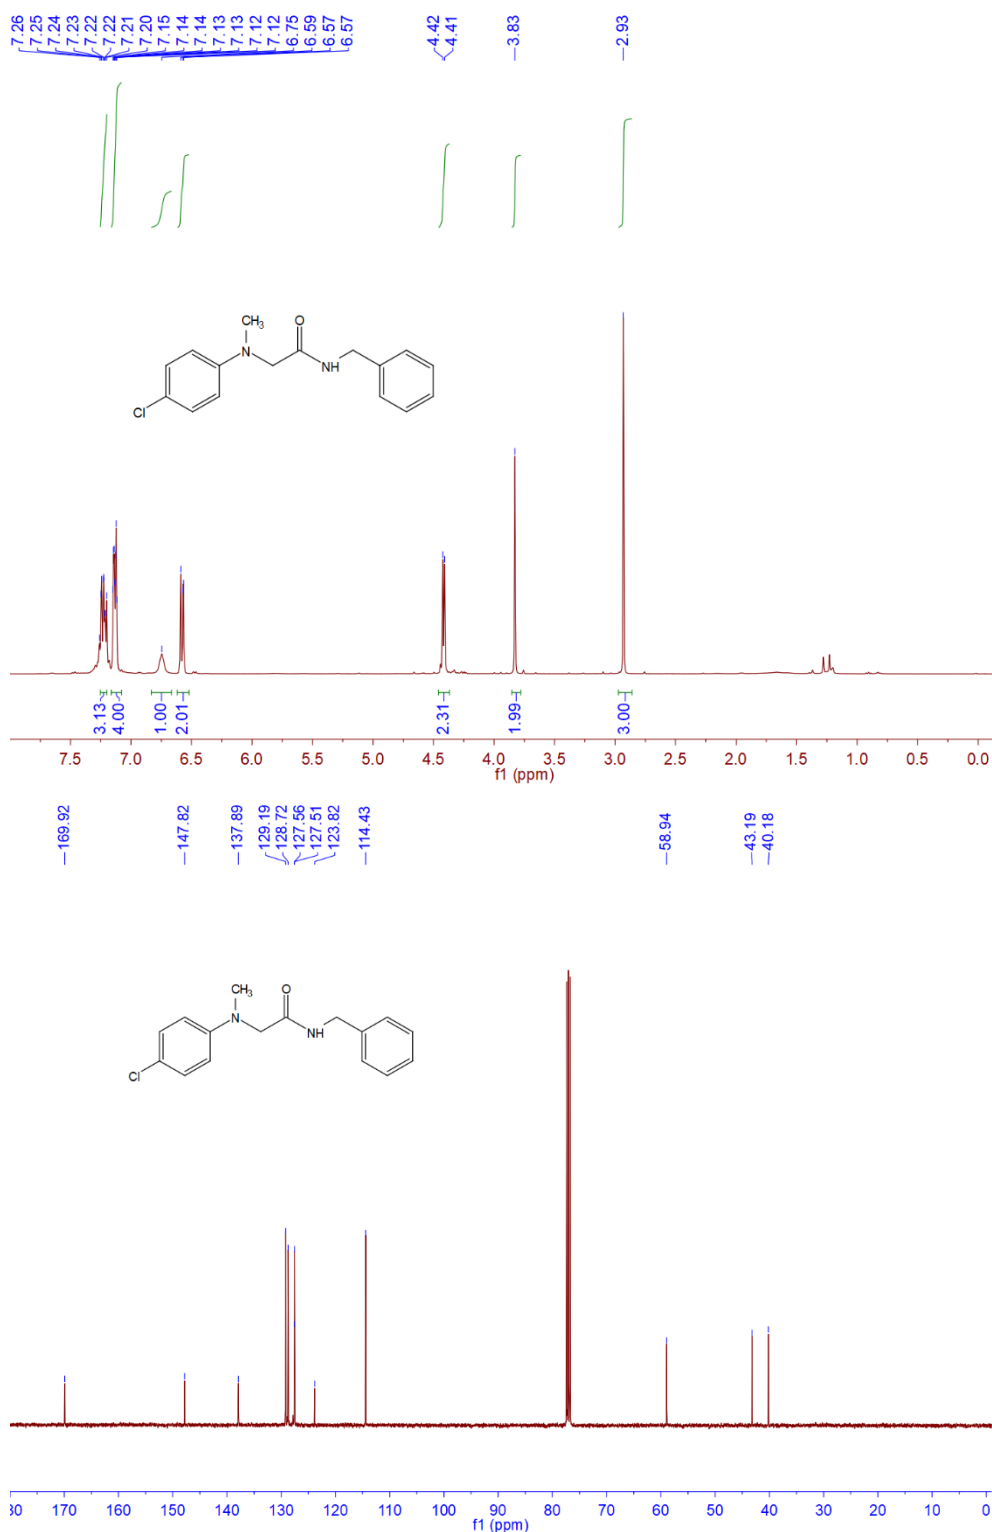

***N*-benzyl-2-((4-chlorophenyl)(methyl)amino)acetamide:**  $^1\text{H}$  NMR ( $\text{CDCl}_3$ , 400 MHz):  $\delta$  7.25-7.20 (m, 3H), 7.15-7.12 (m, 2H), 6.75 (s, 1H), 6.59-6.57 (d,  $J = 8.0$  Hz, 2H), 4.42-4.41 (d,  $J = 4.0$  Hz, 2H), 3.83 (s, 2H), 2.93 (s, 3H), 2.28 (s, 3H) ppm.  $^{13}\text{C}$  NMR ( $\text{CDCl}_3$ ,

100 MHz):  $\delta$  169.9, 147.8, 137.9, 129.2, 128.7, 127.6, 127.5, 123.8, 114.4, 58.9, 42.2, 40.2.

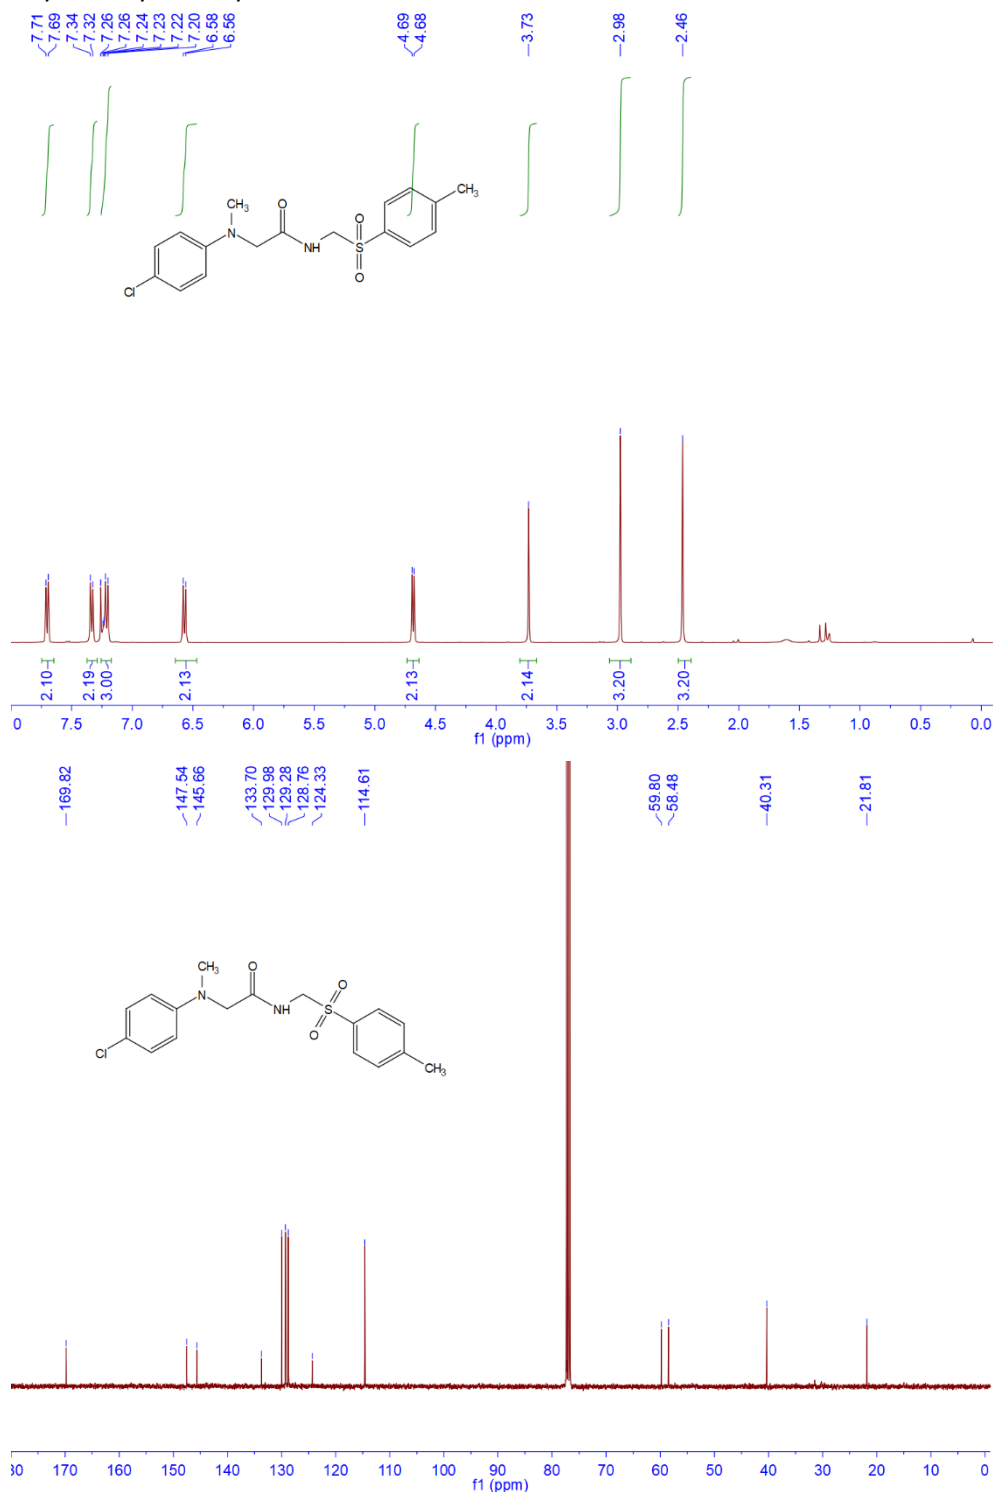

**2-((4-chlorophenyl)(methyl)amino)-N-(tosylmethyl)acetamide:**  $^1\text{H}$  NMR ( $\text{CDCl}_3$ , 400 MHz):  $\delta$  7.71-7.69 (d,  $J = 8.0$  Hz, 2H), 7.34-7.32 (d,  $J = 8.0$  Hz, 2H), 7.24-7.20 (m, 3H), 6.58-6.56 ((d,  $J = 8.0$  Hz, 2H), 6.59-6.57 (d,  $J = 4.0$  Hz, 2H), 4.69-4.68B(d,  $J = 4.0$  Hz, 2H), 2.98 (s, 3H), 2.46 (s, 3H) ppm.  $^{13}\text{C}$  NMR ( $\text{CDCl}_3$ , 100 MHz):  $\delta$  169.8, 147.5, 145.7, 133.7, 130.0, 129.3,

128.8, 124.3, 114.6, 59.8, 58.5, 40.3, 21.8.

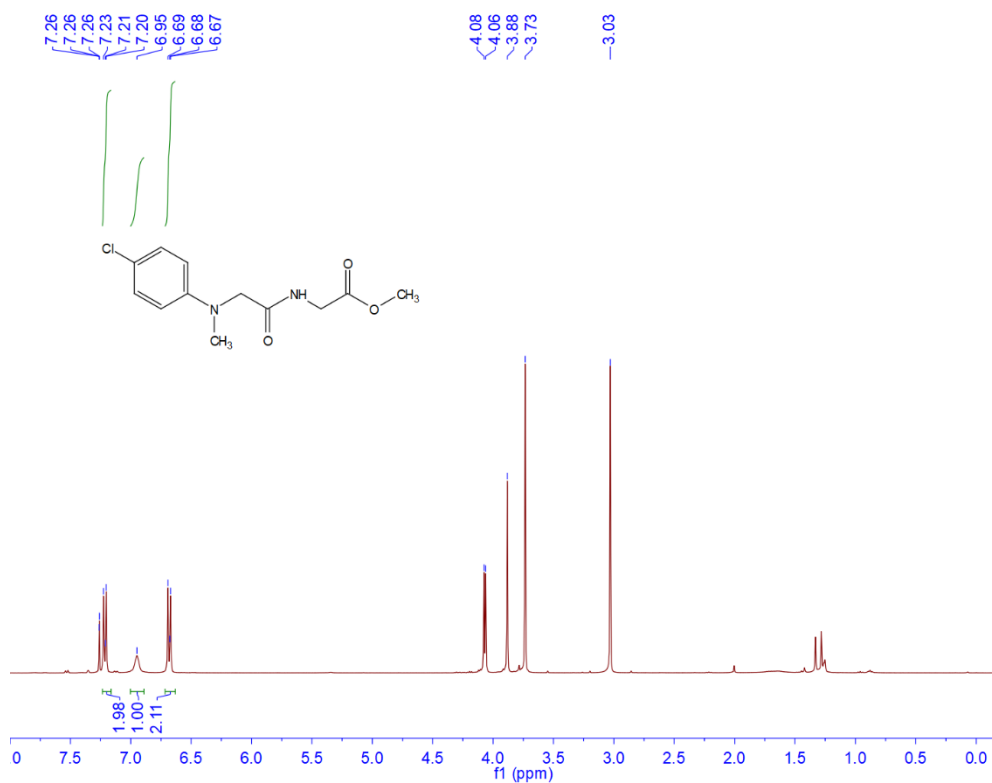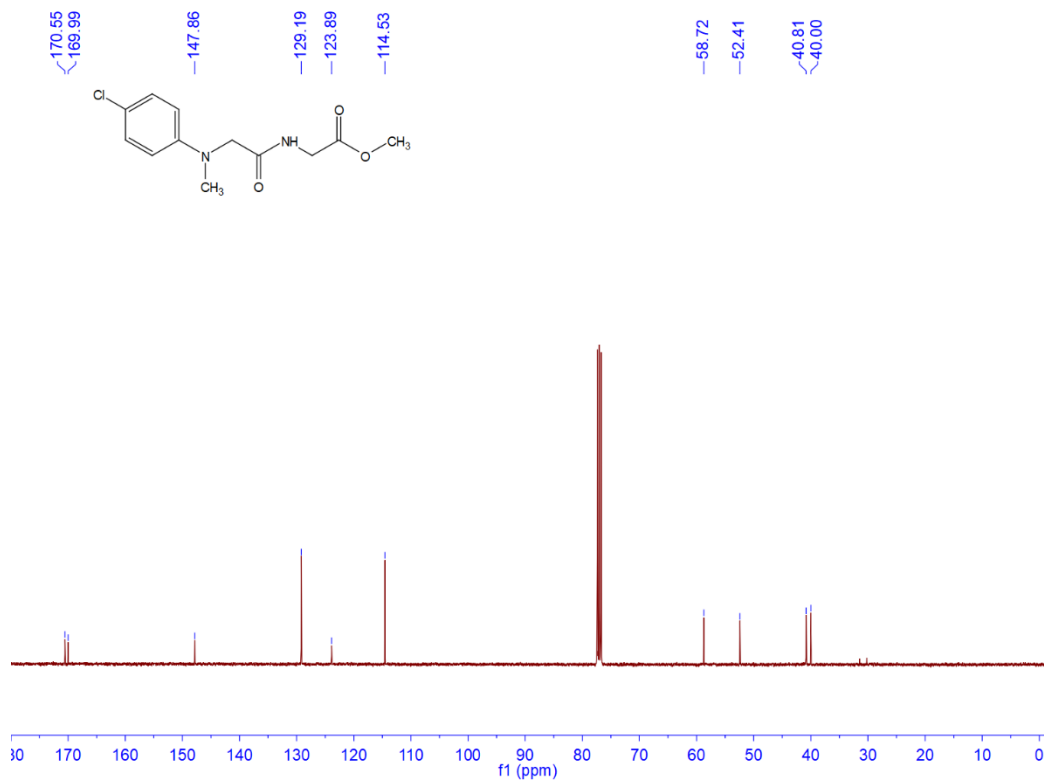

**Methyl N-(4-chlorophenyl)-N-methylglycylglycinate:** <sup>1</sup>H NMR (CDCl<sub>3</sub>, 400 MHz): δ 7.23-7.20 (d, J = 8.0 Hz, 2H), 6.95 (s, 1H),

6.69-6.67 (d,  $J = 8.0$  Hz, 2H), 4.08-4.06 (d,  $J = 8.0$  Hz, 2H), 3.87 (s, 2H), 3.73 (s, 3H), 3.03 (s, 3H).  $^{13}\text{C}$  NMR ( $\text{CDCl}_3$ , 100 MHz):  $\delta$  170.6, 170.0, 147.9, 129.2, 123.9, 114.5, 58.7, 52.4, 40.8, 40.0.

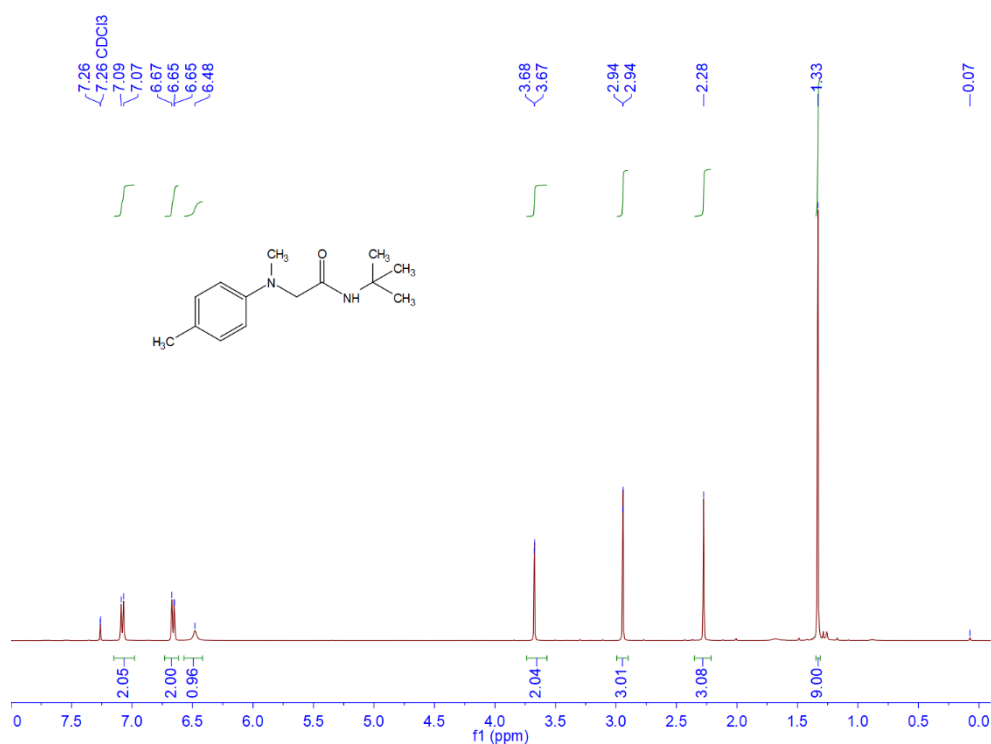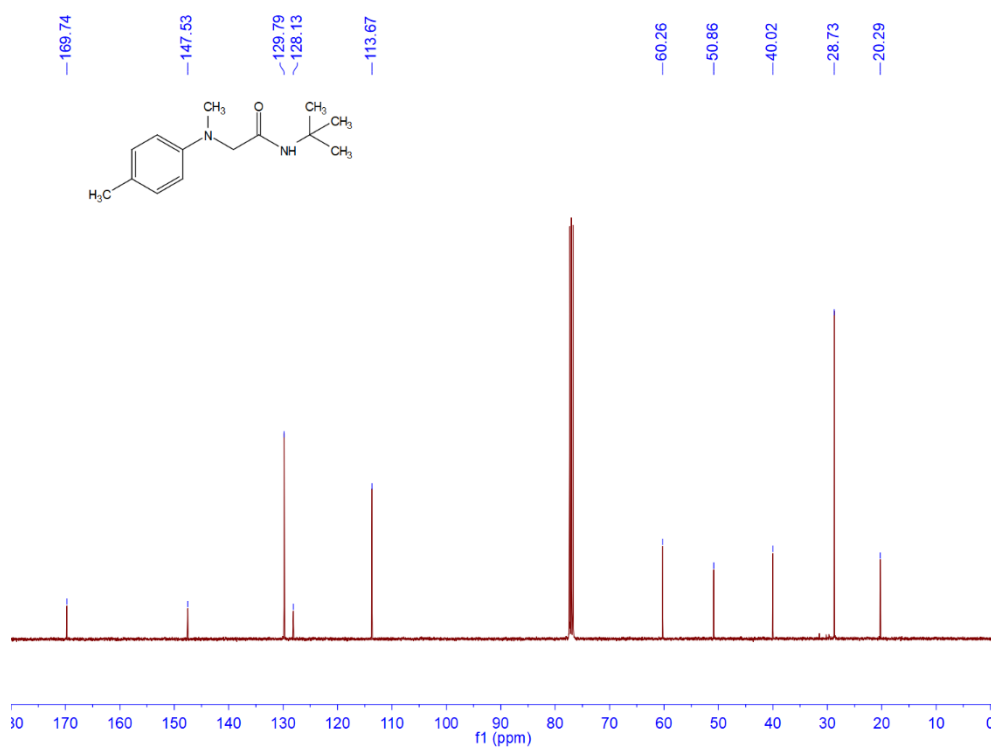

***N*-(*tert*-butyl)-2-(methyl(*p*-tolyl)amino)acetamide:**  $^1\text{H}$  NMR ( $\text{CDCl}_3$ , 400 MHz):  $\delta$  7.09-7.07 (d,  $J = 8.0$  Hz, 2H), 6.67-6.65 (d,  $J = 8.0$  Hz, 2H), 6.48 (s, 1H), 3.68 (s, 2H), 2.94 (s, 2H), 2.28 (s, 3H),



1.33 (s, 9H). <sup>13</sup>C NMR (CDCl<sub>3</sub>, 100 MHz): δ 169.7, 147.4, 147.5, 129.8, 128.1, 113.7, 60.3, 50.9, 40.0, 28.7, 20.3.

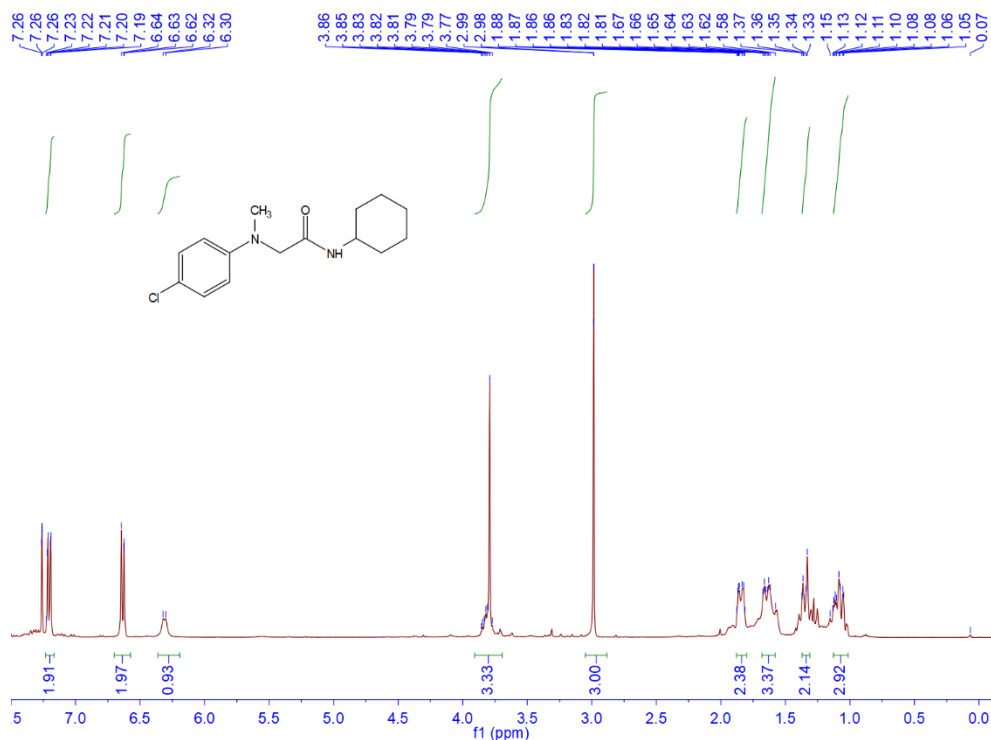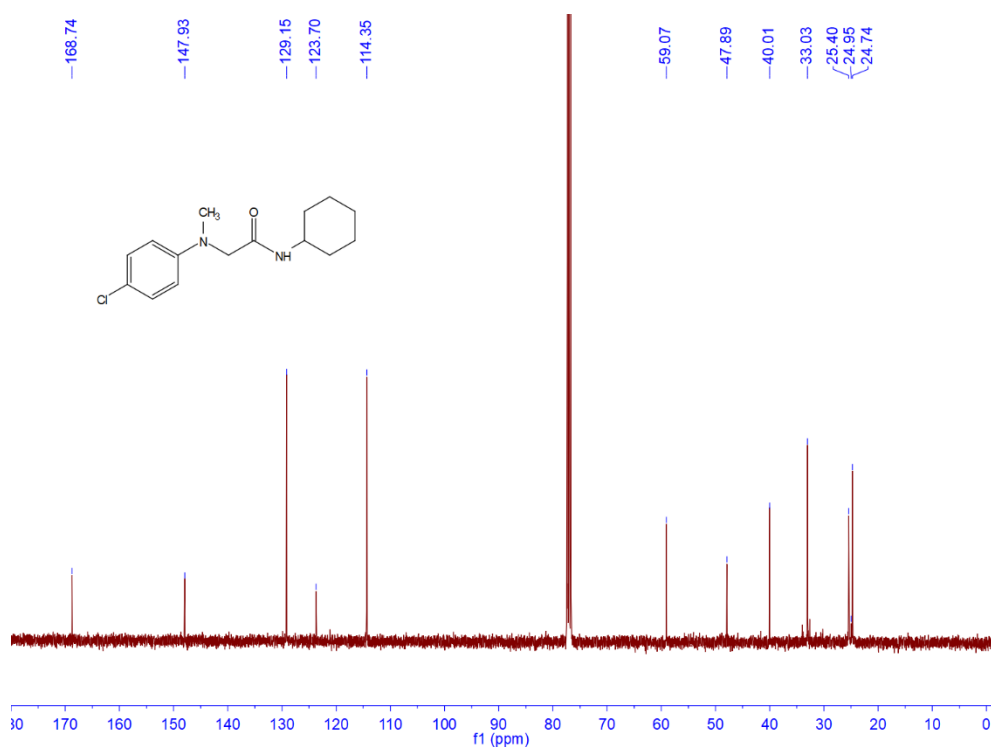

**2-((4-chlorophenyl)(methyl)amino)-N-cyclohexylacetamide:**

<sup>1</sup>H NMR (CDCl<sub>3</sub>, 400 MHz): δ 7.23-7.21 (d, *J* = 8.0 Hz, 2H), 7.21-7.19 (d, *J* = 8.0 Hz, 2H), 3.86 (m+s, 3H), 2.98 (s, 3H), 1.88-1.81 (m, 2H), 1.67-1.58 (m, 3H), 1.37-1.33 (m, 2H), 1.15-1.05 (m, 3H)

<sup>13</sup>C NMR (CDCl<sub>3</sub>, 100 MHz): δ 168.7, 147.9, 129.1, 123.7, 114.3, 59.0, 47.9, 40.0, 33.0, 25.4, 25.0, 24.7.

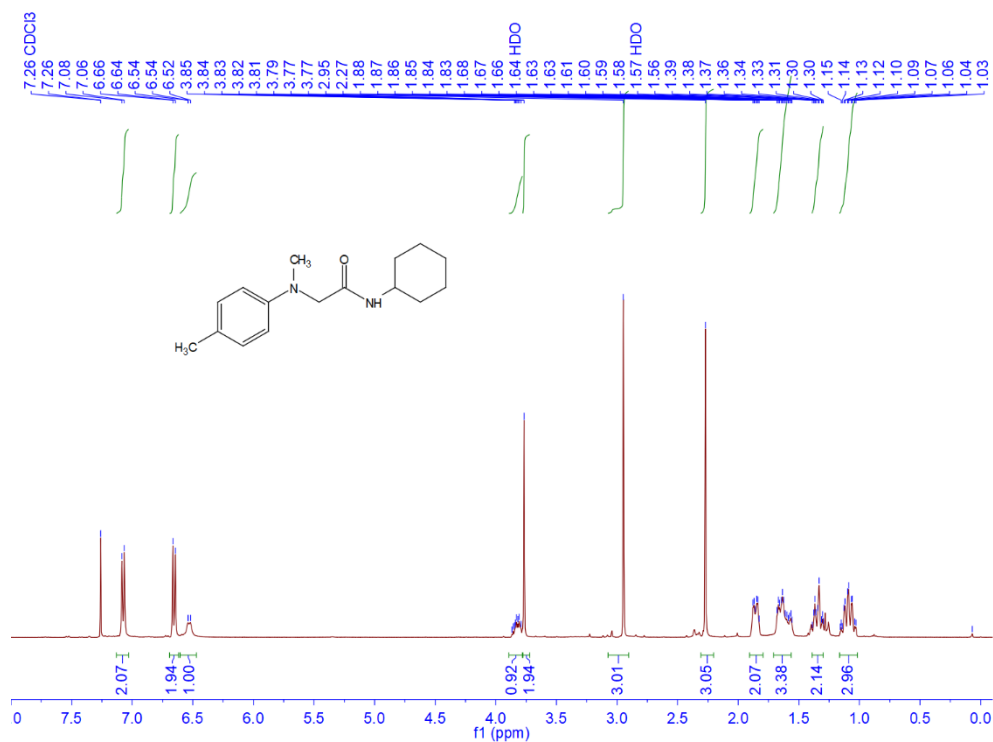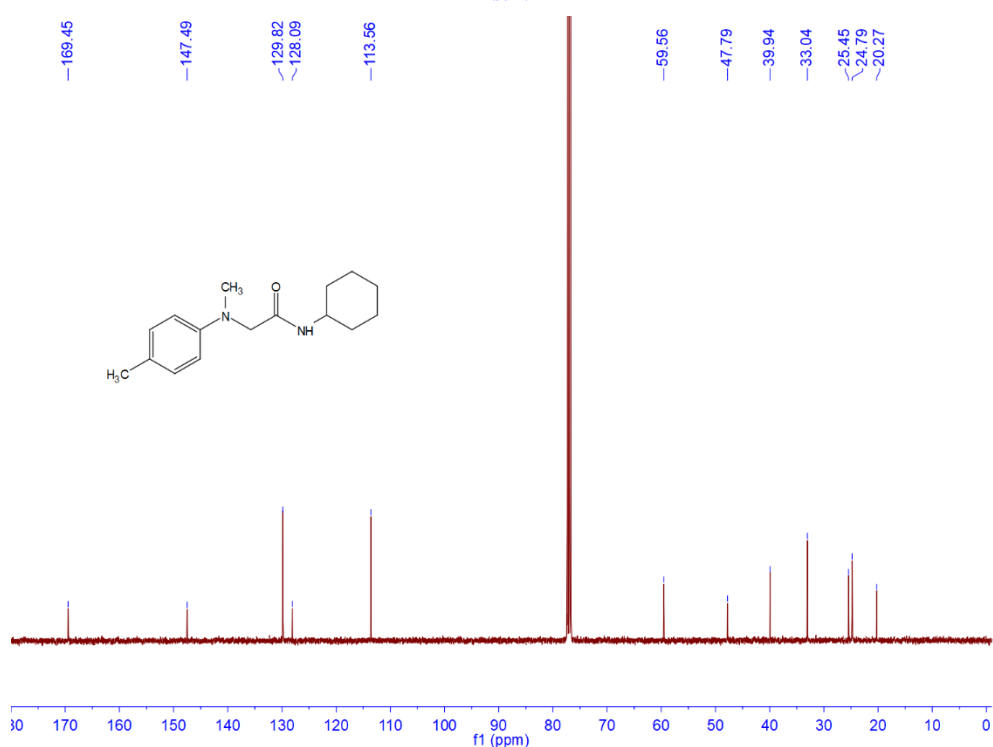

***N*-cyclohexyl-2-(methyl(*p*-tolyl)amino)acetamide:** <sup>1</sup>H NMR (CDCl<sub>3</sub>, 400 MHz): δ 7.08-7.06 (d, *J* = 8.0 Hz, 2H), 6.66-6.64 (d, *J* = 8.0 Hz, 2H), 6.54 (s, 1H), 3.87-3.79 (m, 1H), 3.77 (s, 2H), 2.95 (s, 3H), 2.27 (s, 3H). 1.88-1.83 (m, 2H), 1.68-1.56 (m, 3H), 1.39-1.30 (m, 2H), 1.16-1.03 (m, 3H) <sup>13</sup>C NMR (CDCl<sub>3</sub>, 100 MHz): δ 169.5, 147.5, 129.8, 128.1, 113.5, 59.5, 47.8, 39.9, 33.0, 25.4, 24.8, 20.3.

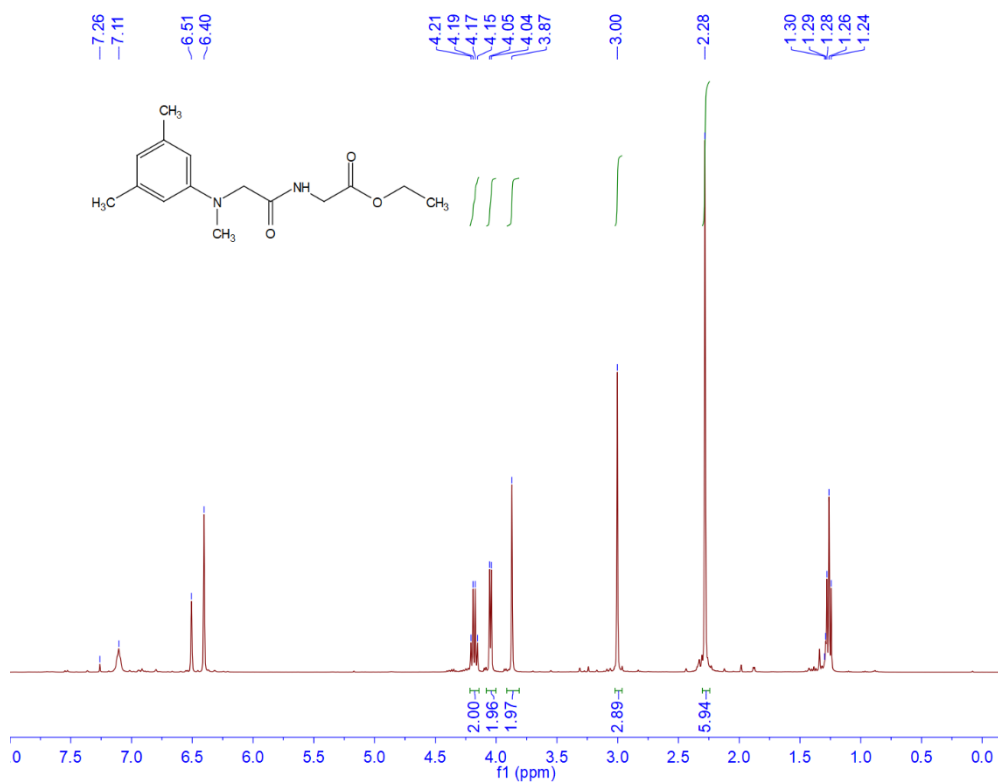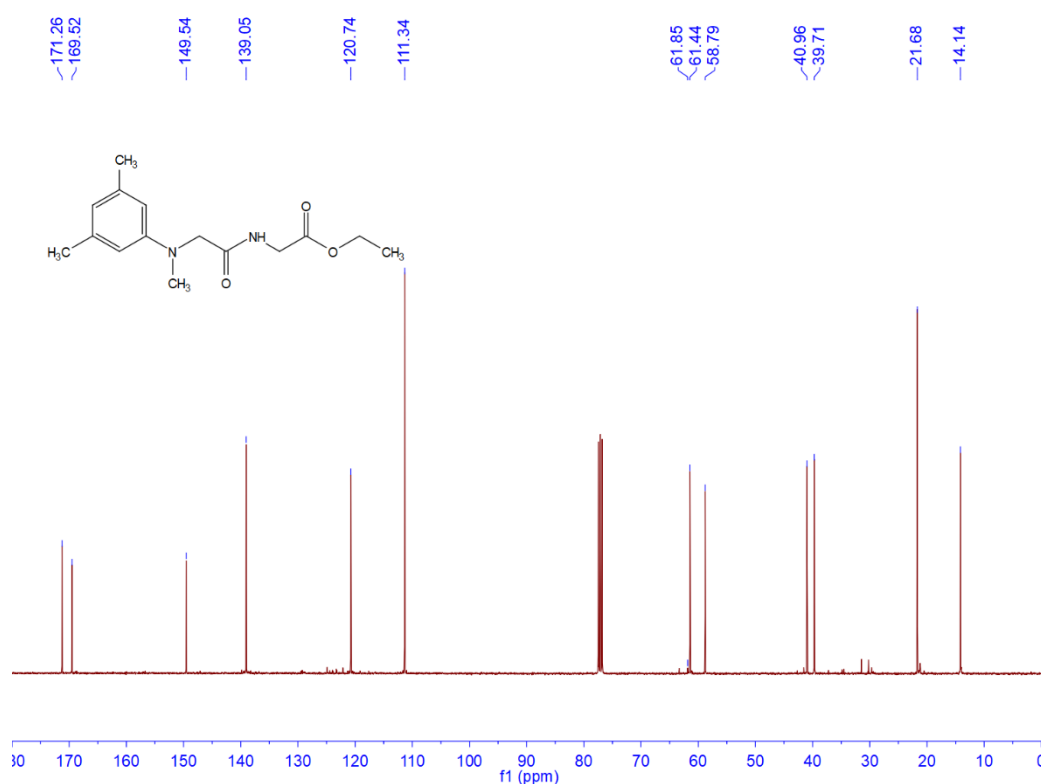

**Ethyl N-(3,5-dimethylphenyl)-N-methylglycylglycinate:** <sup>1</sup>H NMR (CDCl<sub>3</sub>, 400 MHz): δ 7.11 (s, 1H), 6.51 (s, 3H), 6.40 (s, 6H), 4.21-4.15 (dd, J = 8.0 Hz, 2H), 4.05-4.04 (d, J = 8.0 Hz, 2H), 3.87 (s, 2H), 3.00 (s, 3H), 2.28 (s, 6H) <sup>13</sup>C NMR (CDCl<sub>3</sub>, 100 MHz): δ 171.3, 169.5, 149.5, 139.0, 120.7, 111.3, 61.4, 58.8, 41.0, 39.7, 21.7, 14.1.

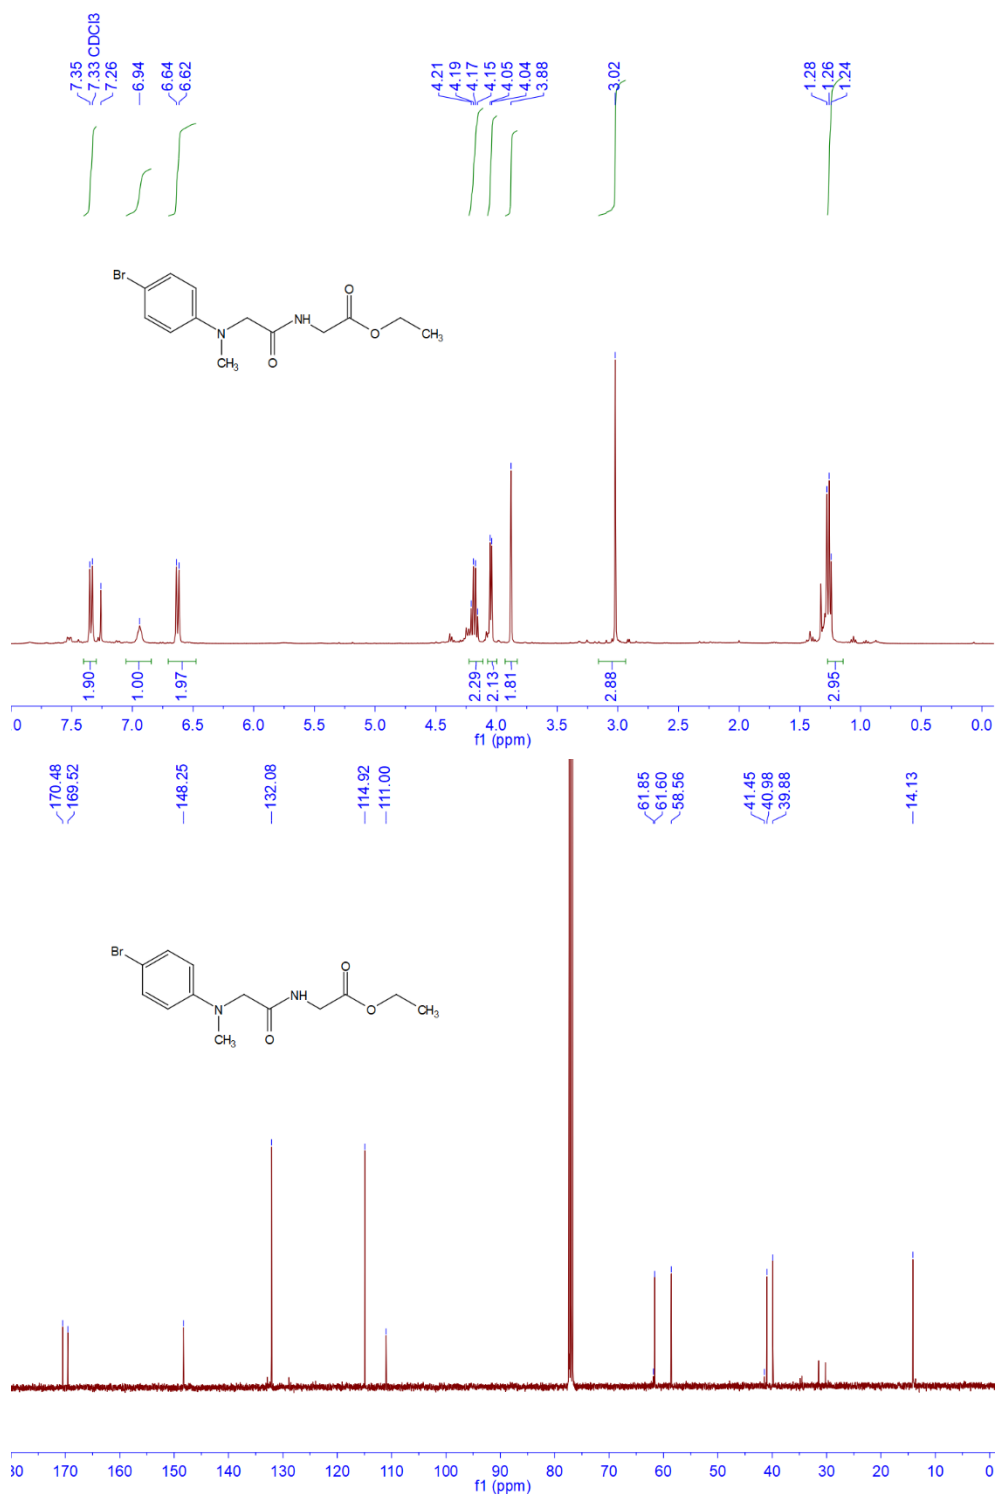

**Ethyl N-(4-bromophenyl)-N-methylglycylglycinate:** <sup>1</sup>H NMR (CDCl<sub>3</sub>, 400 MHz): δ 7.55-7.33 (d, J = 8.0 Hz, 2H), 6.94 (s, 1H), 6.64-6.62 (d, J = 8.0 Hz, 2H), 4.21-4.15 (q, J = 8.0 Hz, 1H), 4.05-4.04 (d, J = 8.0 Hz, 2H), 3.88 (s, 2H), 2.95 (s, 3H), 3.02 (s, 3H), 1.28-1.24 (t, J = 8.0 Hz, 3H) <sup>13</sup>C NMR (CDCl<sub>3</sub>, 100 MHz): δ 170.4, 169.5, 148.2, 132.0, 114.9, 111.0, 61.8, 61.6, 58.6, 41.4, 41.0, 39.9, 14.1.

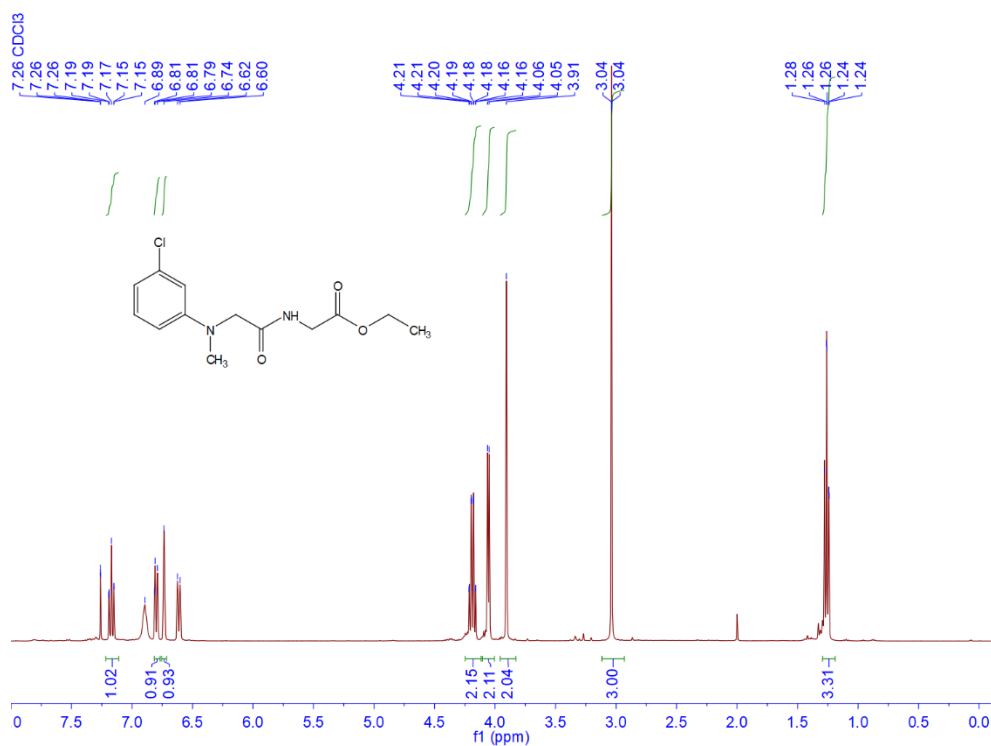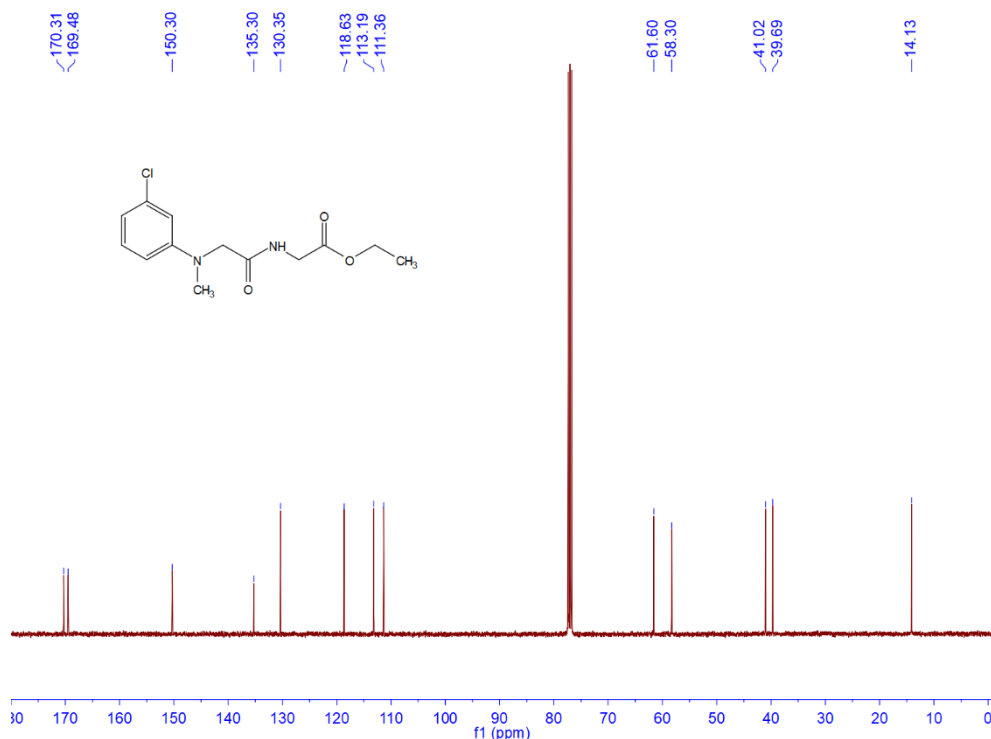

**Ethyl N-(3-chlorophenyl)-N-methylglycylglycinate:** <sup>1</sup>H NMR (CDCl<sub>3</sub>, 400 MHz): δ 7.19-7.15 (m, 1H), 6.89 (s, 1H), 6.81-6.79 (d, *J* = 8.0 Hz, 2H), 6.74 (s, 1H), 6.62-6.60 (d, *J* = 8.0 Hz, 2H), 4.21-4.16 (d, *J* = 8.0 Hz, 2H), 4.06-4.05 (d, *J* = 4.0 Hz, 2H), 3.91 (s, 2H), 1.28-1.24 (t, *J* = 8.0 Hz, 3H). <sup>13</sup>C NMR (CDCl<sub>3</sub>, 100 MHz): δ 170.4,

169.5, 148.2, 132.0, 114.9, 111.0, 61.8, 61.6, 58.6, 41.4, 41.0, 39.9, 14.1.

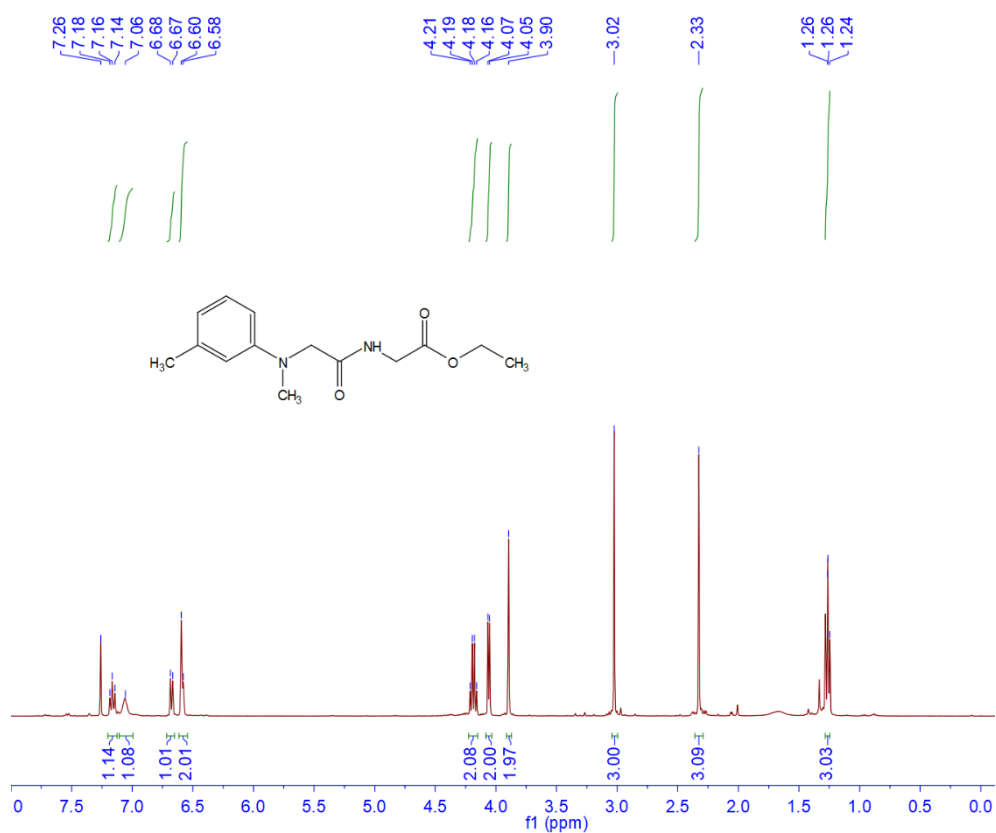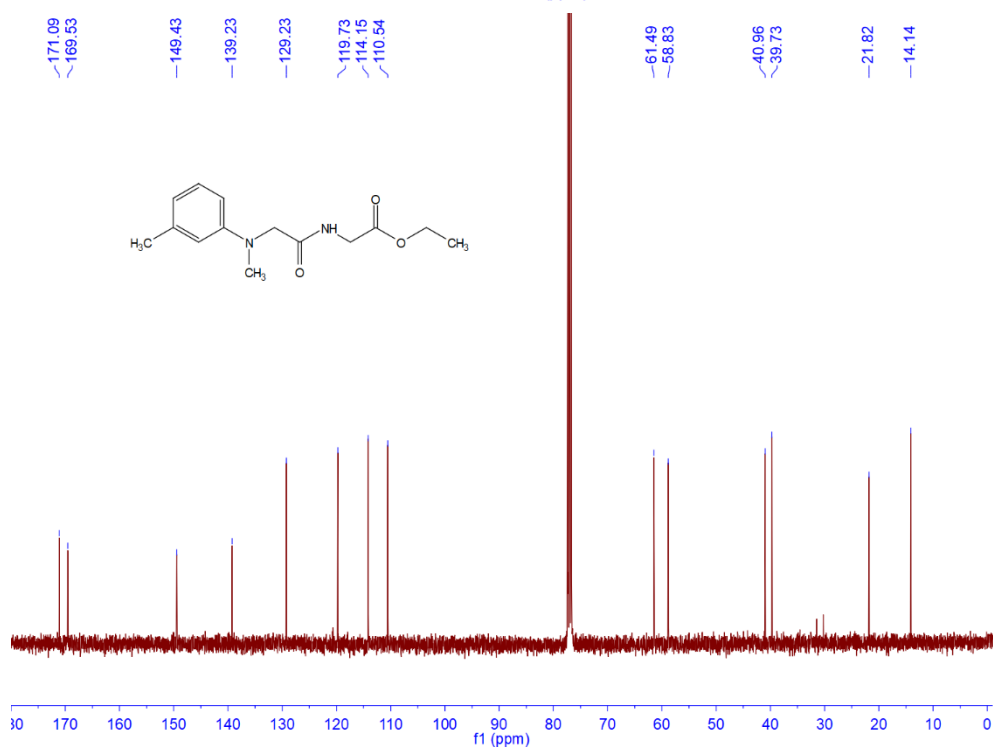

**Ethyl N-methyl-N-(m-tolyl)glycylglycinate:** <sup>1</sup>H NMR (CDCl<sub>3</sub>, 400 MHz): δ 7.18-7.14 (d, J = 8.0 Hz, 2H), 7.06 (s, 1H), 6.68-6.67 (d, J

= 8.0 Hz, 1H), 6.60-6.58 (d,  $J = 8.0$  Hz, 2H), 4.21-4.16 (d,  $J = 8.0$  Hz, 2H), 4.07-4.05 (d,  $J = 8.0$  Hz, 2H), 3.02 (s, 3H), 2.33 (s, 3H), 1.26-1.24 (t,  $J = 8.0$  Hz, 3H).  $^{13}\text{C}$  NMR ( $\text{CDCl}_3$ , 100 MHz):  $\delta$  171.1, 169.5, 149.4, 139.2, 129.2, 119.7, 114.1, 110.5, 61.5, 58.8, 40.9, 58.8, 40.9, 39.7, 21.8, 14.1.

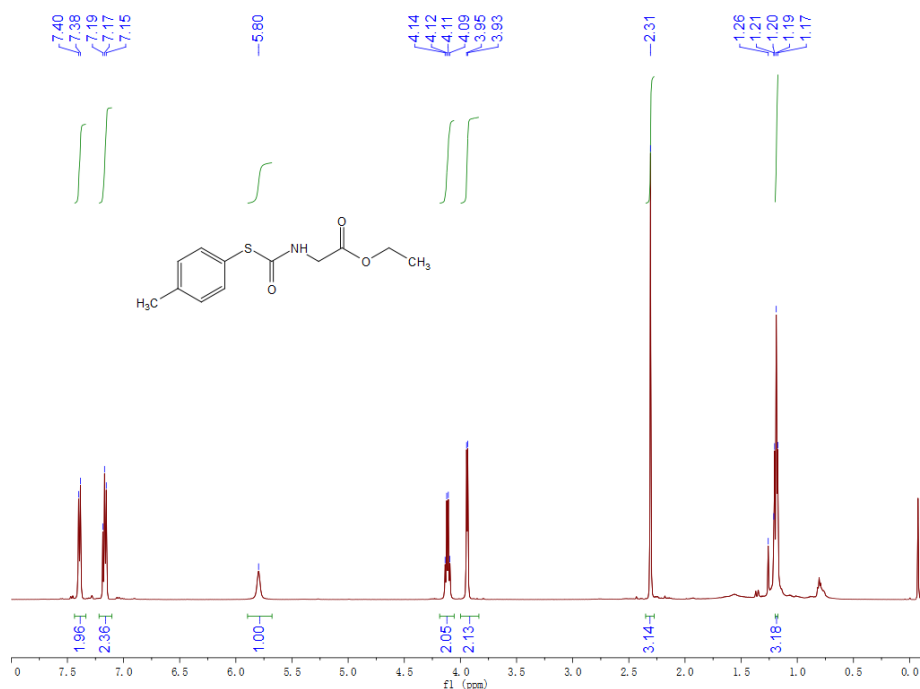

**Figure S16.**  $^1\text{H}$  NMR for ethyl 2-(p-tolylthiocarbonylamino)acetate  
Ethyl 2-(p-tolylthiocarbonylamino)acetate: Compound 4a was obtained in 78 % yield according to the general procedure.  $^1\text{H}$  NMR ( $\text{CDCl}_3$ , 400 MHz, ppm):  $\delta$  7.39 (d, 2H), 7.16 (d, 2H), 5.87 (s, 1H), 4.11 (q, 2H), 3.94 (d, 2H), 2.31 (s, 3H), 1.19 (t, 3H).

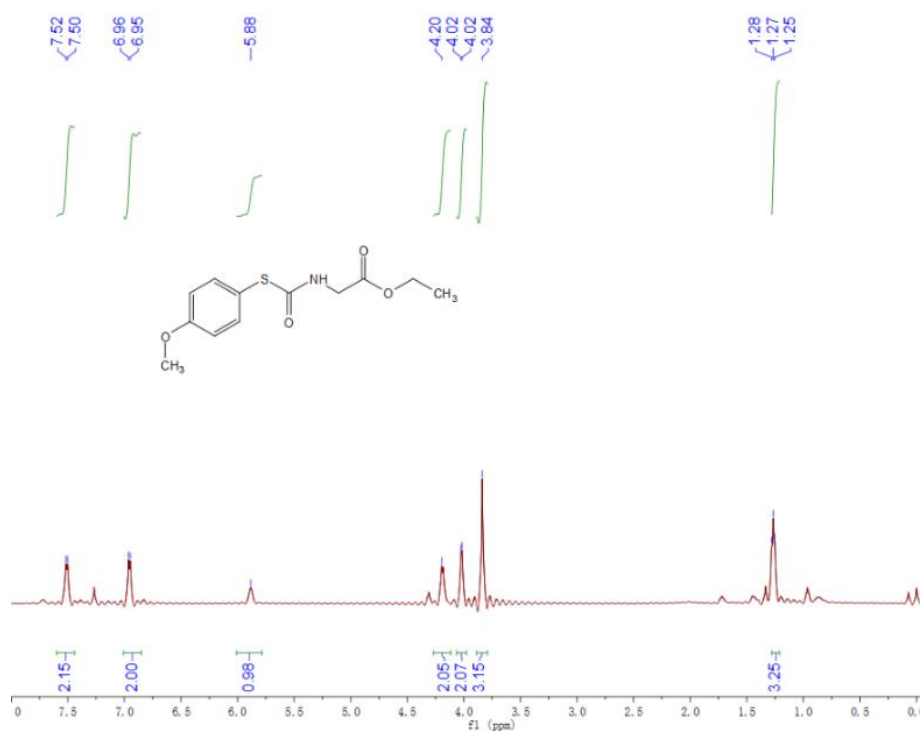

**Figure S17.** <sup>1</sup>H NMR for ethyl 2-((4-methoxyphenylthio)Carbonylamino)acetate

Ethyl 2-((4-methoxyphenylthio)carbonylamino)acetate: Compound 4b was obtained in 62 % yield according to the general procedure. white solid, <sup>1</sup>H NMR (CDCl<sub>3</sub>, 400 MHz, ppm): δ 7.50 (d, 2H), 6.95 (d, 2H), 5.88 (s, 1H), 4.20 (q, 2H), 4.02 (d, 2H), 3.84 (s, 3H), 1.27 (t, 3H).



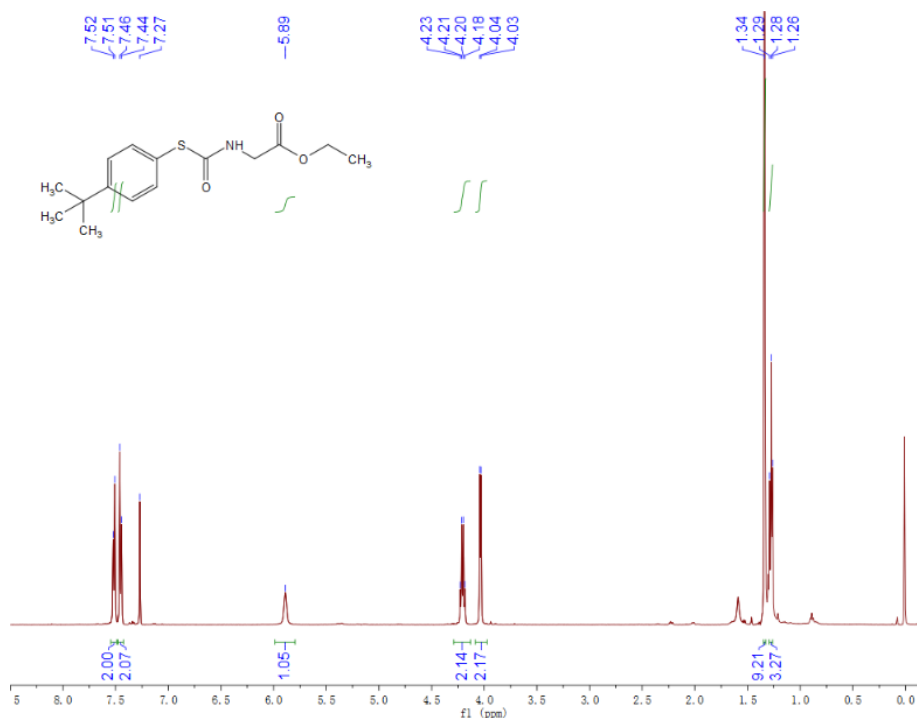

**Figure S18.**  $^1\text{H}$  NMR for ethyl ((4-(tert-butyl)phenyl)thio)carbonyl-glycinate

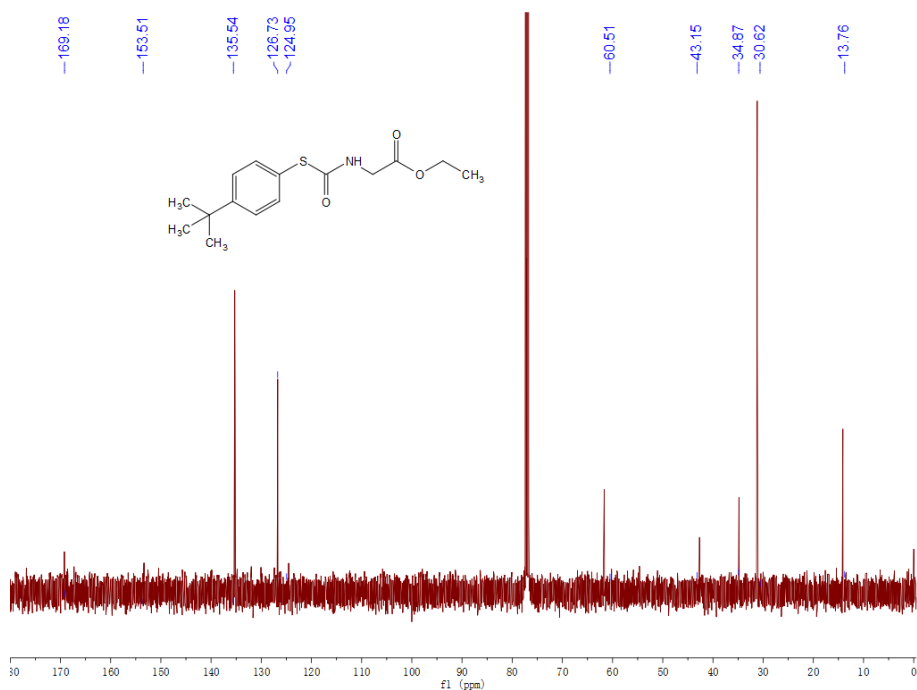

**Figure S19.**  $^{13}\text{C}$  NMR for ethyl ((4-(tert-butyl)phenyl)thio)carbonyl-glycinate

Ethyl ((4-(tert-butyl)phenyl)thio)carbonyl-glycinate: Compound 4c was obtained in 56 % yield according to the general procedure.  $^1\text{H}$

NMR (CDCl<sub>3</sub>, 400 MHz, ppm): δ 7.52-7.51 (d, 2H), 7.46-7.42 (d, 2H), 5.89 (s, 1H), 4.20 (q, 2H), 4.03 (d, 2H), 1.31 (s, 9H) 1.29-2.26 (t, 3H). <sup>13</sup>C NMR (CDCl<sub>3</sub>, 100 MHz, ppm): δ 169.1, 153.5, 135.5, 126.7, 124.9, 60.5, 43.1, 34.8, 30.6, 13.7.

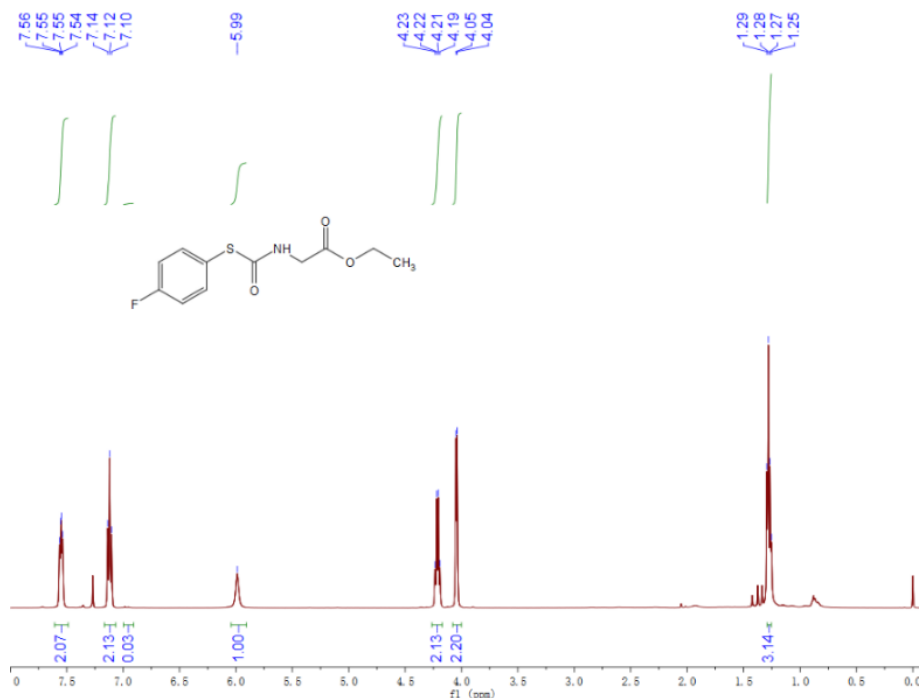

**Figure S20.** <sup>1</sup>H NMR for ethyl 2-((4-fluorophenylthio)carbonylamino)-acetate.

Ethyl 2-((4-fluorophenylthio)carbonylamino)acetate: Compound 4d was obtained in 77 % yield according to the general procedure. <sup>1</sup>H NMR (CDCl<sub>3</sub>, 400 MHz, ppm): δ 7.56-7.54 (m, 2H), 7.14-7.10 (m, 2H), 5.99 (s, 1H), 4.21 (q, 2H), 4.04 (d, 2H), 1.28 (t, 3H).

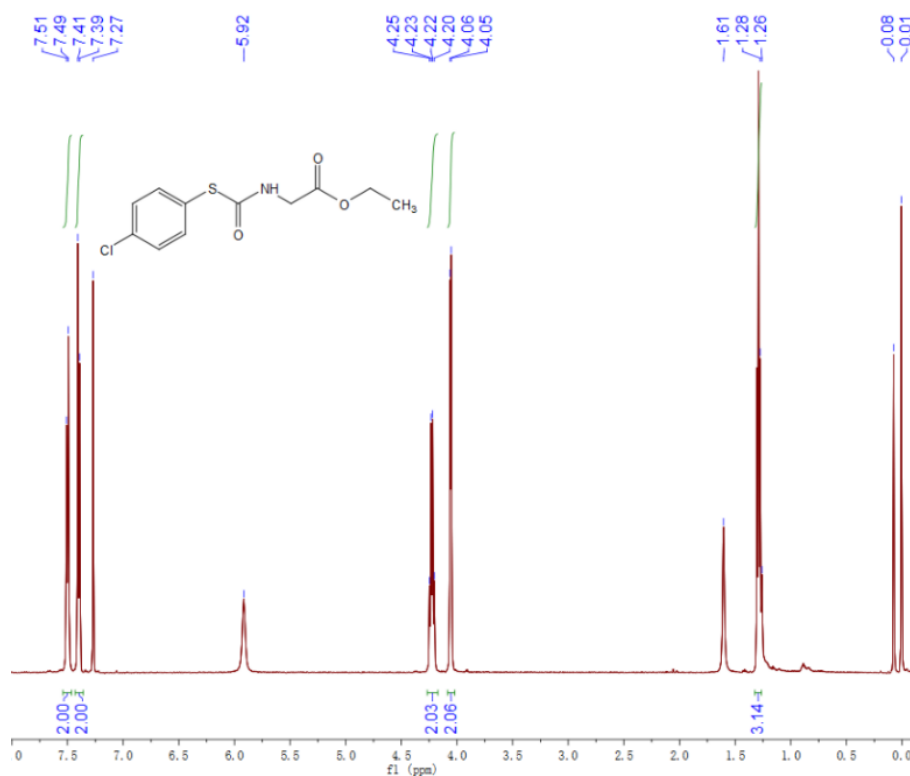

**Figure S21.** <sup>1</sup>H NMR for ethyl 2-((4-chlorophenylthio)carbonylamino)acetate

Ethyl 2-((4-chlorophenylthio)carbonylamino)acetate: Compound 4e was obtained in 92 % yield according to the general procedure. <sup>1</sup>H NMR (CDCl<sub>3</sub>, 400 MHz, ppm): δ 7.49 (d, 2H), 7.39 (d, 2H), 5.92 (s, 1H), 4.23 (q, 2H), 4.05 (d, 2H), 1.27 (t, 3H).

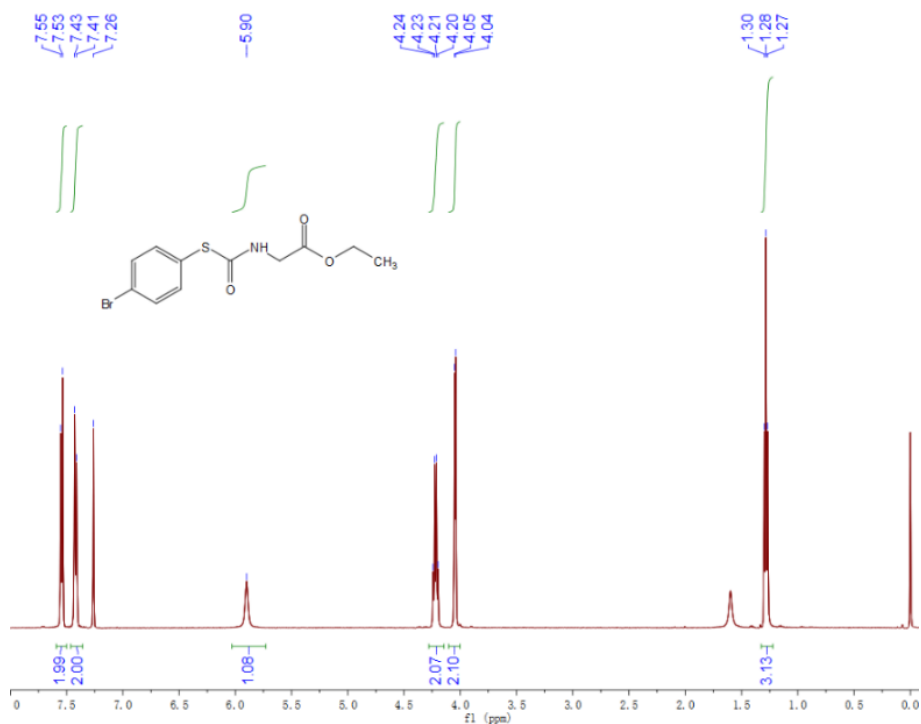

**Figure S22.** <sup>1</sup>H NMR for ethyl 2-((4-bromophenylthio)carbonylamino)acetate.

Ethyl 2-((4-bromophenylthio)carbonylamino)acetate: Compound 4f was obtained in 82 % yield according to the general procedure. <sup>1</sup>H NMR (CDCl<sub>3</sub>, 400 MHz, ppm): δ 7.54 (d, 2H), 7.41 (d, 2H), 5.90 (s, 1H), 4.23 (q, 2H), 4.04 (d, 2H), 1.28 (t, 3H).

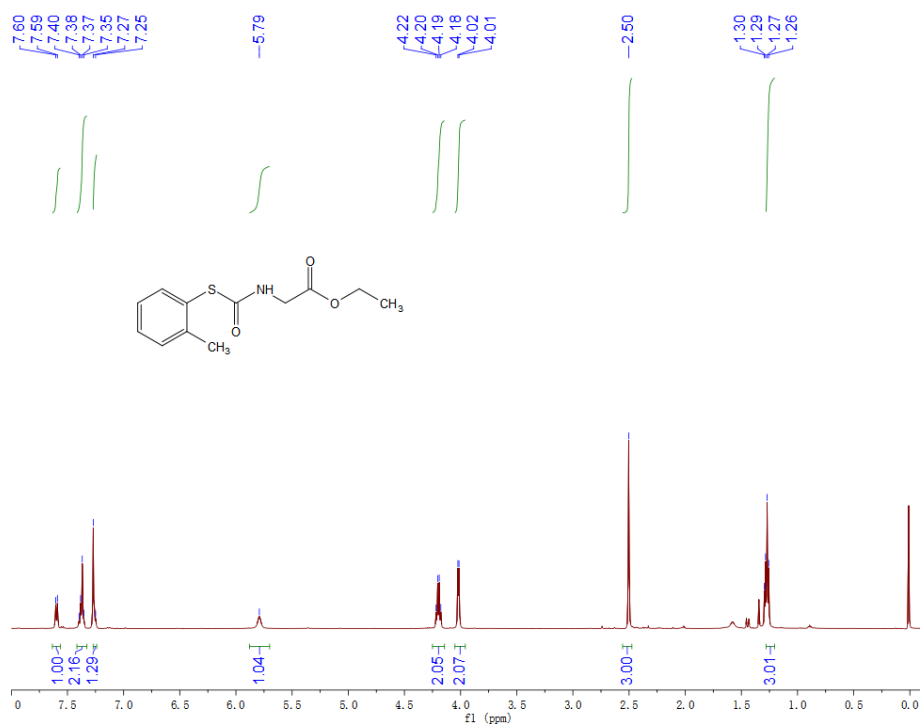

**Figure S23.** <sup>1</sup>H NMR for ethyl ((o-tolylthio)carbonyl)glycinate

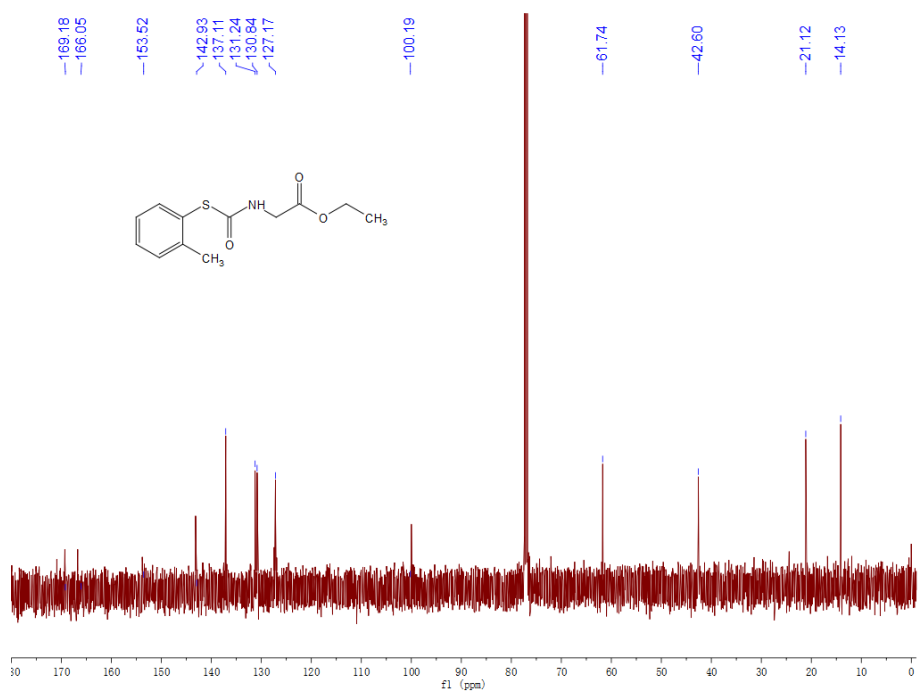

**Figure S24.** <sup>13</sup>C NMR for ethyl ((o-tolylthio)carbonyl)glycinate

Ethyl ((o-tolylthio)carbonyl)glycinate: Compound 4g was obtained in 56 % yield according to the general procedure. <sup>1</sup>H NMR (CDCl<sub>3</sub>, 400 MHz, ppm): δ 7.60(d, 1H), 7.40-7.35 (m, 2H), 7.27-2.25(m, 1H), 5.79 (s, 1H), 4.20 (q, 2H), 4.02 (d, 2H), 2.50 (s, 3H) 1.30-1.26 (t,

3H).  $^{13}\text{C}$  NMR ( $\text{CDCl}_3$ , 125 MHz, ppm):  $\delta$  170.3, 147.3, 138.1, 129.9, 128.7, 128.2, 127.5, 127.4, 113.6, 59.4, 43.1, 40.17, 20.3

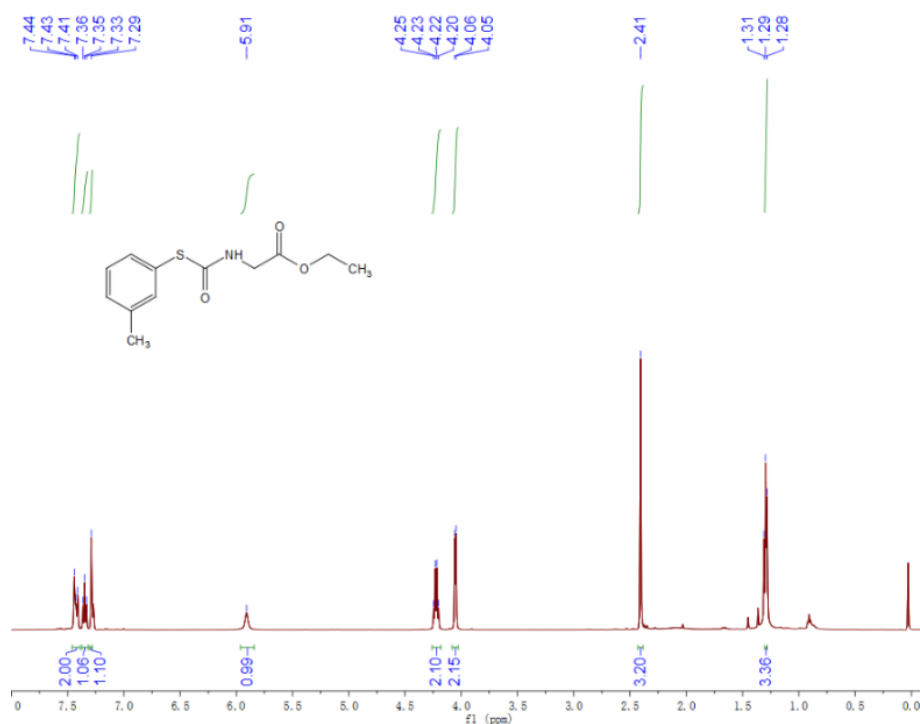

**Figure S25.**  $^1\text{H}$  NMR for ethyl 2-(m-tolylthiocarbonylamino)acetate  
Ethyl 2-(m-tolylthiocarbonylamino)acetate: Compound 4h was obtained in 74 % yield according to the general procedure.  $^1\text{H}$  NMR ( $\text{CDCl}_3$ , 500 MHz, ppm):  $\delta$  7.44-7.41 (m, 2H), 7.35 (t, 1H), 7.29 (s, 1H), 5.91 (s, 1H), 4.23 (q, 2H), 4.05 (d, 2H), 2.41 (s, 3H), 1.29 (t, 3H);

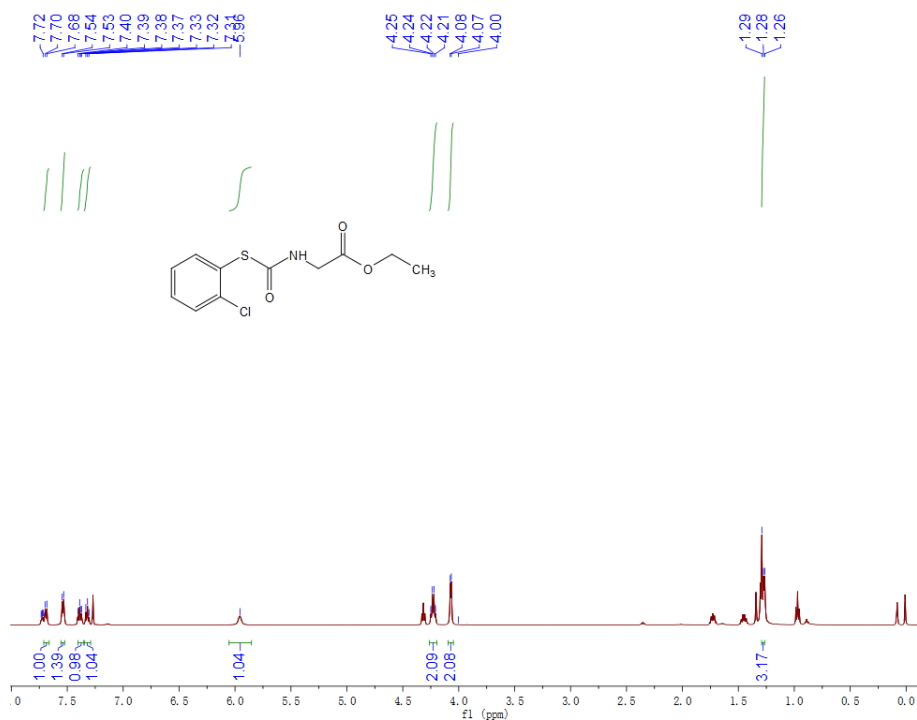

**Figure S26.** <sup>1</sup>H NMR for ethyl 2-((2-chlorophenylthio)carbonylamino)acetate

Ethyl 2-((2-chlorophenylthio)carbonylamino)acetate: Compound 4i was obtained in 66 % yield according to the general procedure. <sup>1</sup>H NMR (CDCl<sub>3</sub>, 400 MHz, ppm): δ 7.68 (dd, 7.6 Hz, 1H), 7.53 (d, 1H), 7.40-7.37 (m 1H), 7.33-7.30 (m, 1H), 5.96 (s, 1H), 4.24 (q, 2H), 4.07 (d, 2H), 1.28 (t, 3H).

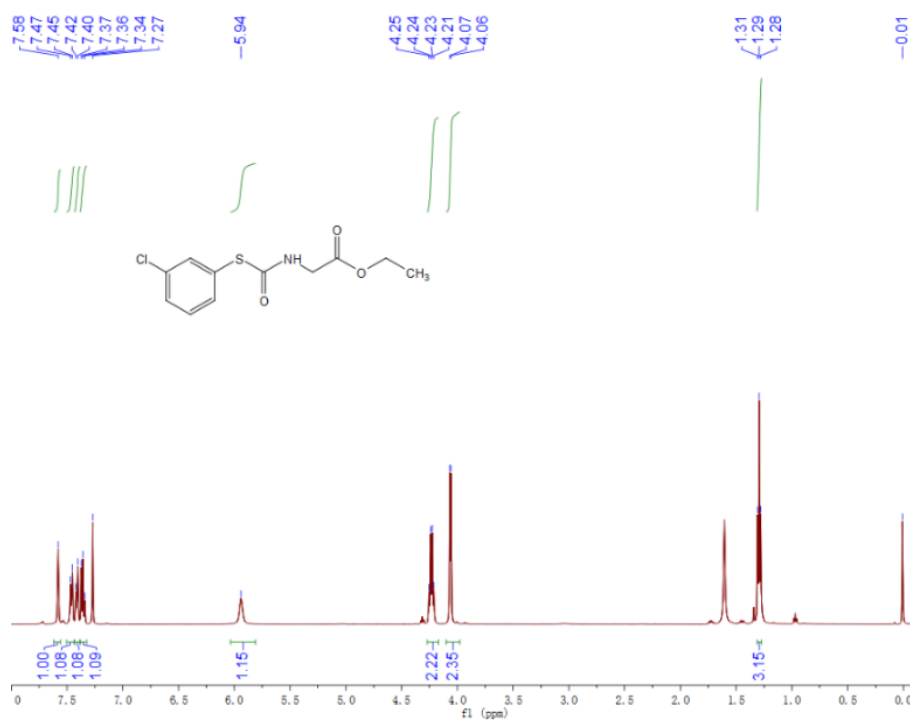

**Figure S27.** <sup>1</sup>H NMR for ethyl 2-((3-chlorophenylthio)carbonylamino)acetate

Ethyl 2-((3-chlorophenylthio)carbonylamino)acetate: Compound 4j was obtained in 83 % yield according to the general procedure. <sup>1</sup>H NMR (CDCl<sub>3</sub>, 400 MHz, ppm): δ 7.58 (s, 1H), 7.47 (d, J = 7.6 Hz, 1H), 7.37-7.34 (m, 1H), 7.36 (t, 1H), 5.94 (s, 1H), 4.24 (q, 2H), 4.07 (d, 2H), 1.29 (t, J = 7.1 Hz, 3H).



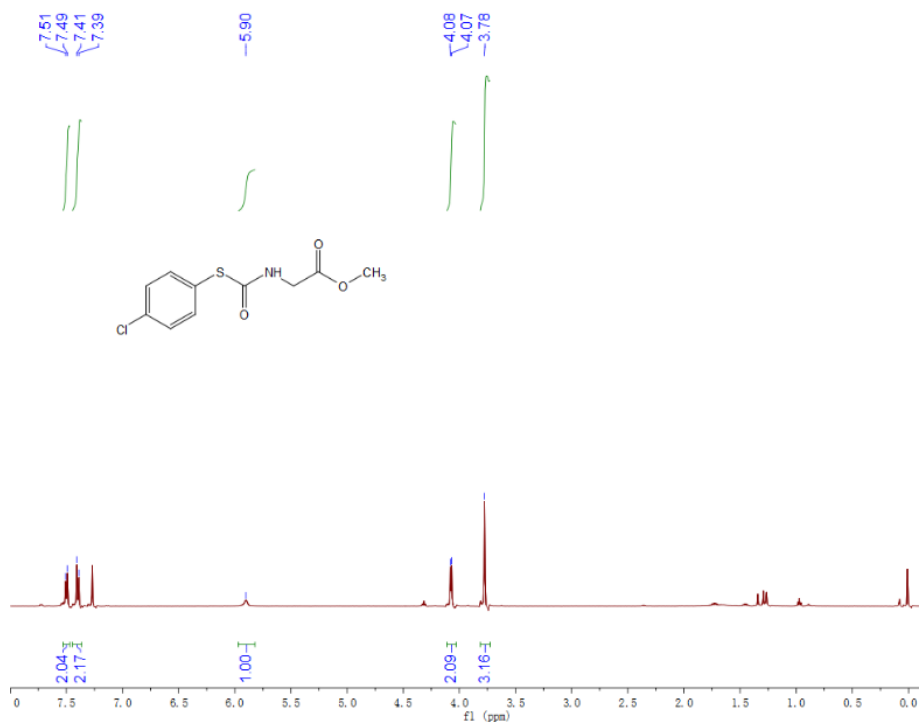

**Figure S28.** <sup>1</sup>H NMR for methyl ((4-chlorophenyl)thio)carbonyl glycinate

Methyl ((4-chlorophenyl)thio)carbonyl glycinate: Compound 4k was obtained in 88 % yield according to the general procedure. <sup>1</sup>H NMR (CDCl<sub>3</sub>, 400 MHz, ppm): δ 7.51-7.49 (d, 2H), 7.41-7.39 (d, 1H), 5.91 (s, 1H), 4.07 (d, 2H), 3.78 (s, 3H).

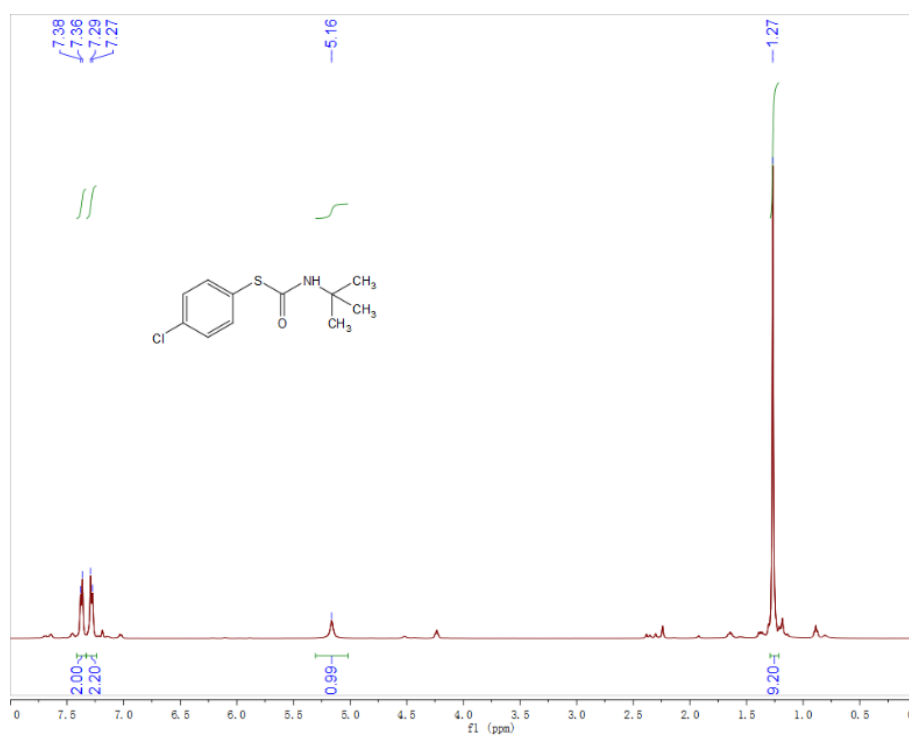

**Figure S29.** <sup>1</sup>H NMR for S-4-chlorophenyl *tert*-butylcarbamothioate  
 S-4-chlorophenyl *tert*-butylcarbamothioate: Compound 4I was obtained in 63 % yield according to the general procedure. <sup>1</sup>H NMR (CDCl<sub>3</sub>, 400 MHz, ppm): δ 7.38 (d, 2H), 7.29 (d, 2H), 5.16 (s, 1H), 1.27 (s, 9H).

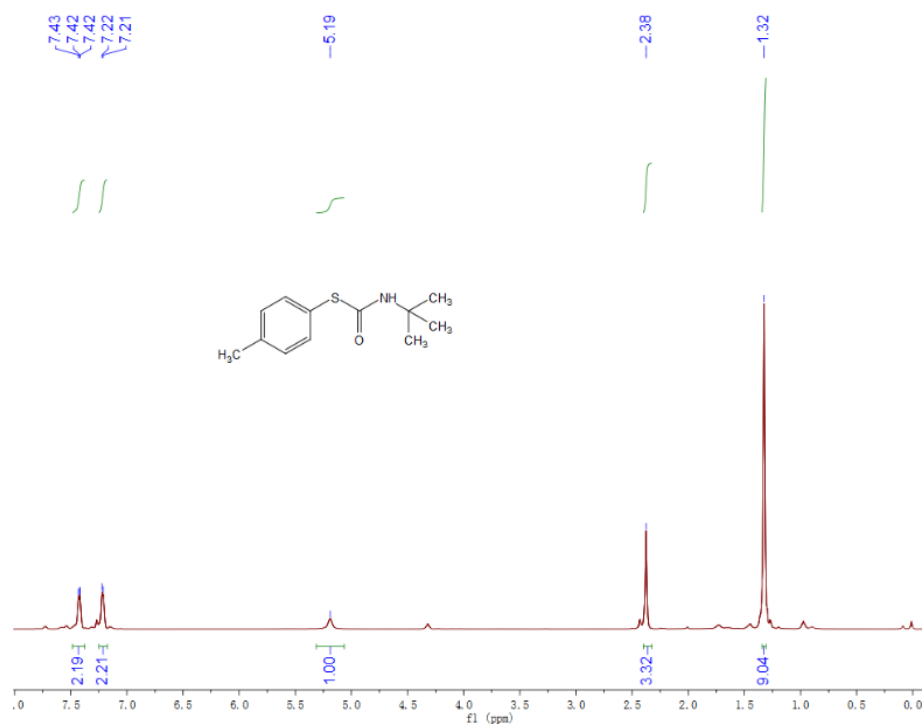

**Figure S30.** <sup>1</sup>H NMR for S-p-tolyl *tert*-butylcarbamothioate

S-p-tolyl *tert*-butylcarbamothioate: Compound 40 was obtained in 58 % yield according to the general procedure. <sup>1</sup>H NMR (CDCl<sub>3</sub>, 400 MHz, ppm): δ 7.43 (d, 2H), 7.21 (d, 2H), 5.19 (s, 1H), 2.32 (s, 3H), 1.38 (s, 9H).

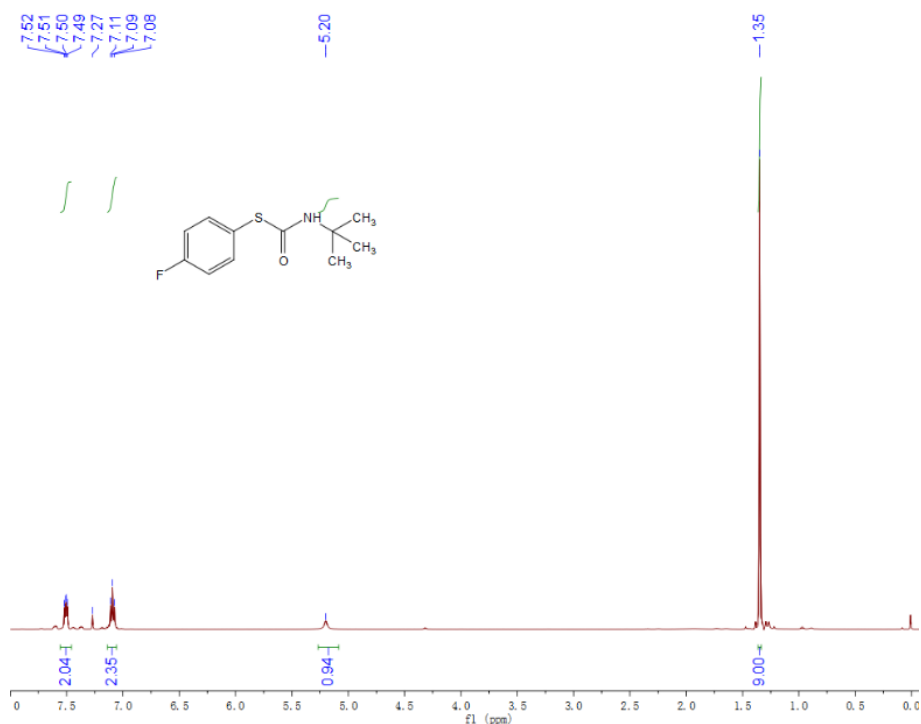

**Figure S31.**  $^1\text{H}$  NMR for *S*-(4-fluorophenyl) tert-butylcarbamothioate *S*-(4-fluorophenyl)tert-butylcarbamothioate: Compound 4p was obtained in 61% yield according to the general procedure.  $^1\text{H}$  NMR ( $\text{CDCl}_3$ , 400 MHz, ppm):  $\delta$  7.51–7.48 (m, 2H), 7.08 (t, 2H), 5.19 (s, 1H), 1.34 (s, 9H).

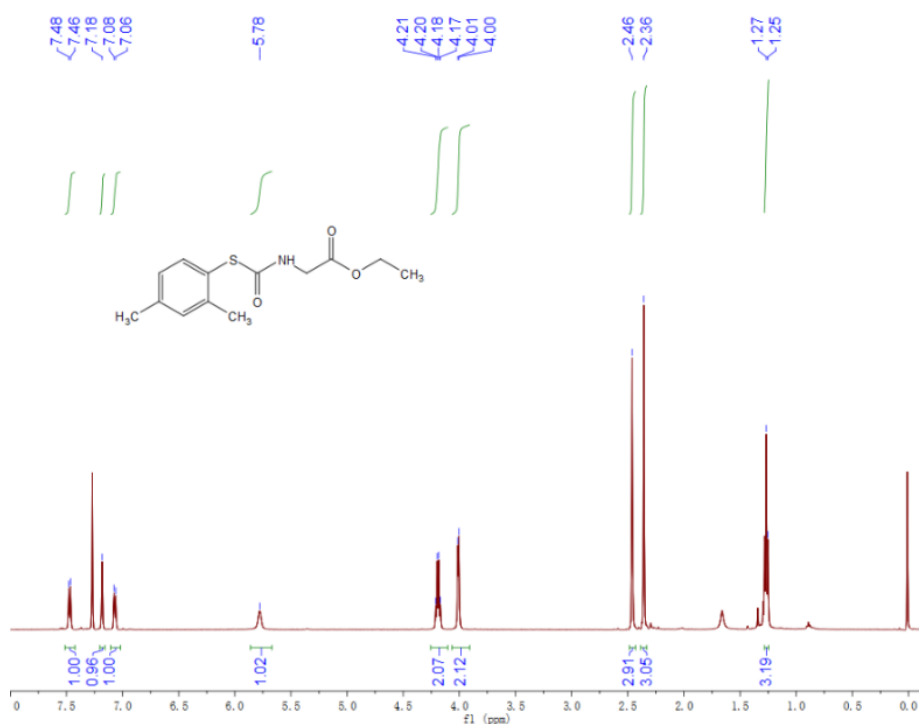

**Figure S32.**  $^1\text{H}$  NMR for ethyl (((2,4-dimethylphenyl)thio)carbonyl)glycinate

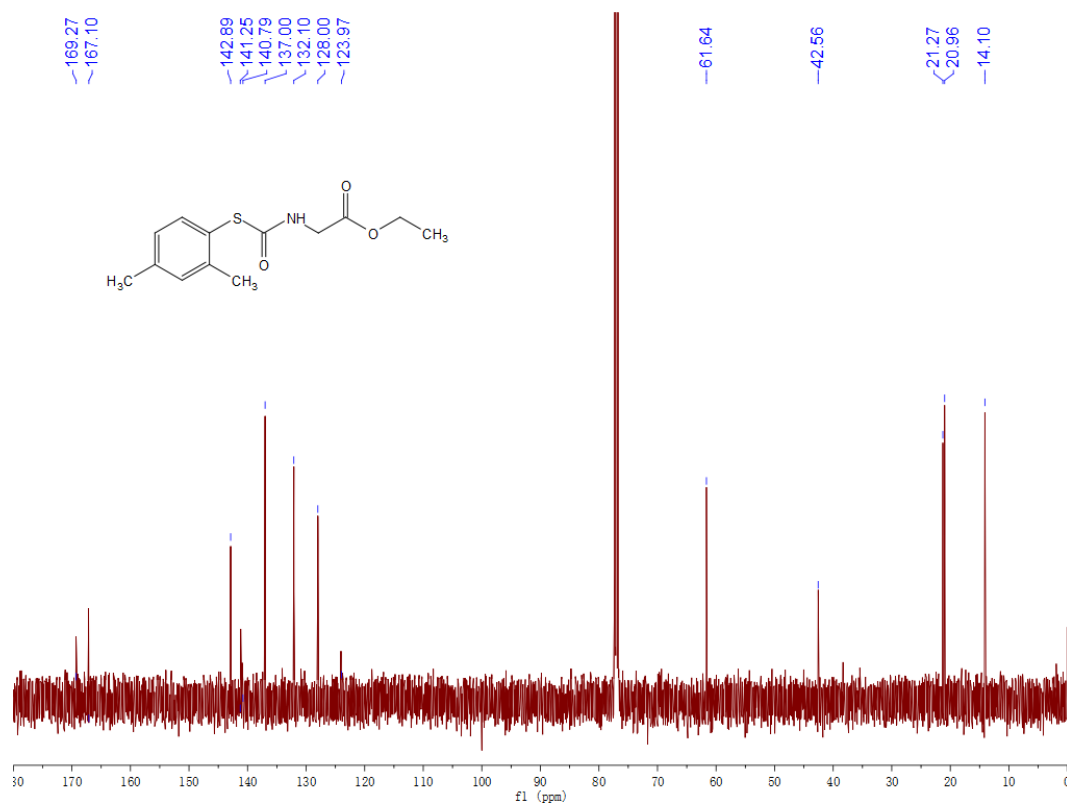

**Figure S33.**  $^{13}\text{C}$  NMR for ethyl (((2,4-dimethylphenyl)thio)carbonyl)glycinate

Ethyl (((2,4-dimethylphenyl)thio)carbonyl)glycinate: Compound 4q was obtained in 75 % yield according to the general procedure .  $^1\text{H}$  NMR ( $\text{CDCl}_3$ , 400 MHz, ppm):  $\delta$  7.47 (d, 1H), 7.18 (s, 1H), 7.07 (d, 1H), 7.33-7.30 (m, 1H), 5.78 (s, 1H), 4.20 (q, 2H), 4.01 (d, 2H), 2.46 (s, 1H), 2.36 (s, 1H), 1.25 (t, 3H);  $^{13}\text{C}$  NMR ( $\text{CDCl}_3$ , 125 MHz, ppm):  $\delta$  169.2, 167.2, 142.9, 141.2, 140.9, 137.0, 132.1, 128.0, 124.1, 61.6, 42.6, 21.3, 20.9, 14.1.

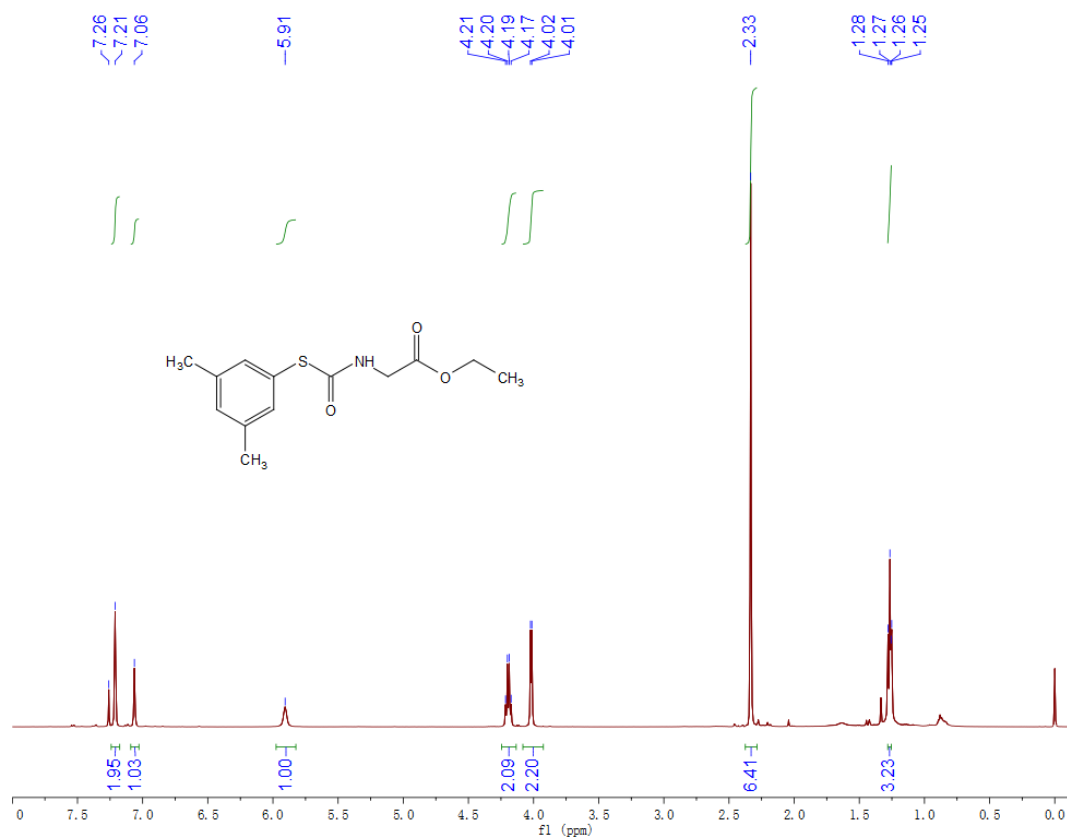

**Figure S34.**  $^1\text{H}$  NMR for ethyl ((3,5-dimethylphenyl)thio)carbonyl glycinate

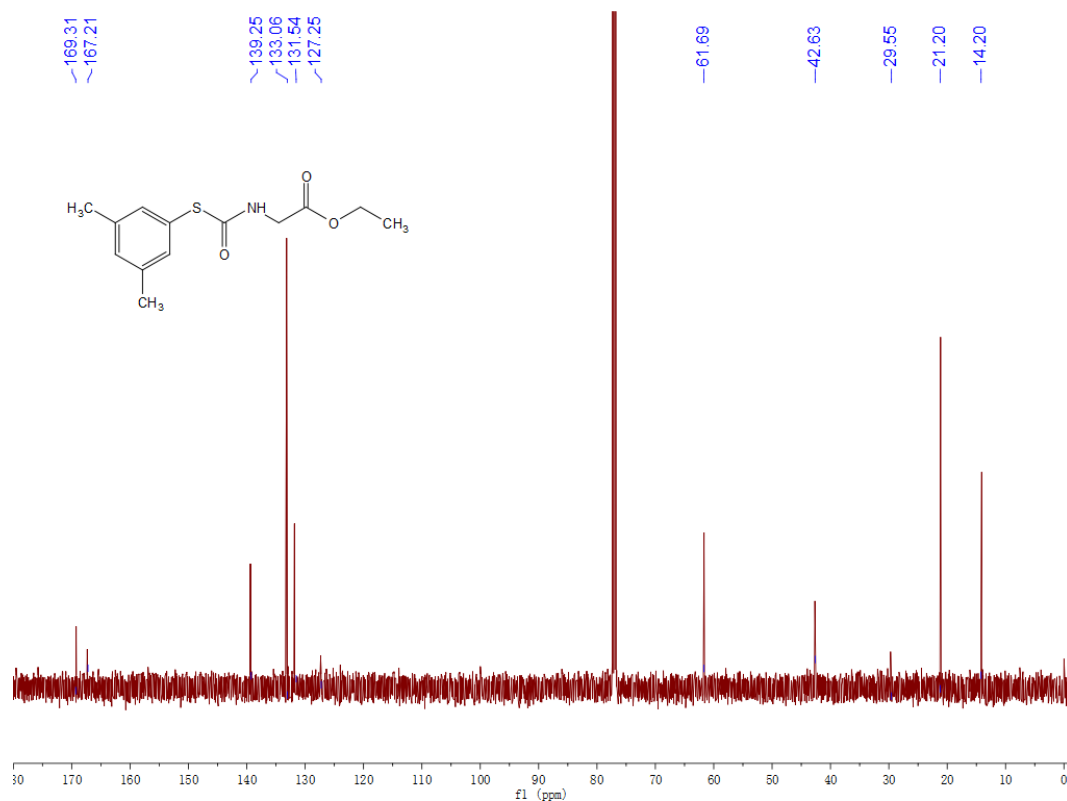

**Figure S35.** <sup>13</sup>C NMR for ethyl (((3,5-dimethylphenyl)thio)carbonyl)glycinate

Ethyl (((3,5-dimethylphenyl)thio)carbonyl)glycinate: Compound 4r was obtained in 82 % yield according to the general procedure. <sup>1</sup>H NMR (CDCl<sub>3</sub>, 400 MHz, ppm): δ 7.21(s, 2H), 7.06 (s, 1H), 5.91 (s, 1H), 4.20 (q, 2H), 4.02 (d, 2H), 2.33 (s, 6H) 1.28-1.25 (t, 3H). <sup>13</sup>C NMR (CDCl<sub>3</sub>, 125 MHz, ppm): δ 169.3, 167.2, 139.2, 133.0, 131.5, 127.2, 61.7, 42.6, 29.5, 21.2, 14.2.

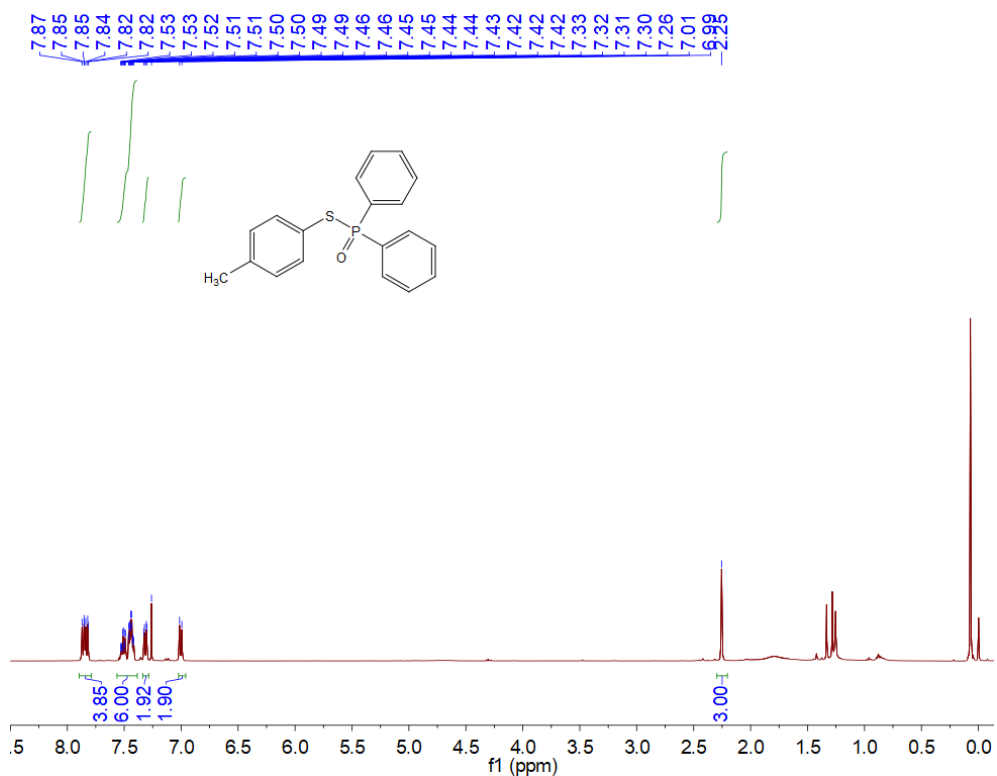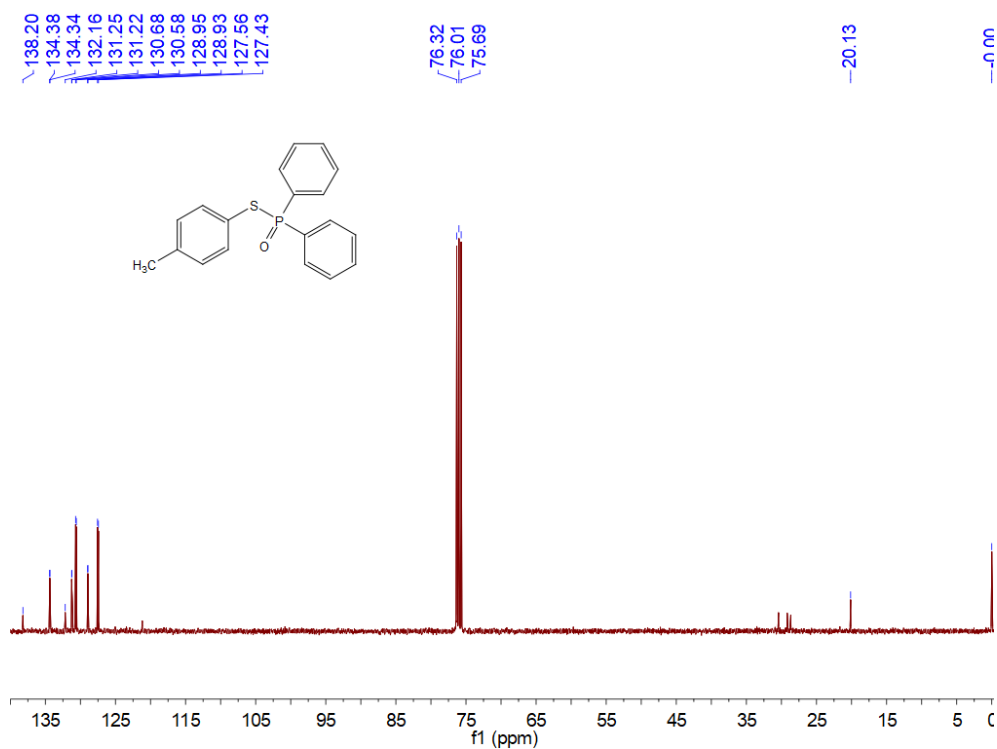

***S*-(*p*-tolyl) diphenylphosphinothioate:** <sup>1</sup>H NMR (CDCl<sub>3</sub>, 400 MHz): δ 7.87-7.82 (m, 4H), 7.53-7.42(m, 6H), 7.33-7.30 (dd, *J* = 4.0 Hz, 2H), 7.01-6.99 (d, *J* = 8.0 Hz, 2H), 2.25 (s, 3H). <sup>13</sup>C NMR (CDCl<sub>3</sub>, 100 MHz): δ 138.2, 134.4, 134.3, 132.2, 131.2, 130.7, 130.6, 128.9, 127.6, 127.4, 20.1.



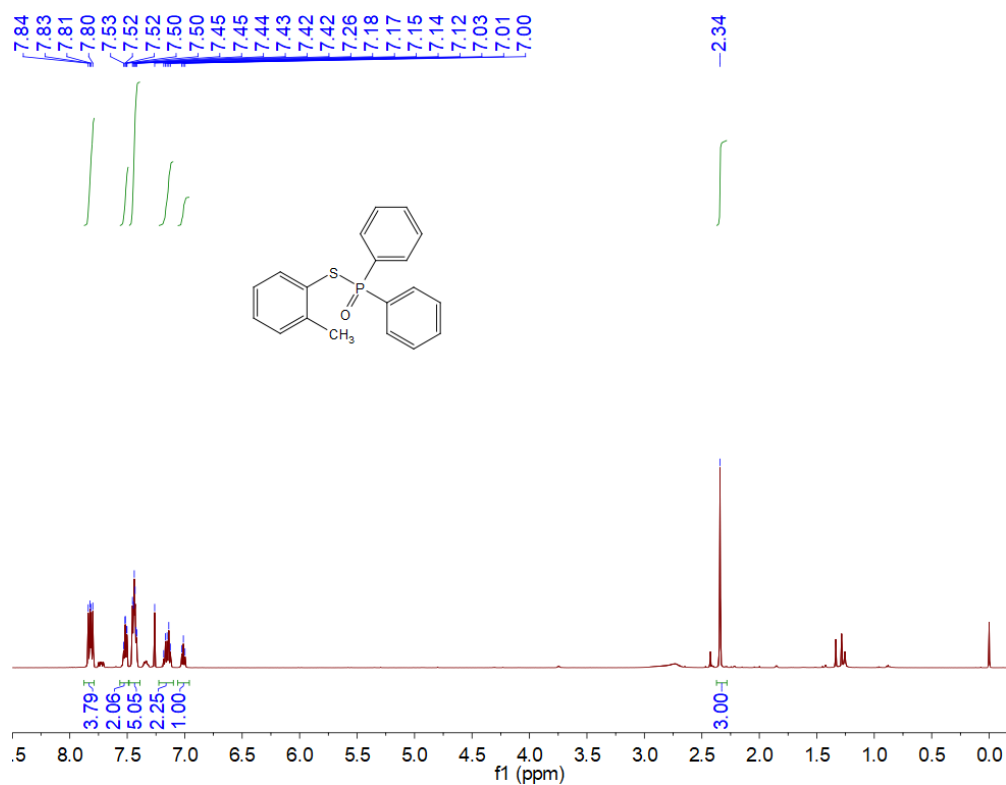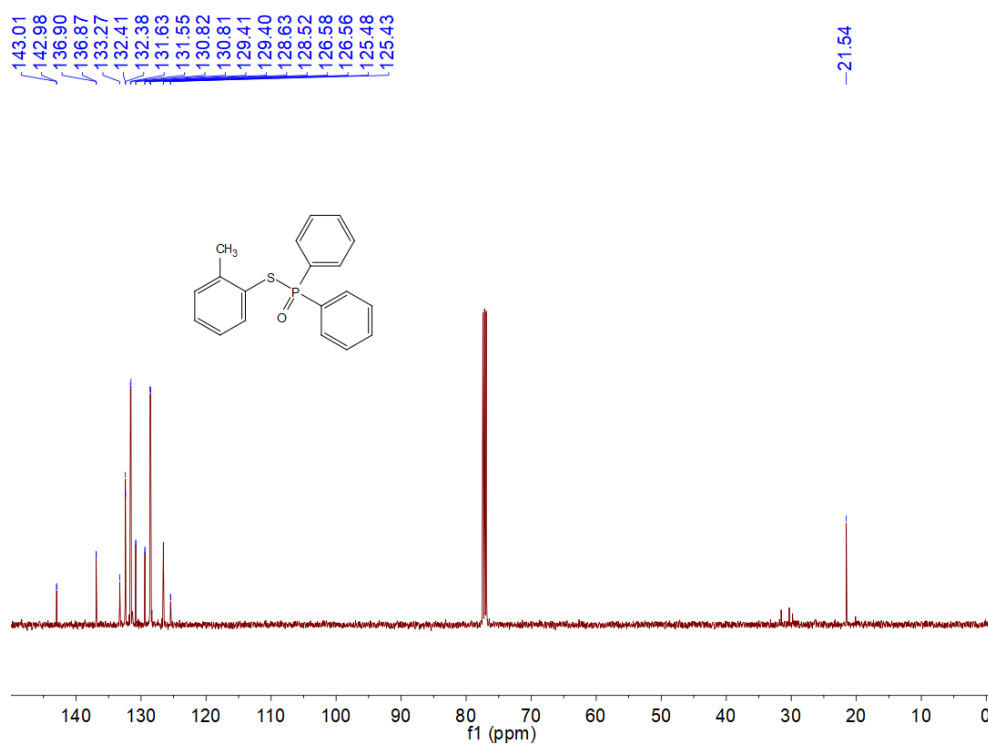

***S*-(*o*-tolyl) diphenylphosphinothioate:**  $^1\text{H}$  NMR (CDCl<sub>3</sub>, 400 MHz):  $\delta$  7.84-7.80 (m, 4H), 7.53-7.50(m, 2H), 7.45-7.42 (m, 5H), 7.18-7.12 (m, 2H), 7.03-7.00 (m, 1H), 2.34(s, 3H).  $^{13}\text{C}$  NMR (CDCl<sub>3</sub>, 100

MHz):  $\delta$  143.0, 142.9, 136.9, 136.8, 133.3, 132.4, 131.6, 131.5, 130.8, 129.4, 128.6, 128.5, 126.6, 126.5, 125.5, 125.4, 21.5.

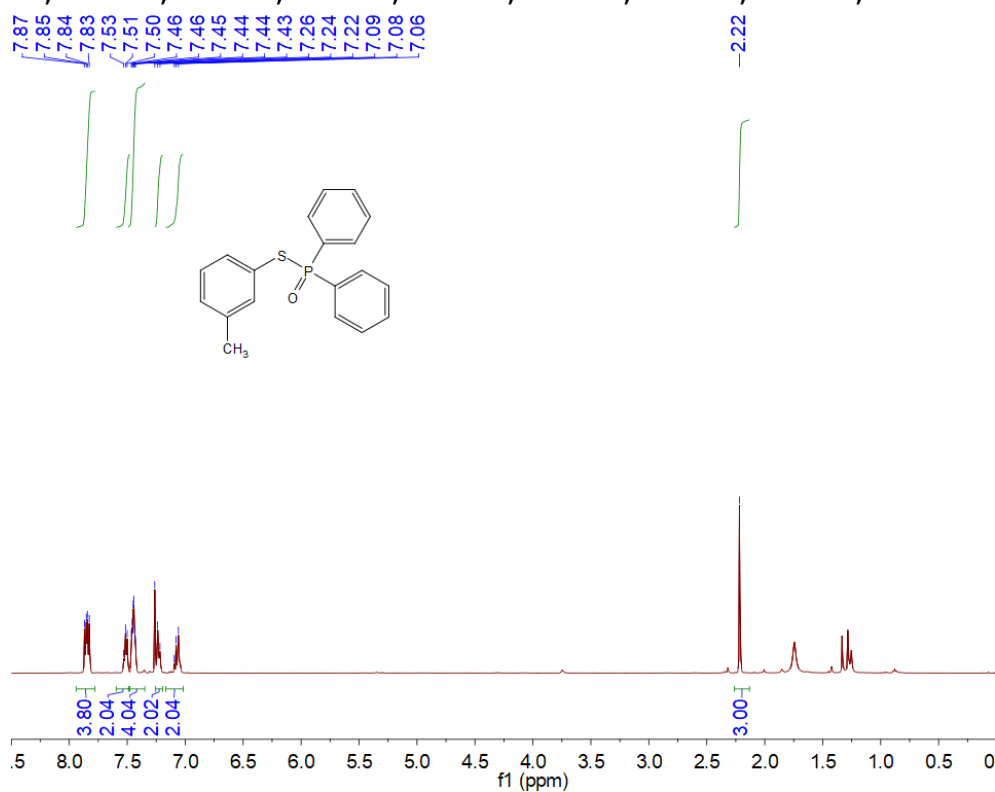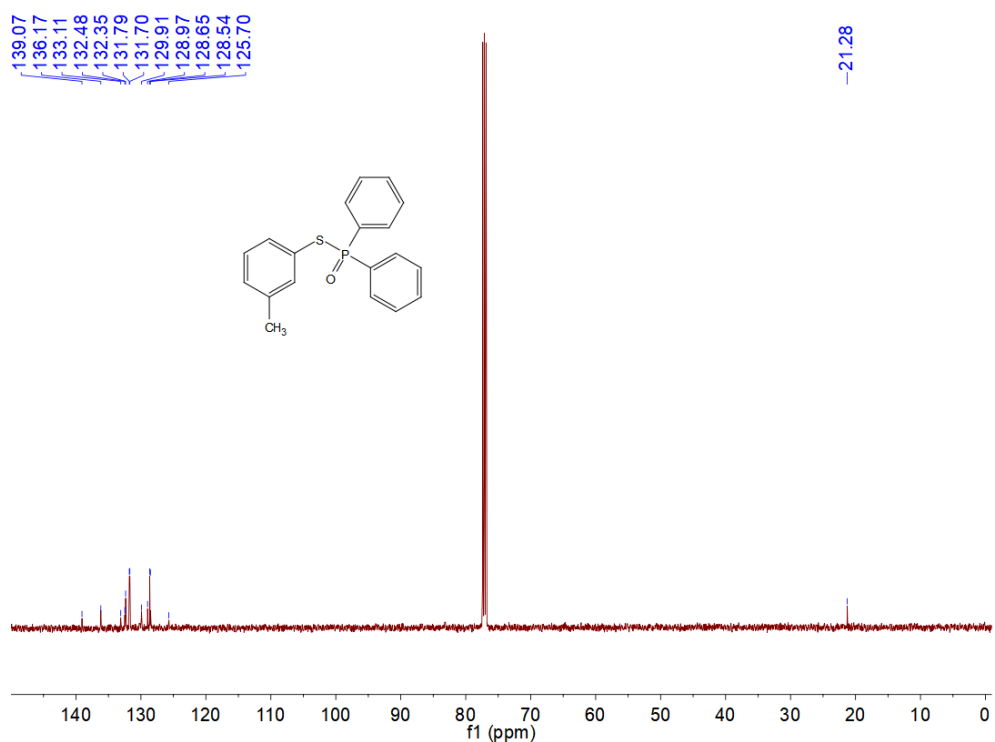

***S*-(*m*-tolyl) diphenylphosphinothioate:**  $^1\text{H}$  NMR ( $\text{CDCl}_3$ , 400 MHz):  $\delta$  7.87-7.83 (m, 4H), 7.53-7.50 (m, 2H), 7.46-7.42 (m, 4H), 7.24-

7.22 (d,  $J = 8.0$  Hz, 2H), 7.09-7.06 (m, 4H), 2.22 (s, 3H).  $^{13}\text{C}$  NMR (CDCl<sub>3</sub>, 100 MHz):  $\delta$  139.1, 136.2, 133.1, 132.4, 132.3, 131.8, 129.9, 128.9, 128.6, 128.5, 125.7, 21.3.

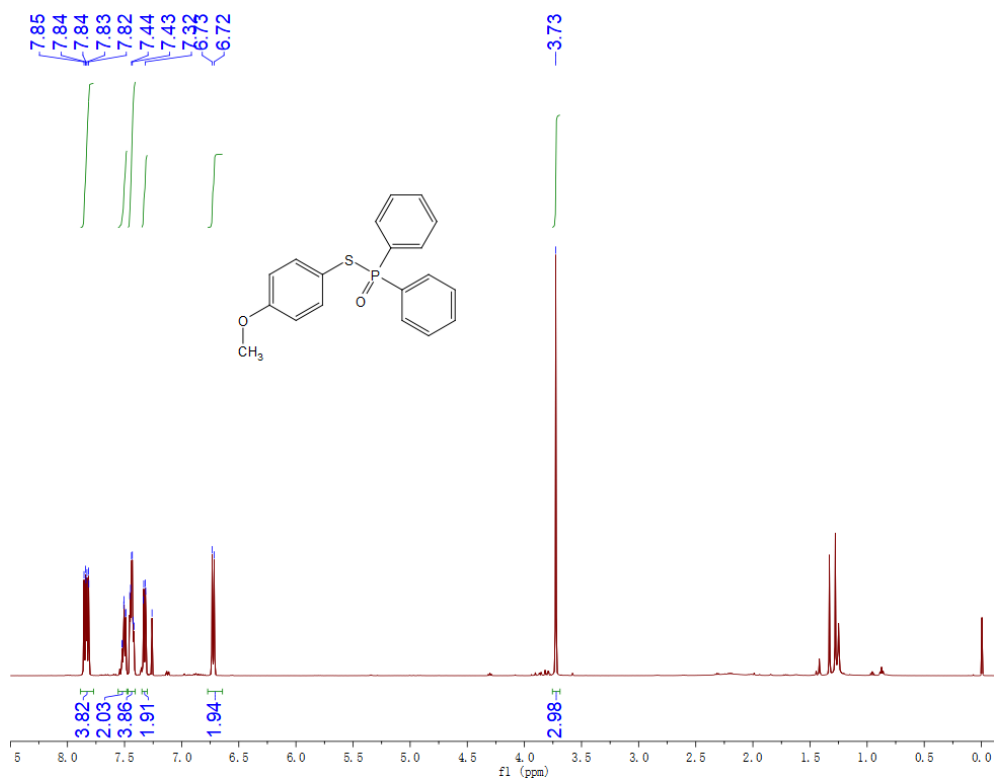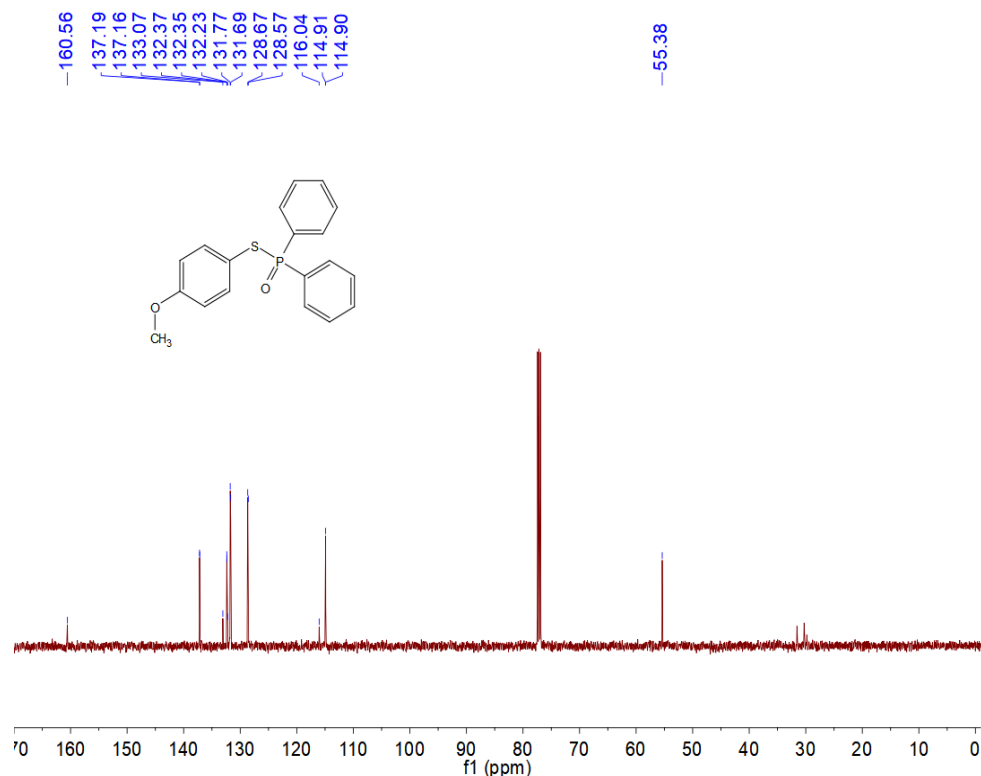

***S*-(4-methoxyphenyl) diphenylphosphinothioate:**  $^1\text{H}$  NMR (CDCl<sub>3</sub>, 400 MHz):  $\delta$  7.85-7.81 (m, 4H), 7.52-7.49 (m, 2H), 7.45-

7.42 (m, 4H), 7.33-7.31 (d,  $J = 8.0$  Hz, 2H), 6.73-6.72 (m, 2H), 3.73 (s, 3H).  $^{13}\text{C}$  NMR ( $\text{CDCl}_3$ , 100 MHz):  $\delta$  160.5, 137.2, 133.1, 132.4, 132.8, 132.7, 128.7, 128.6, 116.0, 114.9, 55.4.

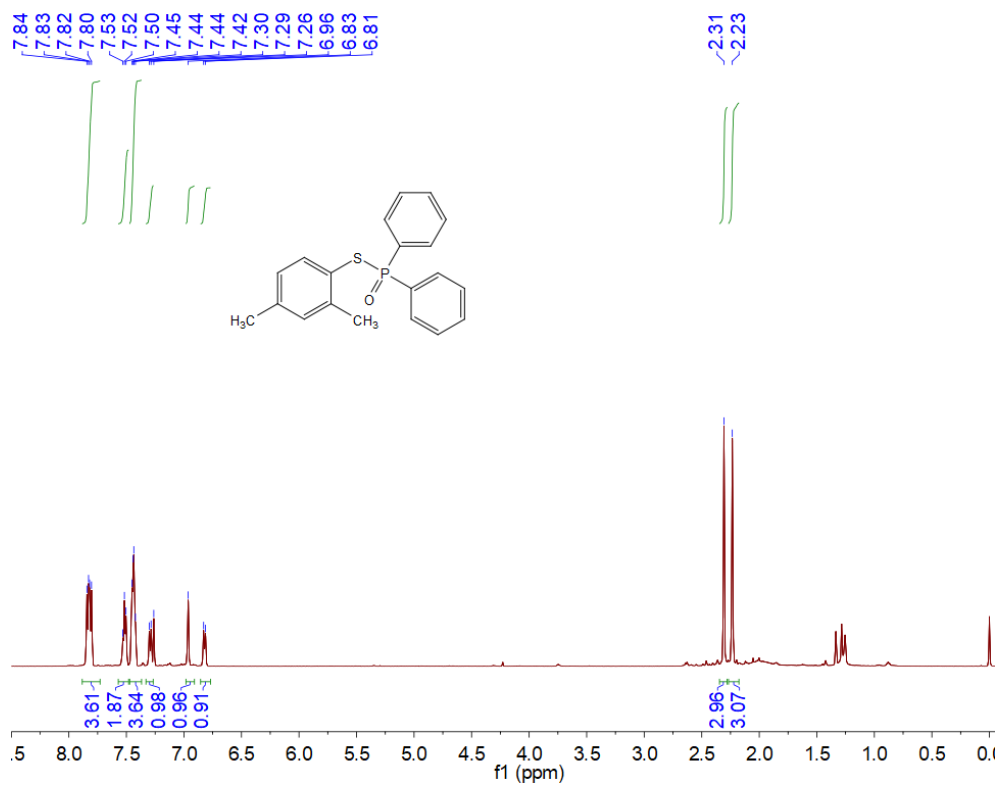

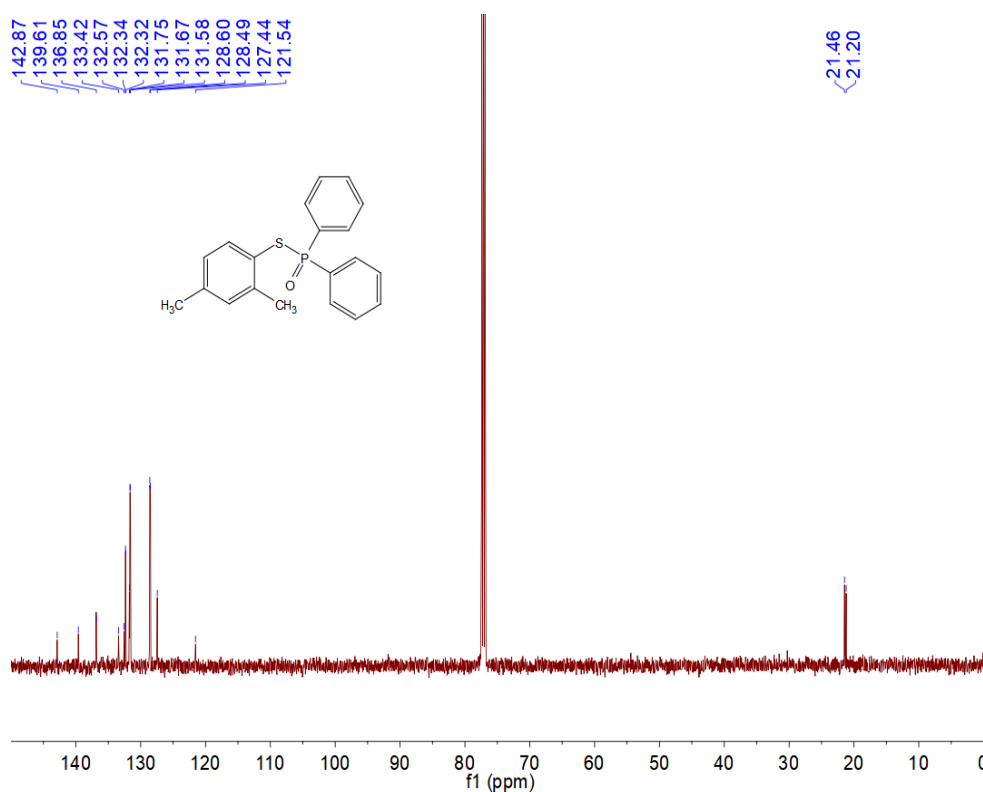

***S*-(2,4-dimethylphenyl) diphenylphosphinothioate:** <sup>1</sup>H NMR (CDCl<sub>3</sub>, 400 MHz): δ 7.84-7.80 (m, 4H), 7.53-7.50 (m, 2H), 7.30-7.29 (m, 1H), 6.96 (s, 1H), 6.83-6.81 (d, *J* = 8.0 Hz, 2H), 2.31 (s, 1H), 2.31 (s, 1H). <sup>13</sup>C NMR (CDCl<sub>3</sub>, 100 MHz): δ 142.9, 139.6, 136.9, 133.4, 132.6, 132.3, 131.7, 131.6, 131.5, 128.6, 128.5, 127.4, 121.5, 21.4, 21.3.

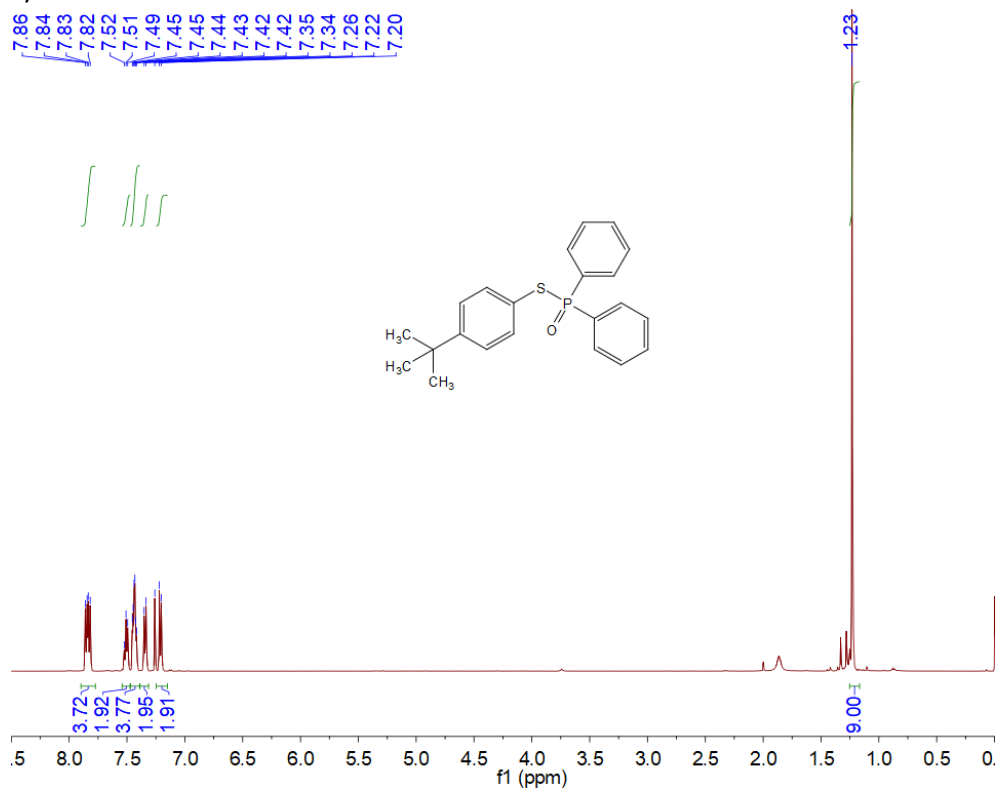

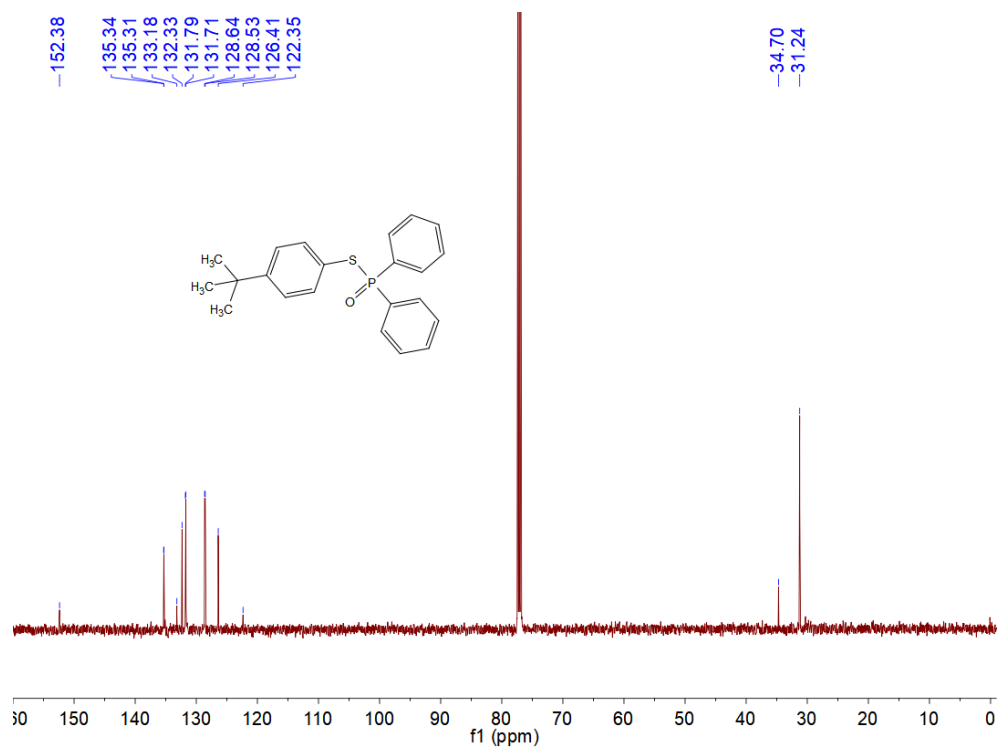

***S*-(4-(*tert*-butyl)phenyl) diphenylphosphinothioate:** <sup>1</sup>H NMR (CDCl<sub>3</sub>, 400 MHz): δ 7.86-7.82 (m, 4H), 7.52-7.49 (m, 2H), 7.45-7.42 (m, 4H), 7.35-7.34 (d, *J* = 8.0 Hz, 2H), 7.22-7.20 (d, *J* = 8.0 Hz, 2H), 1.23 (s, 9H). <sup>13</sup>C NMR (CDCl<sub>3</sub>, 100 MHz): δ 152.4, 135.3, 132.3, 131.8, 131.7, 128.6, 128.5, 126.4, 122.4, 34.7, 31.2.

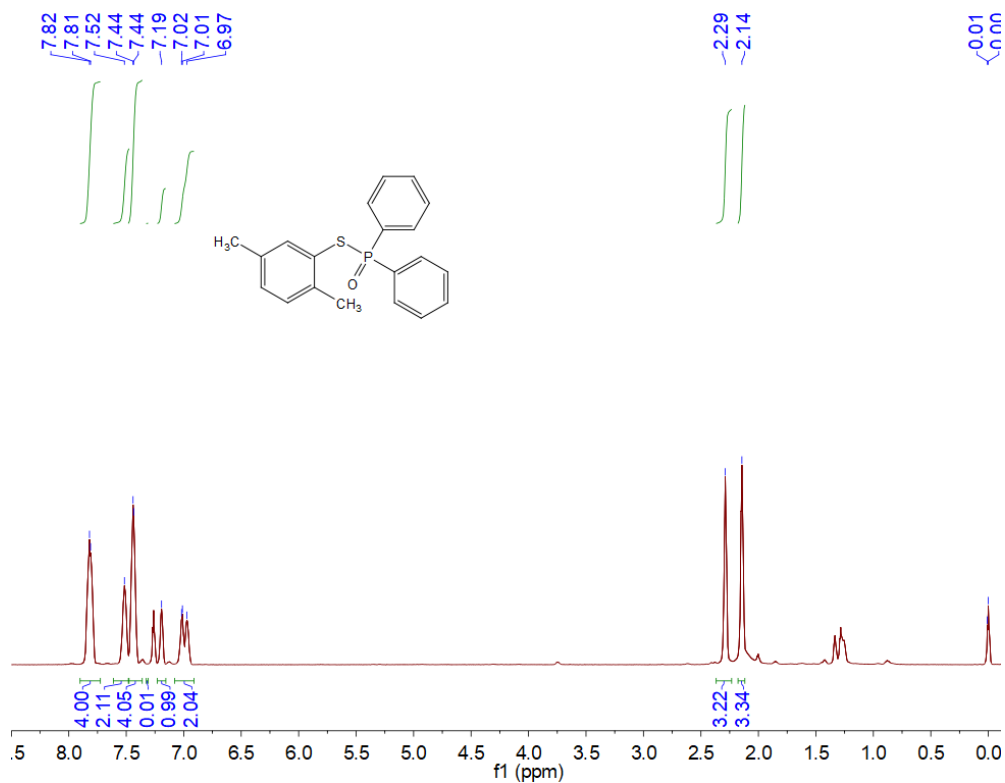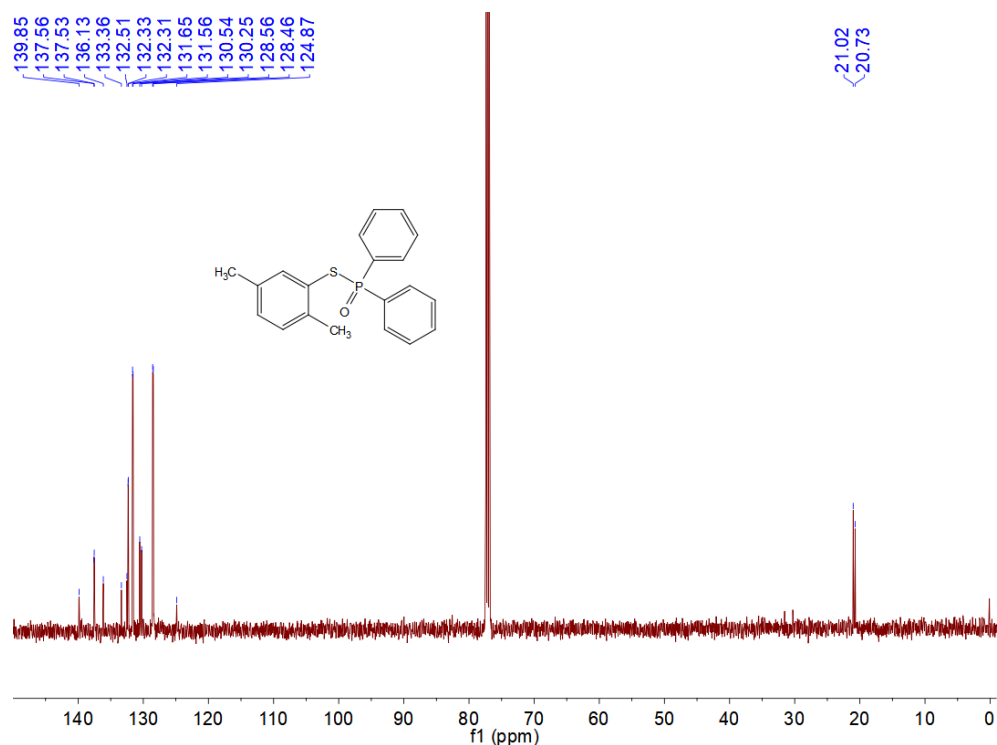

***S*-(2,5-dimethylphenyl) diphenylphosphinothioate:** <sup>1</sup>H NMR (CDCl<sub>3</sub>, 400 MHz): δ 7.82-7.81 (m, 4H), 7.52-7.44 (m, 6H), 7.19 (s, 1H), 7.02-6.97 (d, *J* = 8.0 Hz, 2H), 2.29 (s, 3H), 2.14 (s, 3H). <sup>13</sup>C NMR (CDCl<sub>3</sub>, 100 MHz): δ 139.8, 137.6, 136.1, 133.4, 132.5, 132.3, 131.7, 131.6, 130.5, 130.3, 128.6, 128.5, 124.9, 21.0, 20.7.

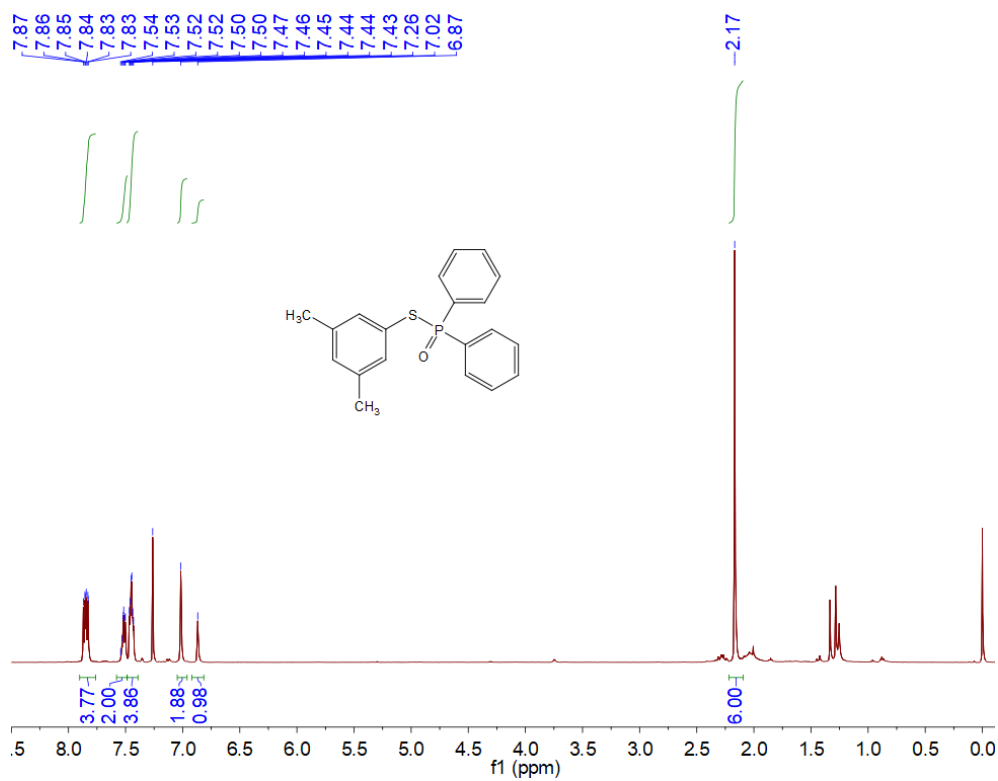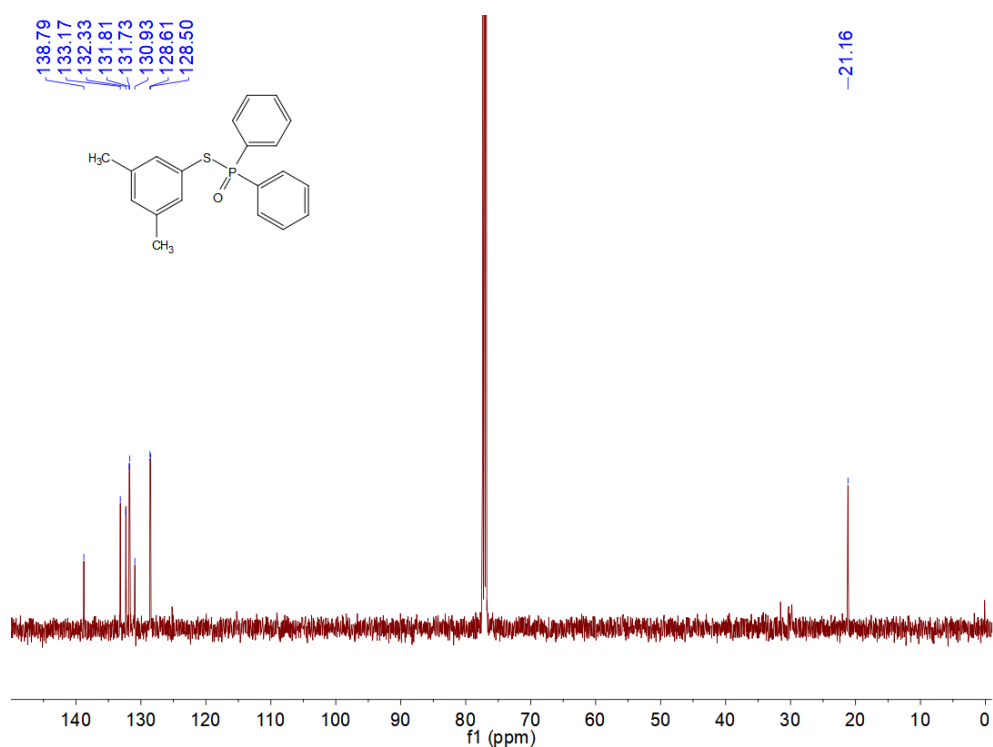

***S*-(3,5-dimethylphenyl) diphenylphosphinothioate:**  $^1\text{H}$  NMR (CDCl<sub>3</sub>, 400 MHz):  $\delta$  7.87-7.83 (m, 4H), 7.53-7.50 (m, 2H), 7.47-7.43 (m, 4H), 7.02 (s, 1H), 6.87 (s, 1H), 2.17 (s, 6H).  $^{13}\text{C}$  NMR (CDCl<sub>3</sub>, 100 MHz):  $\delta$  138.8, 133.2, 132.3, 131.8, 131.7, 130.9, 128.6, 128.5,



21.2.

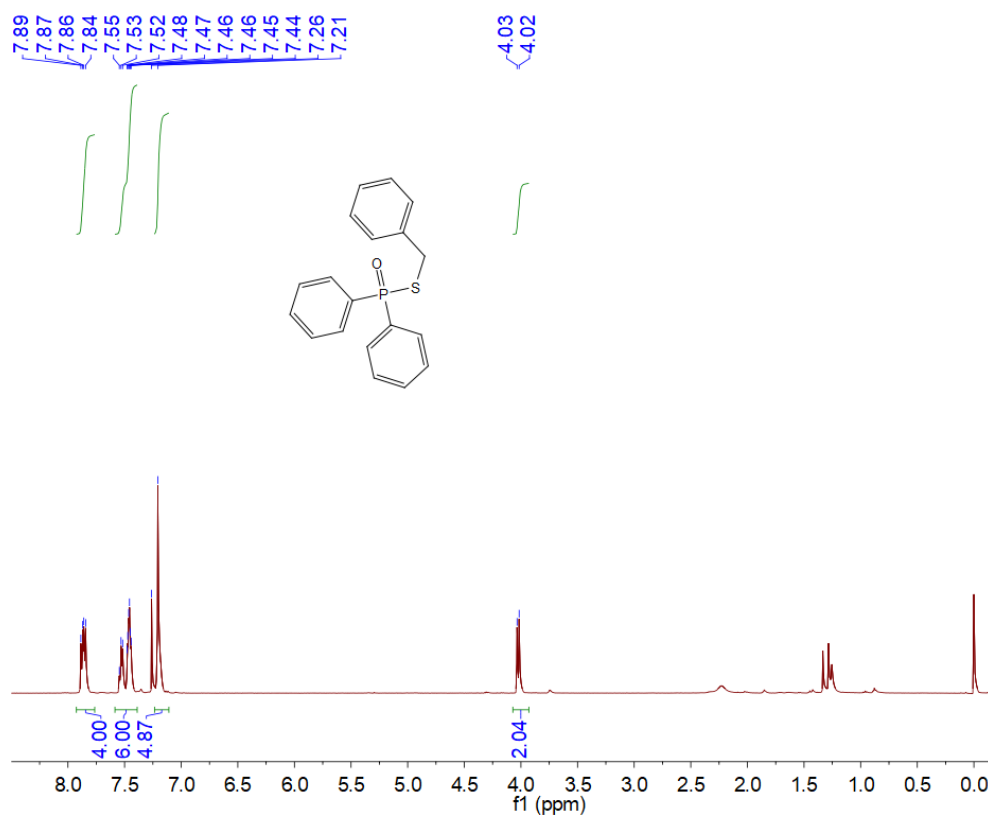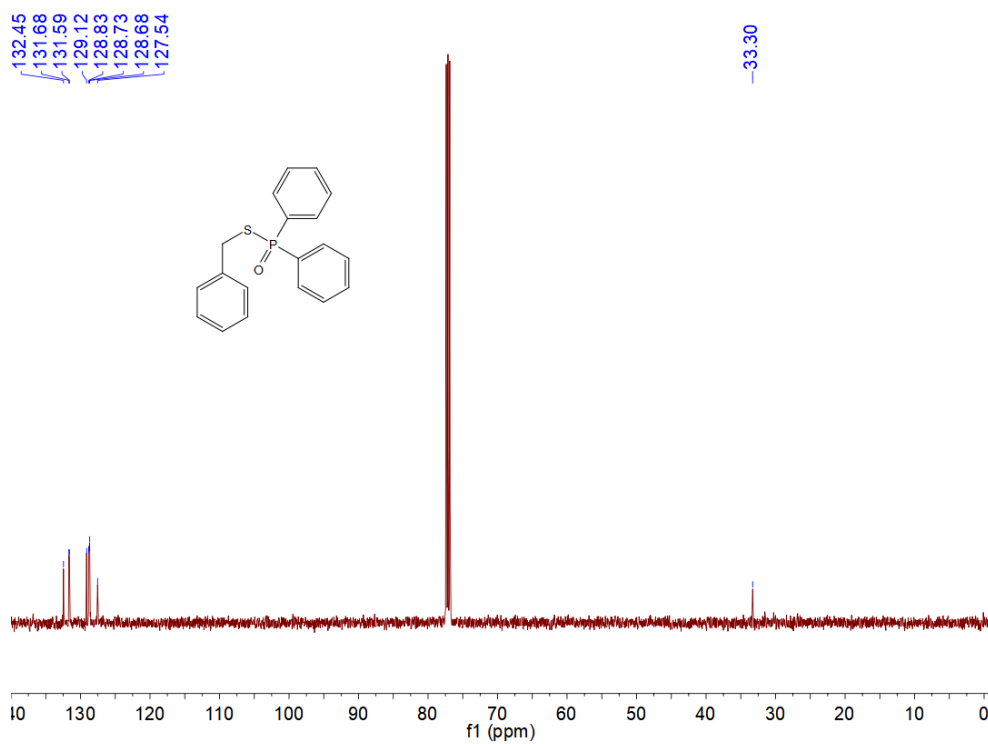

***S*-benzyl diphenylphosphinothioate:** <sup>1</sup>H NMR (CDCl<sub>3</sub>, 400 MHz):

$\delta$  7.89-7.84 (m, 4H), 7.55-7.44 (m, 6H), 7.21 (m, 5H), 4.02. (d,  $J = 4.0$  Hz, 2H).  $^{13}\text{C}$  NMR ( $\text{CDCl}_3$ , 100 MHz):  $\delta$  132.5, 131.7, 131.6, 129.1, 128.8, 128.7, 128.6, 127.5, 33.3.

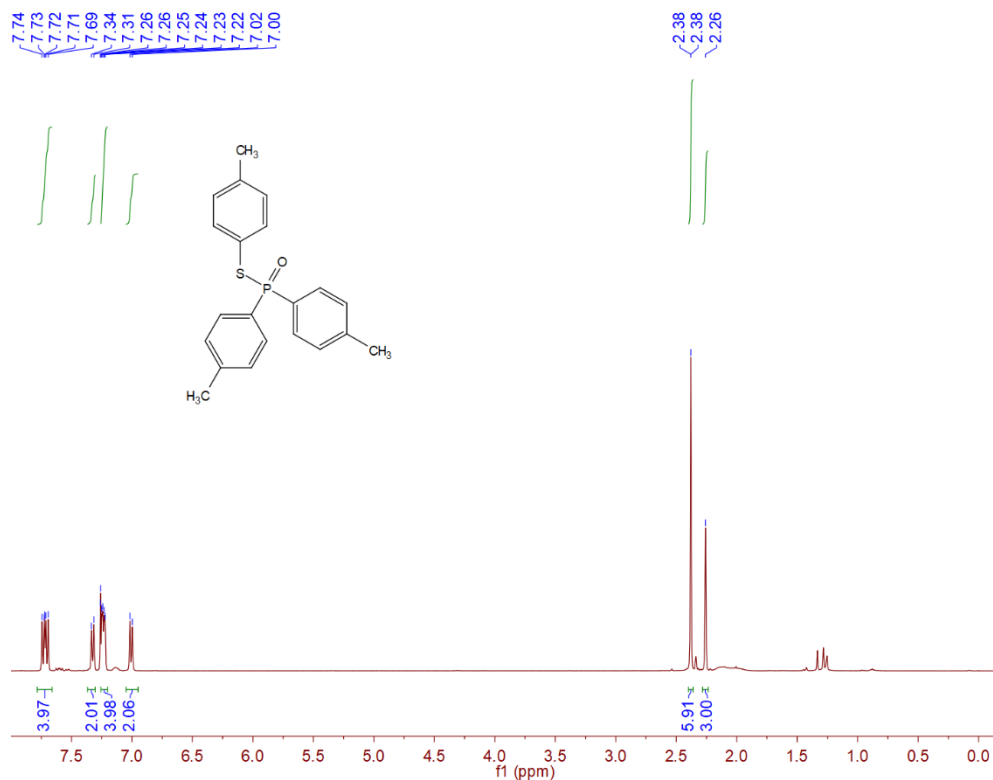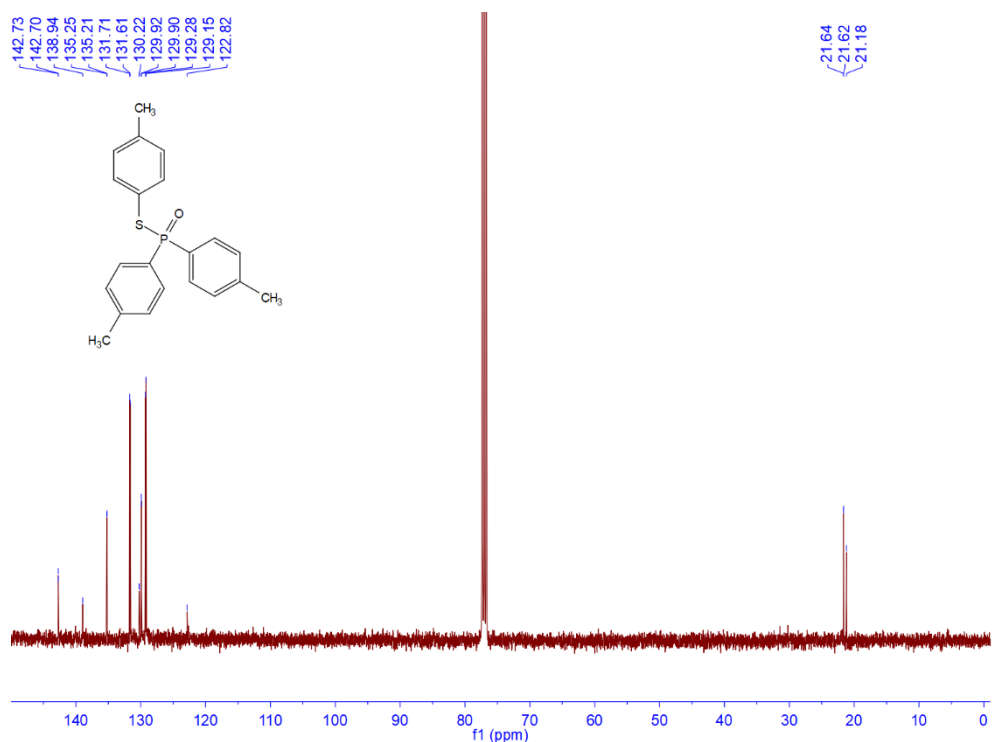

***S*-(*p*-tolyl) di-*p*-tolylphosphinothioate:**  $^1\text{H}$  NMR ( $\text{CDCl}_3$ , 400 MHz):  $\delta$  7.74-7.69 (m, 4H), 7.33-7.31 (d,  $J = 8.0$  Hz, 2H), 7.25-7.22 (m, 4H), 7.02-7.00 (d,  $J = 4.0$  Hz, 2H), 2.38 (s, 6H), 2.26 (s, 3H).  $^{13}\text{C}$  NMR ( $\text{CDCl}_3$ , 100 MHz):  $\delta$  142.7, 138.9, 135.2, 131.7, 131.6, 130.2,

129.9, 129.3, 129.2, 122.8, 21.6, 21.2.

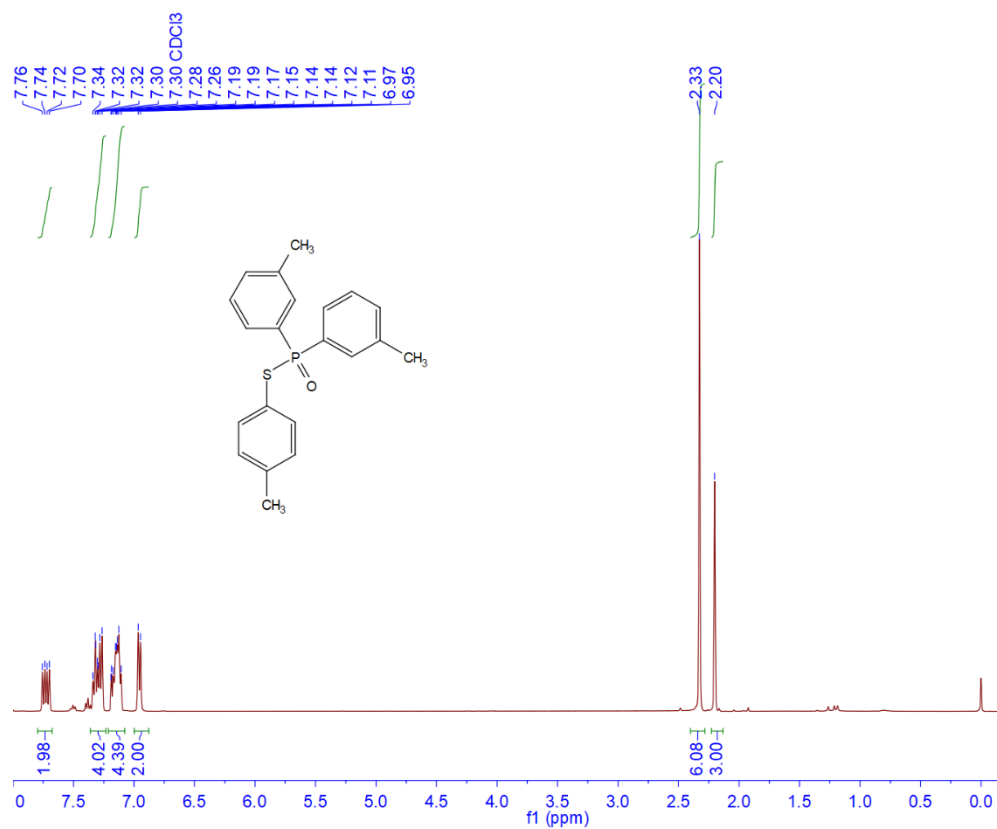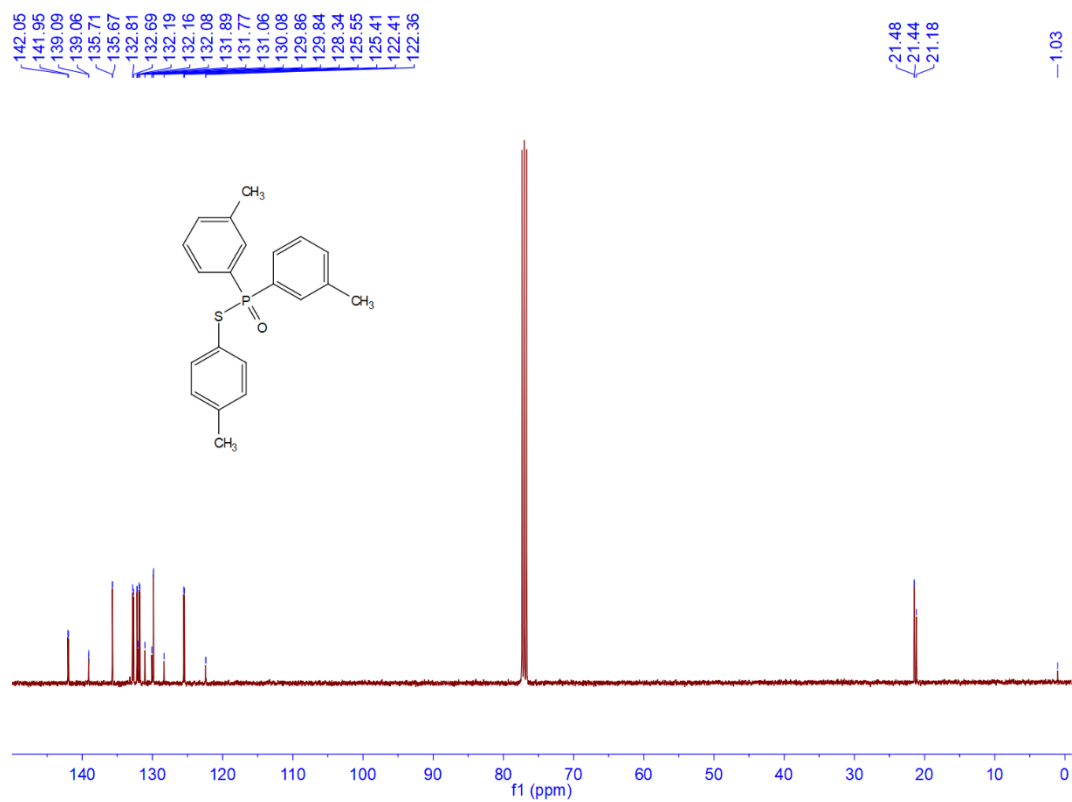

***S*-(*p*-tolyl) di-*m*-tolylphosphinothioate:**  $^1\text{H}$  NMR ( $\text{CDCl}_3$ , 400 MHz):  $\delta$  7.72-7.69 (q,  $J = 8.0$  Hz, 2H), 7.34-7.28 (m, 4H), 7.19-7.11 (m, 4H), 6.97-6.95 (d,  $J = 8.0$  Hz, 2H), 2.33 (s, 6H), 2.20 (s, 3H).  $^{13}\text{C}$  NMR ( $\text{CDCl}_3$ , 100 MHz):  $\delta$  142.0, 141.9, 139.0, 135.7, 132.8, 132.2, 131.0, 129.8, 128.3, 125.5, 125.4, 122.4, 21.5, 21.4, 21.2.

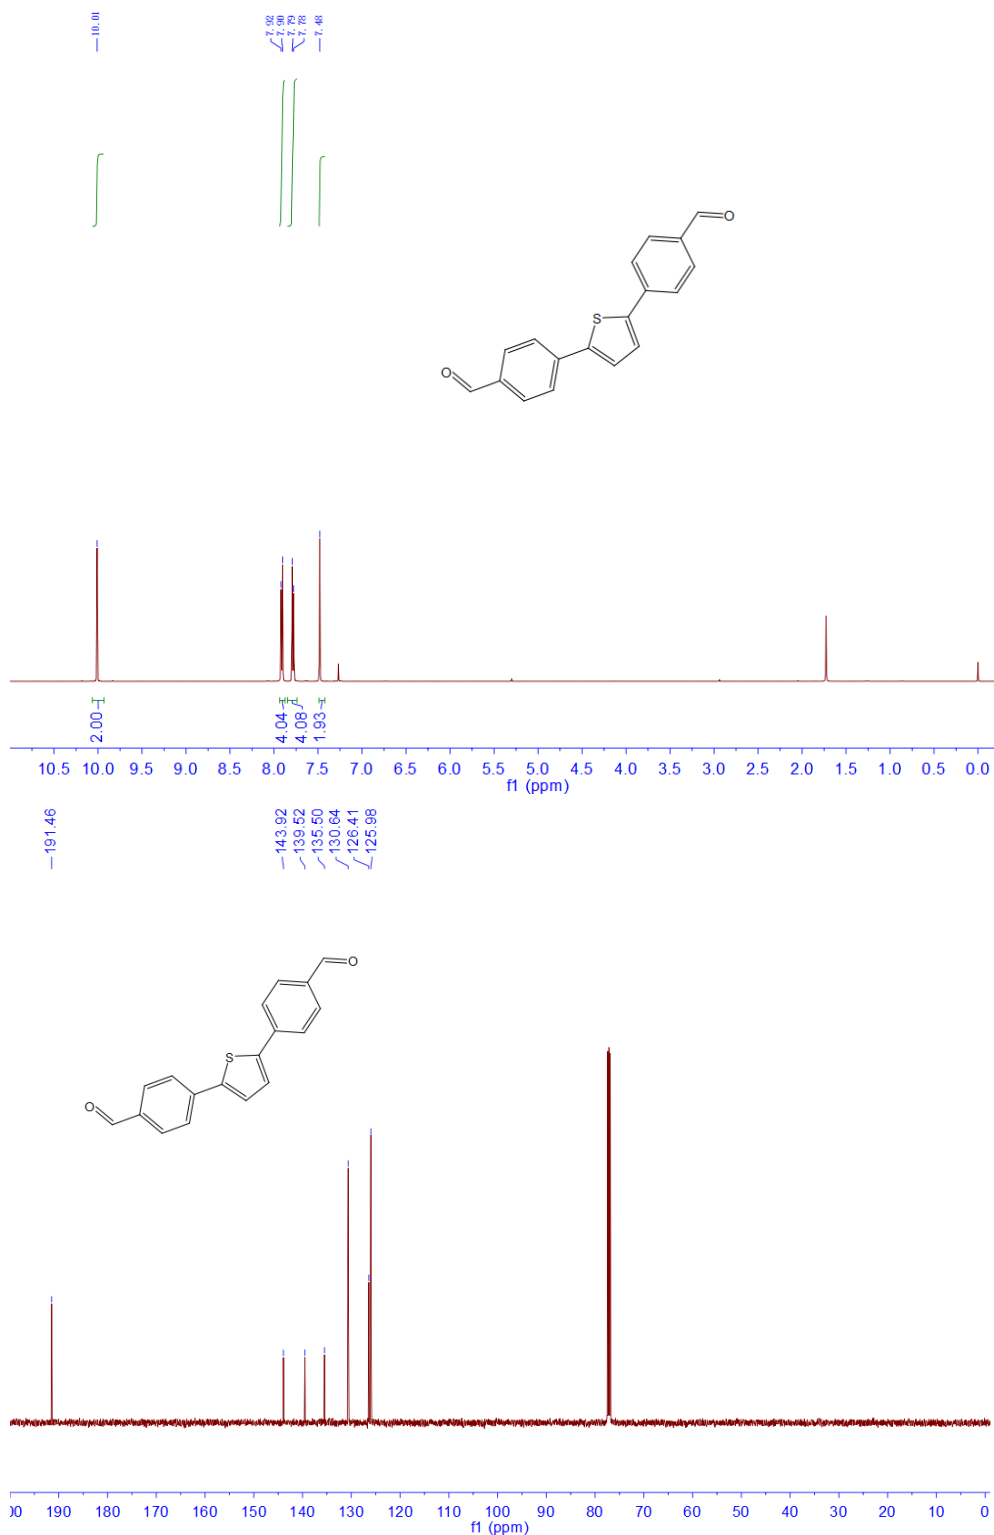

$^1\text{H}$  NMR ( $\text{CDCl}_3$ , 400 MHz):  $\delta$  10.0 (s, 2H), 7.92-7.90 (d,  $J = 8.0$  Hz,

4H), 7.79-7.78 (d,  $J = 8.0$  Hz, 4H), 7.48 (s, 2H) ppm.  $^{13}\text{C}$  NMR ( $\text{CDCl}_3$ , 100 MHz):  $\delta$  191.5, 143.9, 139.5, 135.5, 130.6, 126.4, 126.0 ppm.

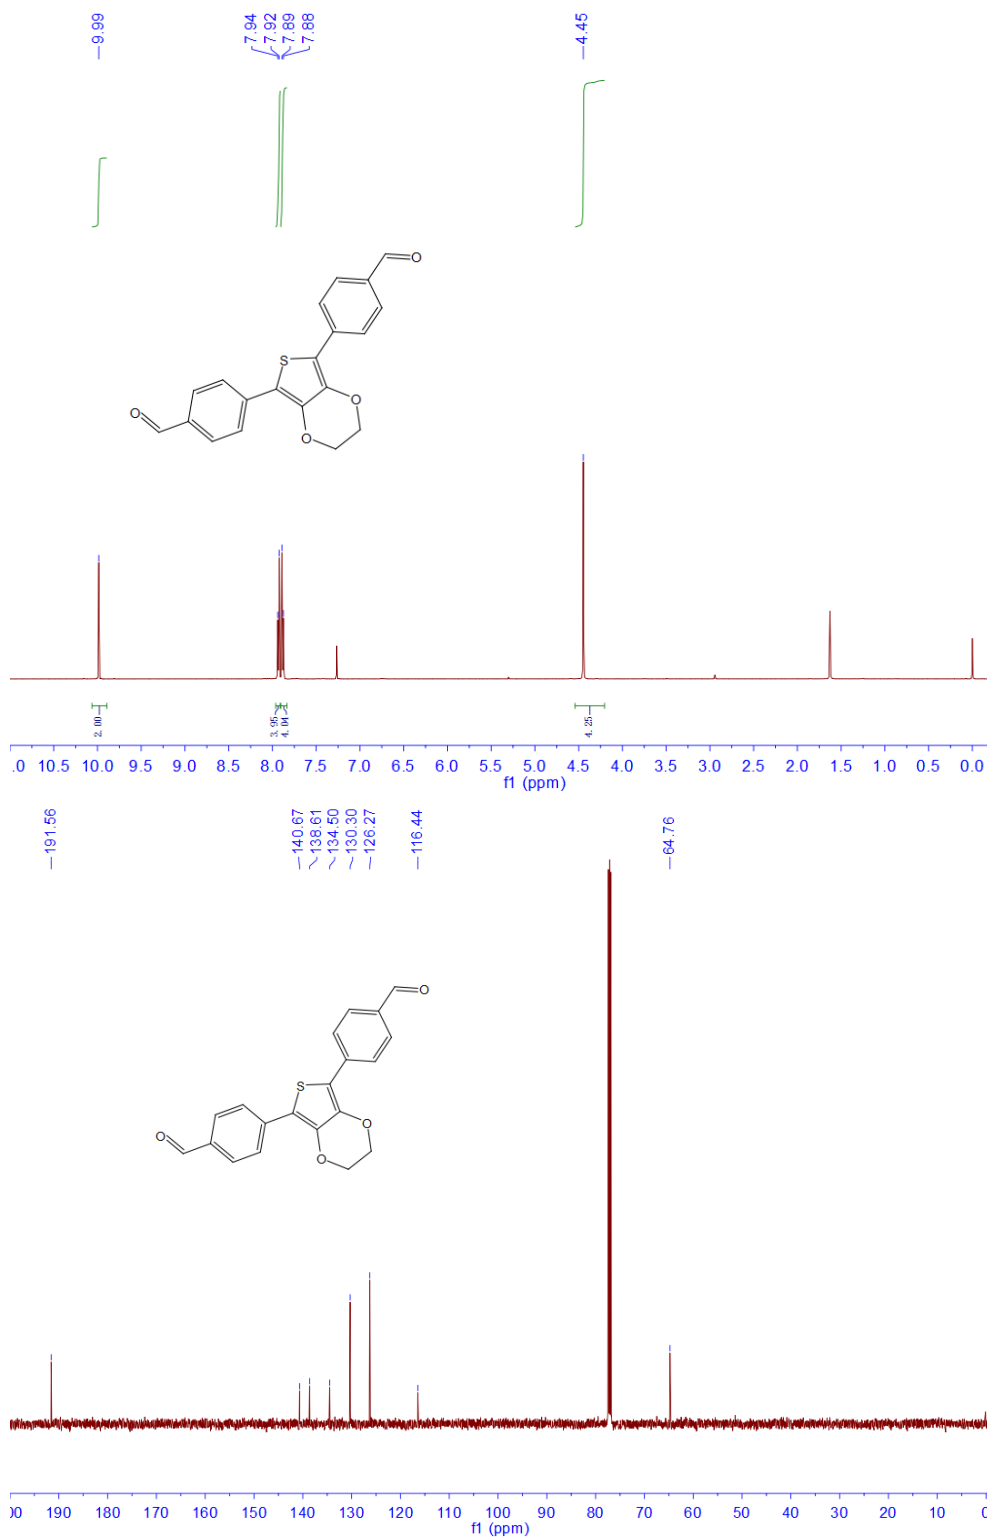

$^1\text{H}$  NMR ( $\text{CDCl}_3$ , 400 MHz):  $\delta$  9.99 (s, 2H), 7.94-7.92 (d,  $J = 8.0$  Hz,

4H), 7.89-7.88 (d,  $J = 4.0$  Hz, 4H), 4.45 (s, 4H) ppm.  $^{13}\text{C}$  NMR ( $\text{CDCl}_3$ , 100 MHz):  $\delta$  191.6, 140.7, 138.6, 134.5, 130.3, 126.3, 116.4, 64.8 ppm.
